# Supplementary material for: Chan–Lam N-arylation and C–H amination with heteroaromatic ring-NH: an approach to access extended-fused imidazo[1,2-a]-pyridines/pyrazines
Source: Royal Society of Chemistry journal article supplement (doi:10.1039/c9nj04966e), 2019-11-29

Electronic Supplementary Material (ESI) for New Journal of Chemistry

Manuscript ID NJ-LET-10-2019-004966

**Chan-Lam *N*-arylation and C–H amination with heteroaromatic ring-NH: An approach to access extended-fused imidazo[1,2-*a*]-pyridines/pyrazines**

Sankar Kumar Guchhait\* and Meenu Saini

**Table of Contents**

**I. General information**

**II. Spectral data of synthesized compounds**

**III. Spectral data of intermediates and side product and intermediates**

**IV. <sup>1</sup>H NMR and <sup>13</sup>C NMR Spectra**

## I. General information

All reactants and reagents were obtained from the commercial source and used without further purification. The  $^1\text{H}$  NMR (400 MHz) and  $^{13}\text{C}$  NMR (100 MHz) spectra were recorded on a Bruker Avance DPX 400 spectrometer in  $\text{CDCl}_3/\text{DMSO}-d_6$  using TMS as an internal standard.  $J$  values are given in Hz. The IR spectra were recorded on a Nicolet FT-IR Impact 410 instrument. HRMS (ESI) were recorded with Bruker-Maxis mass spectrometers. The reactions were monitored by TLC (Merck®, Silica gel 60 F254, 0.25 mm). The products were purified by column chromatography silica gel 100-200 (Merck, silica gel 100-200 mesh, neutral, spherical) or neutral alumina column chromatography. Evaporation of solvents was performed at reduced pressure, using a Büchi rotary evaporator.

### Representative experimental procedure for synthesis of 8-methylbenzo[4,5]imidazo[1,2-*a*]pyridine (**3a**, entry 1, Table 2):

A 25 mL dry two-necked round bottom flask equipped with a magnetic stirrer and guard tube containing calcium chloride was charged with 2-Aminopyridine (94mg, 1.0 mmol), *p*-Tolylboronic acid (270 mg, 2 mmols.), DIPEA (0.54 mL, 3mmols.) and  $\text{Cu}(\text{OAc})_2$  (181 mg, 1 mmol) in anhydrous DMSO solution (3 mL) with molecular sieves (200 mg). The mixture was heated at 120 °C for 24 h. An aqueous solution of ammonium hydroxide was added, and the mixture was extracted with ethyl acetate. The organic layer was washed with brine, and dried over anhydrous sodium sulfate. After removal of the solvent under reduced pressure, the residue was purified by column chromatography on silica gel using ethyl acetate/Hexane (30%) as eluting solvent. It afforded the product **3a** (154 mg, 85% yield).

Products (Table 2, Products **3b-3v**) were also prepared following this representative procedure

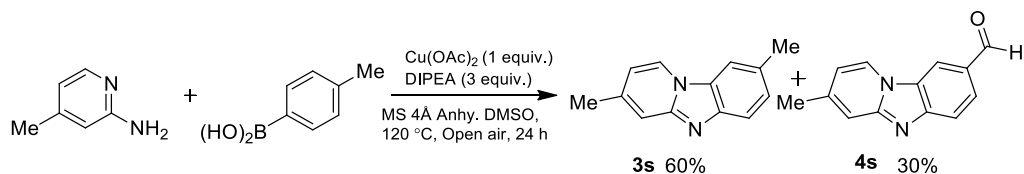

**Scheme S1:** Formation of unexpected product 8-methylbenzo[4,5]imidazo[1,2-*a*]pyridine-3-carbaldehyde(4s)

## II. Spectral data of synthesized compounds

### 8-Methylbenzo[4,5]imidazo[1,2-*a*]pyridine(3a):

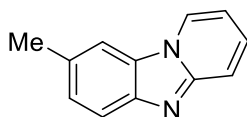

White solid; 154 mg, 85 %; m.p: 83-85 °C;  $^1\text{H NMR}$  (400 MHz,  $\text{CDCl}_3$ ):  $\delta$  8.37 (d,  $J = 6.8$  Hz, 1H), 7.83 (d,  $J = 8.3$  Hz, 1H), 7.67-7.65 (m, 2H), 7.39-7.35 (m, 2H), 6.80 (dd,  $J = 6.7, 6.4$  Hz, 1H), 2.59 (s, 3H) ppm;  $^{13}\text{C NMR}$  (100 MHz,  $\text{CDCl}_3$ ):  $\delta$  148.2, 142.5, 131.1, 128.7, 127.4, 125.0, 119.4, 117.9, 110.11, 110.10, 21.9 ppm; HRMS (ESI)  $m/z$ : calcd. for  $\text{C}_{12}\text{H}_{11}\text{N}_2$   $[\text{M}+\text{H}]^+$  183.0922, found: 183.0916.

### 8-Chlorobenzo[4,5]imidazo[1,2-*a*]pyridine (3b):

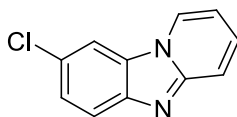

White solid; 132 mg, 70 %; m.p: 110-112 °C;  $^1\text{H NMR}$  (400 MHz,  $\text{CDCl}_3$ ):  $\delta$  8.40 (d,  $J = 6.8$  Hz, 1H), 7.92 (d,  $J = 1.7$  Hz, 1H), 7.87 (d,  $J = 8.7$  Hz, 1H), 7.71 (d,  $J = 9.2$  Hz, 1H), 7.52-7.44 (m, 2H), 6.90 (dd,  $J = 6.7, 6.7$  Hz, 1H) ppm;  $^{13}\text{C NMR}$  (100 MHz,  $\text{CDCl}_3$ ):  $\delta$  149.1, 142.9, 129.7, 129.0, 126.6, 126.4, 125.0, 120.8, 118.2, 110.8, 110.5 ppm; HRMS (ESI)  $m/z$ : calcd. for  $\text{C}_{11}\text{H}_8\text{ClN}_2$   $[\text{M}+\text{H}]^+$  203.0376, found: 203.0378.

**8-Bromobenzo[4,5]imidazo[1,2-a]pyridine (Product 3c):**

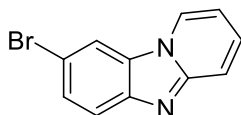

Pale Yellow solid; 166 mg, 68 %; m.p: 150-152 °C; <sup>1</sup>H NMR (400 MHz, CDCl<sub>3</sub>): δ 8.36 (d, *J* = 6.8 Hz, 1H), 8.04 (d, *J* = 1.7 Hz, 1H), 7.80 (d, *J* = 8.7 Hz, 1H), 7.69 (d, *J* = 9.2 Hz, 1H), 7.61 (dd, *J* = 8.7, 1.8 Hz, 1H), 7.45 (ddd, *J* = 6.6, 6.6, 1.2 Hz, 1H), 6.87 (ddd, *J* = 6.8, 6.8, 0.8 Hz, 1H) ppm; <sup>13</sup>C NMR (100 MHz, CDCl<sub>3</sub>): δ 148.9, 143.3, 129.8, 129.5, 129.0, 125.0, 121.2, 118.2, 113.7, 113.5, 110.8 ppm; HRMS (ESI) *m/z*: calcd. for C<sub>11</sub>H<sub>8</sub>Br<sup>79</sup>N<sub>2</sub> [M+H]<sup>+</sup> 246.9871, found: 246.9869.

**8-Iodobenzo[4,5]imidazo[1,2-a]pyridine(3d):**

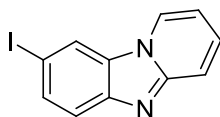

White solid; 154 mg, 78 %; m.p: 181-183 °C; <sup>1</sup>H NMR (400 MHz, CDCl<sub>3</sub>): δ 8.41 (d, *J* = 6.8 Hz, 1H), 8.27 (d, *J* = 1.3 Hz, 1H), 7.80 (dd, *J* = 8.6, 1.5 Hz, 1H), 7.72 (m, 2H), 7.48 (ddd, *J* = 8.0, 7.8, 1.1 Hz, 1H), 6.90 (dd, *J* = 6.8, 6.7 Hz, 1H) ppm; <sup>13</sup>C NMR (100 MHz, CDCl<sub>3</sub>): δ 148.6, 143.8, 134.5, 130.2, 129.9, 125.1, 121.6, 119.6, 118.1, 110.9, 83.3 ppm; MS (ESI) *m/z*: calcd. for C<sub>11</sub>H<sub>8</sub>I<sup>79</sup>N<sub>2</sub> [M+H]<sup>+</sup> 295.09, found: 295.16.

**8-Methoxybenzo[4,5]imidazo[1,2-a]pyridine (3e):**

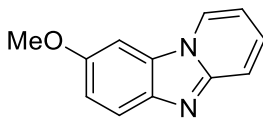

Dark brown solid; 130mg, 66 %; m.p: 155-156 °C; <sup>1</sup>H NMR (400 MHz, CDCl<sub>3</sub>): δ 8.34 (d, *J* = 6.8 Hz, 1H), 7.84 (d, *J* = 8.9 Hz, 1H), 7.66 (d, *J* = 9.2 Hz, 1H), 7.34 (dd, *J* = 7.7, 7.6 Hz, 1H), 7.29 (d, *J* = 2.2 Hz, 1H), 7.19 (dd, *J* = 8.8, 2.2 Hz, 1H), 6.81 (dd, *J* = 6.7, 6.6 Hz, 1H), 3.94 (s, 3H) ppm; <sup>13</sup>C NMR (100 MHz, CDCl<sub>3</sub>): δ 155.4, 148.0, 138.9, 128.7, 128.1, 124.7, 120.5, 118.1, 115.9, 110.1, 93.2, 58.0 ppm; HRMS (ESI) *m/z*: calcd. for C<sub>12</sub>H<sub>10</sub>N<sub>2</sub>O[M+H]<sup>+</sup> 199.0871, found: 199.0864.

**[1,3]Dioxolo[4'',5'':4',5']benzo[1',2':4,5]imidazo[1,2-*a*]pyridine(3f):**

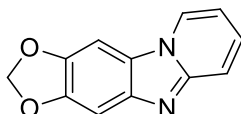

Off white solid; 161 mg, 76 %; m.p: >200 °C; <sup>1</sup>H NMR (400 MHz, CDCl<sub>3</sub>): δ 8.27 (d, *J* = 6.8 Hz, 1H), 7.63 (d, *J* = 9.2 Hz, 1H), 7.33-7.28 (m, 3H), 6.83 (dd, *J* = 6.7, 6.7 Hz, 1H), 6.08 (s, 2H) ppm; <sup>13</sup>C NMR (100 MHz, CDCl<sub>3</sub>): δ 147.9, 147.5, 144.2, 140.0, 127.0, 124.1, 122.7, 117.6, 110.4, 101.5, 98.8, 90.4 ppm. HRMS (ESI) *m/z*: calcd. for C<sub>12</sub>H<sub>8</sub>N<sub>2</sub>O<sub>2</sub>[M+H]<sup>+</sup> 213.0664, found: 213.0664.

**8-(Trifluoromethoxy)benzo[4,5]imidazo[1,2-*a*]pyridine (3g):**

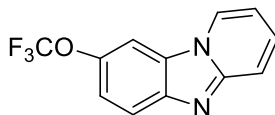

White solid; 163 mg, 65%; m.p: 110-112 °C; <sup>1</sup>H NMR (400 MHz, CDCl<sub>3</sub>): δ 8.43 (d, *J* = 7.0 Hz, 1H), 7.94 (d, *J* = 8.9 Hz, 1H), 7.80 (s, 1H), 7.73 (d, *J* = 9.2 Hz, 1H), 7.50-7.43 (m, 2H), 6.92 (dd, *J* = 6.7, 6.7 Hz, 1H) ppm; <sup>13</sup>C NMR (100 MHz, CDCl<sub>3</sub>): δ 149.9, 143.3, 142.9, 129.8,

128.2, 125.1, 120.71(q,  $J = 256$  Hz), 120.70, 119.9, 118.3, 110.8, 103.9 ppm; HRMS (ESI)  $m/z$ : calcd. for  $C_{12}H_8F_3N_2O$   $[M+H]^+$  253.0588, found: 253.0574.

**8-(Trifluoromethyl)benzo[4,5]imidazo[1,2-*a*]pyridine(3h):**

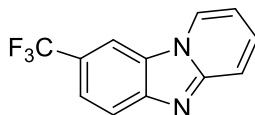

Pale Yellow solid; 169 mg, 72 %; m.p.: 90-91 °C;  $^1H$  NMR (400 MHz,  $CDCl_3$ ):  $\delta$  8.54 (d,  $J = 6.8$  Hz, 1H), 8.22 (s, 1H), 8.03 (d,  $J = 8.6$  Hz, 1H), 7.79 (dd,  $J = 9.0, 7.7$  Hz, 2H), 7.55 (ddd,  $J = 6.7, 6.6, 1.1$  Hz, 1H), 6.98 (dd,  $J = 6.8, 6.7$  Hz, 1H) ppm;  $^{13}C$  NMR (100 MHz,  $CDCl_3$ ): 150.3, 146.5, 130.7, 128.0, 125.3, 124.7(q,  $J = 270$  Hz) 123.1, 122.7, 122.4 (q,  $J = 3$  Hz), 120.3, 118.3, 111.2, 108.5(q,  $J = 5$  Hz); HRMS (ESI)  $m/z$ : calcd. for  $C_{11}H_7F_3N_2$   $[M+H]^+$  237.0639, found: 237.0641.

**Benzo[4,5]imidazo[1,2-*a*]pyridin-8-ylmethanol (3i):**

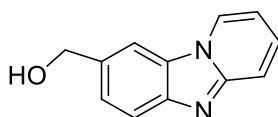

White solid; 114 mg, 58 %; m.p.: >200 °C;  $^1H$  NMR (400 MHz,  $CDCl_3$ ):  $\delta$  8.44 (d,  $J = 6.8$  Hz, 1H), 7.94 (s, 1H), 7.89 (d,  $J = 8.4$  Hz, 1H), 7.70 (d,  $J = 9.2$  Hz, 1H), 7.50 (dd,  $J = 8.4, 1.1$  Hz, 1H), 7.44 (ddd,  $J = 6.6, 6.6, 1.1$  Hz, 1H), 6.87 (dd,  $J = 6.7, 6.1$  Hz, 1H), 4.94 (s, 2H) ppm;  $^{13}C$  NMR (100 MHz,  $CDCl_3$ ):  $\delta$  148.8, 144.0, 138.4, 134.3, 129.4, 125.1, 119.8, 118.0, 110.4, 108.9, 65.5 ppm. HRMS (ESI)  $m/z$ : calcd. for  $C_{12}H_{10}N_2O$   $[M+H]^+$  199.0871, found: 199.0860.

**Benzo[4,5]imidazo[1,2-*a*]pyridine-8-carbaldehyde (3j):**

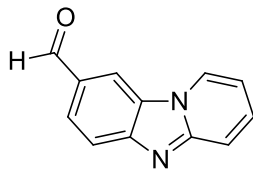

White solid; 82 mg, 42 %; m.p: >200 °C; <sup>1</sup>H NMR (400 MHz, CDCl<sub>3</sub>): δ 10.13 (s, 1H), 8.58 (d, *J* = 6.7 Hz, 1H), 8.47 (s, 1H), 8.04 ((dd, *J* = 8.4, 1.0 Hz, 1H), 7.99 (d, *J* = 8.5 Hz, 1H), 7.75 (d, *J* = 9.2 Hz, 1H), 7.58 (dd, *J* = 8.6, 7.2 Hz, 1H), 7.00 (dd, *J* = 6.7, 6.6 Hz, 1H) ppm; <sup>13</sup>C NMR (100 MHz, CDCl<sub>3</sub>): δ 191.2, 151.2, 149.0, 131.6, 129.6, 129.0, 127.5, 125.8, 120.0, 118.3, 112.7, 111.7 ppm; HRMS (ESI) *m/z*: calcd. for C<sub>12</sub>H<sub>8</sub>N<sub>2</sub>O[M+H]<sup>+</sup> 197.0715, found: 197.0707.

**1-(Benzo[4,5]imidazo[1,2-*a*]pyridin-8-yl)ethanone(3k):**

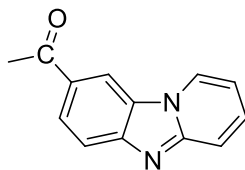

White solid; 105 mg, 50 %; m.p: >200 °C; <sup>1</sup>H NMR (400 MHz, CDCl<sub>3</sub>): δ 8.57 (s, 1H), 8.54 (d, *J* = 6.7 Hz, 1H), 8.11 (dd, *J* = 8.5, 1.2 Hz, 1H), 7.89 (d, *J* = 8.6, 1H), 7.71 (d, *J* = 9.2 Hz, 1H), 7.52 (dd, *J* = 8.2, 7.5 Hz, 1H), 6.94 (dd, *J* = 6.7, 6.7 Hz, 1H), 2.72 (s, 3H) ppm; <sup>13</sup>C NMR (100 MHz, CDCl<sub>3</sub>): δ 197.2, 150.8, 147.8, 131.2, 130.0, 128.7, 126.3, 125.7, 119.2, 118.1, 111.4, 111.3, 26.8 ppm; HRMS (ESI) *m/z*: calcd. for C<sub>13</sub>H<sub>10</sub>N<sub>2</sub>O[M+H]<sup>+</sup> 211.0871, found: 211.0871.

**Methyl benzo[4,5]imidazo[1,2-*a*]pyridine-7-carboxylate (3l):**

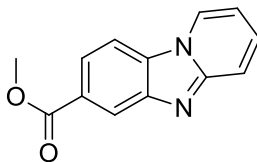

White solid; 124 mg, 55 %; m.p: >200 °C; <sup>1</sup>H NMR (400 MHz, CDCl<sub>3</sub>): δ 8.67 (s, 1H), 8.48 (d, *J* = 6.7 Hz, 1H), 8.10 (d, *J* = 8.5 Hz, 1H), 7.94 (d, *J* = 8.5, 1H), 7.75 (d, *J* = 9.2, 1H), 7.49 (dd, *J* = 8.4, 6.8 Hz 1H), 6.92 (dd, *J* = 6.7, 6.7, 1H), 4.01 (s, 3H) ppm; <sup>13</sup>C NMR (100 MHz, CDCl<sub>3</sub>): δ 167.3, 149.8, 144.0, 131.6, 130.1, 127.6, 125.3, 122.3, 122.1, 118.4, 111.0, 110.3, 52.3 ppm; HRMS (ESI) *m/z*: calcd. for C<sub>13</sub>H<sub>10</sub>N<sub>2</sub>O<sub>2</sub>[M+H]<sup>+</sup> C 227.0820, found: 227.0814.

**Methyl benzo[4,5]imidazo[1,2-*a*]pyridine-8-carboxylate (3m):**

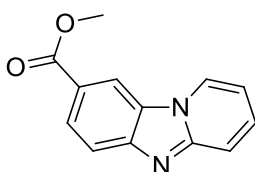

White solid; 135 mg, 60 %; m.p: 179-181 °C; <sup>1</sup>H NMR (400 MHz, CDCl<sub>3</sub>): δ 8.71 (s, 1H), 8.59 (d, *J* = 6.7 Hz, 1H), 8.25 (d, *J* = 8.6 Hz, 1H), 7.95 (d, *J* = 8.6, 1H), 7.77 (d, *J* = 9.1, 1H), 7.56 (dd, *J* = 8.8, 7.0 Hz, 1H), 6.98 (dd, *J* = 6.7, 6.7, 1H), 4.01 (s, 3H) ppm; <sup>13</sup>C NMR (100 MHz, CDCl<sub>3</sub>): δ 167.2, 150.5, 147.8, 130.9, 128.4, 126.8, 125.6, 122.5, 119.3, 118.2, 113.1, 111.2, 52.2 ppm; HRMS (ESI) *m/z*: calcd. for C<sub>13</sub>H<sub>10</sub>N<sub>2</sub>O<sub>2</sub>[M+H]<sup>+</sup> 227.0820, found: 227.0817.

**Benzo[4,5]imidazo[1,2-*a*]pyridine(3n):**

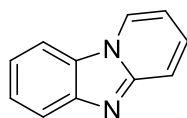

White solid; 134 mg, 80 %; m.p: 181-182 °C; <sup>1</sup>H NMR (400 MHz, CDCl<sub>3</sub>): δ 8.44 (d, *J* = 6.8 Hz, 1H), 7.96 (d, *J* = 8.2 Hz, 1H), 7.89 (d, *J* = 7.9 Hz, 1H), 7.70 (d, *J* = 9.1, 1H), 7.54 (dd, *J* = 7.7, 7.6, 1H), 7.44-7.36 (m, 2H), 6.84 (dd, *J* = 6.7, 6.6, 1H) ppm; <sup>13</sup>C NMR (100 MHz, CDCl<sub>3</sub>): δ 148.5, 144.5, 129.3, 128.6, 125.6, 125.2, 121.0, 119.9, 118.0, 110.4, 110.3 ppm; HRMS (ESI) *m/z*: calcd. for C<sub>11</sub>H<sub>8</sub>N<sub>2</sub>[M+H]<sup>+</sup> 169.0765, found: 169.0761.



**Naphtho[2',3':4,5]imidazo[1,2-*a*]pyridine(3o):**

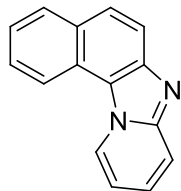

White solid; 122 mg, 56 %; m.p: 160-162 °C; <sup>1</sup>H NMR (400 MHz, CDCl<sub>3</sub>): δ 9.15 (d, *J* = 6.9 Hz, 1H), 8.51 (d, *J* = 8.3 Hz, 1H), 8.10 (d, *J* = 8.0 Hz 1H), 8.03 (d, *J* = 8.8 Hz, 1H), 7.94-7.89 (m, 2H), 7.75 (dd, *J* = 7.6, 7.4 Hz, 1H), 7.57 (dd, *J* = 7.5, 7.4, 1H), 7.48 (dd, *J*= 8.4, 7.2, 1H) 7.07 (dd, *J*= 6.7, 6.7, 1H) ppm; <sup>13</sup>C NMR (100 MHz, CDCl<sub>3</sub>): δ 147.7, 143.1, 130.3, 130.0, 127.7, 127.0, 126.94, 126.91, 124.0, 122.9, 121.5, 120.1, 119.1, 118.3, 111.9 ppm; HRMS (ESI) *m/z*: calcd. for C<sub>15</sub>H<sub>10</sub>N<sub>2</sub> [M+H]<sup>+</sup> 219.0922, found: 219.0911.

**Imidazo[1,2-*a*:5,4-*c'*]dipyridine (3p):**

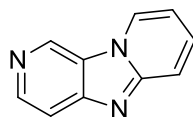

White solid; 98 mg, 58 %; m.p: 135-137 °C; <sup>1</sup>H NMR (400 MHz, *d*<sub>6</sub>-DMSO): δ 9.63 (s, 1H), 9.28 (d, *J* = 6.7 Hz, 1H), 8.53 (d, *J* = 4.1 Hz, 1H), 7.79-7.72 (m, 3H), 7.16 (dd, *J* = 5.8, 6.0 Hz, 1H) ppm; <sup>13</sup>C NMR (100 MHz, *d*<sub>6</sub>-DMSO): δ 150.1, 148.7, 144.4, 136.2, 133.3, 128.6, 127.5, 117.4, 113.8, 112.2 ppm; HRMS (ESI) *m/z*: calcd. for C<sub>10</sub>H<sub>7</sub>N<sub>3</sub> [M+H]<sup>+</sup> 170.0718, found: 170.0719.

**8-Chloro-4-methylbenzo[4,5]imidazo[1,2-*a*]pyridine(3q):**

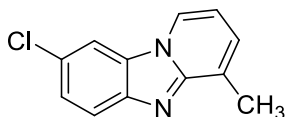

White solid; 118 mg, 55 %; m.p: 131-132 °C; <sup>1</sup>H NMR (400 MHz, CDCl<sub>3</sub>): δ 8.26 (d, *J* = 6.8 Hz, 1H), 7.90 (d, *J* = 8.7 Hz, 1H), 7.87 (d, *J* = 1.5 Hz, 1H), 7.49 (dd, *J* = 8.7, 1.8 Hz, 1H), 7.25 (d, *J* = 6.7 Hz, 1H), 6.81 (dd, *J* = 6.8, 6.8 Hz, 1H), 2.70 (s, 3H) ppm; <sup>13</sup>C NMR (100 MHz, CDCl<sub>3</sub>): δ 149.7, 142.6, 129.5, 128.09, 128.02, 126.5, 126.2, 122.7, 120.8, 110.9, 110.7, 17.5 ppm; HRMS (ESI) *m/z*: calcd. for C<sub>12</sub>H<sub>9</sub>CIN<sub>2</sub> [M+H]<sup>+</sup> 217.0532, found: 217.0524.

**8-Bromo-4-methylbenzo[4,5]imidazo[1,2-*a*]pyridine(3r):**

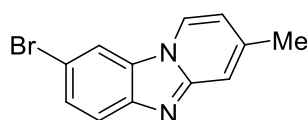

White solid; 135 mg, 52 %; m.p: >200 °C; <sup>1</sup>H NMR (400 MHz, CDCl<sub>3</sub>): δ 8.23 (d, *J* = 7.0 Hz, 1H), 7.98 (d, *J* = 1.6 Hz, 1H), 7.75 (d, *J* = 8.7 Hz, 1H), 7.58 (dd, *J* = 8.6, 1.7 Hz, 1H), 7.42 (s, 1H), 6.70 (d, *J* = 6.9 Hz, 1H), 2.47 (s, 3H) ppm; <sup>13</sup>C NMR (100 MHz, CDCl<sub>3</sub>): δ 149.5, 143.3, 141.4, 129.5, 128.6, 124.1, 120.8, 116.1, 113.7, 113.3, 113.2, 21.9 ppm; HRMS (ESI) *m/z*: calcd. for C<sub>12</sub>H<sub>10</sub>Br<sup>79</sup>N<sub>2</sub> [M+H]<sup>+</sup> 261.0027, found: 261.0020.

**3,8-Dimethylbenzo[4,5]imidazo[1,2-*a*]pyridine(3s):**

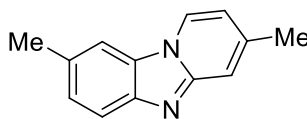

White solid; 177 mg, 60 %; m.p: 134-135 °C; <sup>1</sup>H NMR (400 MHz, CDCl<sub>3</sub>): δ 8.28 (d, *J* = 7.0 Hz, 1H), 7.89 (d, *J* = 8.3 Hz, 1H), 7.65 (s, 1H), 7.42 (s, 1H), 7.34 (dd, *J* = 8.2, 1.0 Hz, 1H), 6.66 (dd, *J* = 7.0, 1.2 Hz, 1H), 2.59 (s, 3H), 2.47 (s, 3H) ppm; <sup>13</sup>C NMR (100 MHz, CDCl<sub>3</sub>): δ 148.3, 142.7, 140.2, 130.6, 128.7, 127.1, 124.0, 119.1, 115.9, 112.9, 109.9, 21.87, 21.82 ppm; HRMS (ESI) *m/z*: calcd. for C<sub>13</sub>H<sub>12</sub>N<sub>2</sub> [M+H]<sup>+</sup> 197.1078, found: 197.1069.

**2-(Benzyloxy)benzo[4,5]imidazo[1,2-*a*]pyridine (3t):**

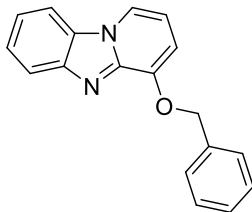

Black solid; 137 mg, 50 %; m.p: 97-99 °C; <sup>1</sup>H NMR (400 MHz, CDCl<sub>3</sub>): δ 8.09-8.07 (m, 1H), 8.03 (d, *J* = 8.2 Hz, 1H), 7.85 (d, *J* = 8.1 Hz, 1H), 7.55-7.51 (m, 3H), 7.41-7.34 (m, 4H), 6.72-6.69 (m, 2H), 5.41 (s, 2H) ppm; <sup>13</sup>C NMR (100 MHz, CDCl<sub>3</sub>): δ 148.0, 144.0, 143.6, 135.9, 129.3, 128.6, 128.1, 127.5, 125.4, 121.3, 120.5, 117.8, 110.5, 110.0, 106.2, 70.9 ppm; HRMS (ESI) *m/z*: calcd. for C<sub>18</sub>H<sub>14</sub>N<sub>2</sub>O[M+H]<sup>+</sup> 275.1184, found: 275.1186.

**7-Chlorobenzo[4,5]imidazo[1,2-*a*]pyrazine (3u):**

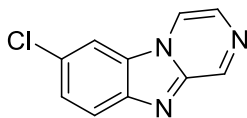

White solid; 107 mg, 53 %; m.p: 142-143 °C; <sup>1</sup>H NMR (400 MHz, CDCl<sub>3</sub>): δ 9.30 (s, 1H), 8.28 (dd, *J* = 4.6, 1.4 Hz, 1H), 8.01-7.98 (m, 3H), 7.60 (dd, *J* = 9.0, 1.7 Hz, 1H) ppm; <sup>13</sup>C NMR (100 MHz, CDCl<sub>3</sub>): δ 146.0, 142.77, 142.70, 129.1, 128.19, 128.11, 127.6, 122.5, 117.6, 111.2 ppm; HRMS (ESI) *m/z*: calcd. for C<sub>10</sub>H<sub>6</sub>ClN<sub>3</sub> [M+H]<sup>+</sup> 204.0328, found: 204.0328.

**7-Methylbenzo[4,5]imidazo[1,2-*a*]pyrazine (3v):**

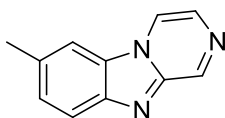

White solid; 78 mg, 43 %; m.p: 163-164 °C; <sup>1</sup>H NMR (400 MHz, *d*<sub>6</sub>-DMSO): δ 9.25 (s, 1H), 9.05 (dd, *J* = 4.6, 1.5 Hz, 1H), 8.22 (s, 1H), 8.00 (d, *J* = 4.6 Hz, 1H), 7.87 (d, *J* = 8.5 Hz, 1H), 7.48 (dd, *J* = 8.5, 1.2 Hz, 1H), 2.57 (s, 3H) ppm; <sup>13</sup>C NMR (100 MHz, CDCl<sub>3</sub>): δ 145.6, 142.7, 141.9, 133.7, 129.2, 127.8, 126.9, 120.8, 117.7, 110.6, 21.9 ppm; HRMS (ESI) *m/z*: calcd. for C<sub>11</sub>H<sub>9</sub>N<sub>3</sub> [M+H]<sup>+</sup> 184.0875, found: 184.0877.

### III. Spectral data of intermediates and side product and intermediates

#### 8-Methylbenzo[4,5]imidazo[1,2-*a*]pyridine-3-carbaldehyde(4s):

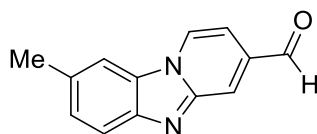

Yellow solid; 63 mg, 30 %; m.p: 114-115 °C; <sup>1</sup>H NMR (400 MHz, *d*<sub>6</sub>-DMSO): δ 10.09 (s, 1H), 9.12-9.09 (m, 1H), 8.40(s, 1H), 8.18 (s, 1H), 7.82 (d, *J* = 8.3 Hz, 1H), 7.42 (d, *J* = 8.4 Hz, 1H), 7.25 (d, *J* = 6.8 Hz, 1H), 2.56 (s, 3H) ppm; <sup>13</sup>C NMR (100 MHz, *d*<sub>6</sub>-DMSO): 191.9, 146.3, 143.3, 135.7, 132.3, 128.9, 128.0, 127.6, 124.5, 119.4, 111.8, 104.9, 21.5 ppm; HRMS (ESI) *m/z*: calcd. for C<sub>13</sub>H<sub>10</sub>N<sub>2</sub>O [M+H]<sup>+</sup> 211.0871, found: 211.0860.

#### *N*-(*p*-Tolyl)pyridin-2-amine (3ai):

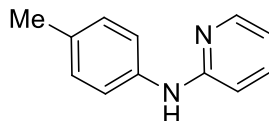

White solid; 165 mg, 90 %; m.p: 103-104 °C; <sup>1</sup>H NMR (400 MHz, CDCl<sub>3</sub>): δ 8.20 (dd, *J* = 4.8, 0.9 Hz, 1H), 7.47 (ddd, *J* = 7.2, 7.2, 1.8 Hz, 1H), 7.23 (d, *J* = 8.2 Hz, 2H), 7.16 (d, *J* = 8.2 Hz, 2H), 6.85 (d, *J* = 8.7 Hz, 1H), 6.71 (dd, *J* = 6.3, 5.7 Hz, 1H), 2.35 (s, 3H) ppm; <sup>13</sup>C NMR (100

MHz, CDCl<sub>3</sub>):  $\delta$  156.4, 148.4, 137.8, 137.6, 132.7, 129.8, 121.2, 114.5, 107.6, 20.8 ppm;

HRMS (ESI)  $m/z$ : calcd. for C<sub>12</sub>H<sub>12</sub>N<sub>2</sub> [M+H]<sup>+</sup> 185.1078, found: 185.1071.

***N*-(4-Bromophenyl)pyridin-2-amine (3ci):**

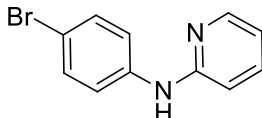

White solid; 204 mg, 82 %; m.p: 130-131 °C; <sup>1</sup>H NMR (400 MHz, CDCl<sub>3</sub>):  $\delta$  8.24 (br s, 1H), 7.53 (ddd,  $J$  = 7.9, 7.7, 1.4 Hz, 1H), 7.44 (d,  $J$  = 8.7, 2H), 7.28 (d,  $J$  = 8.7, 2H), 6.84-6.77 (m, 2H), 6.69 (s, 1H) ppm; <sup>13</sup>C NMR (100 MHz, CDCl<sub>3</sub>):  $\delta$  155.4, 148.3, 139.6, 137.9, 132.1, 121.4, 115.5, 114.7, 108.8 ppm; HRMS (ESI)  $m/z$ : calcd. for C<sub>11</sub>H<sub>9</sub>Br<sup>79</sup>N<sub>2</sub> [M+H]<sup>+</sup> 249.0027, found: 249.0014.

## IV. $^1\text{H}$ NMR and $^{13}\text{C}$ NMR Spectra

### $^1\text{H}$ NMR spectra of compound 3a

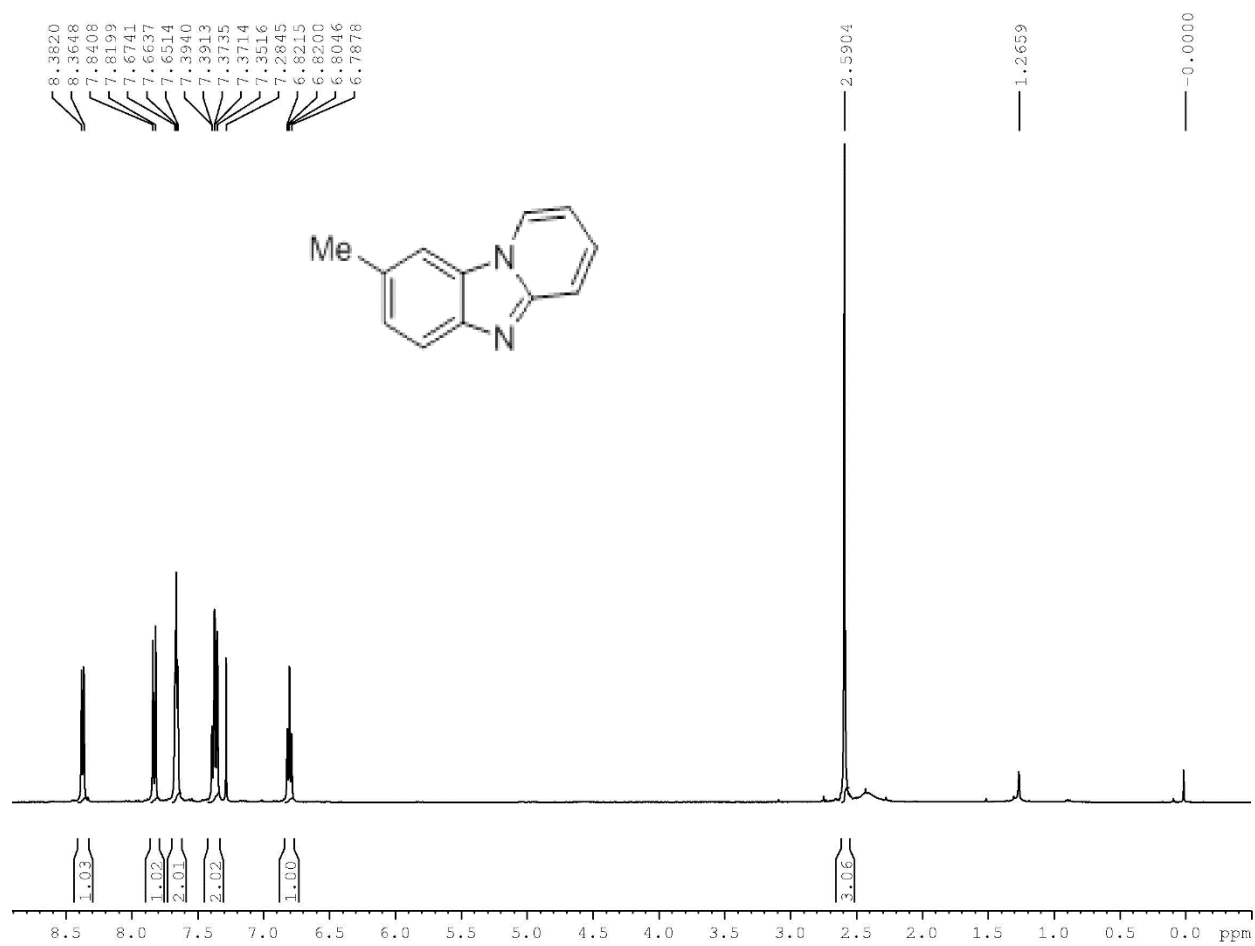

### <sup>13</sup>C NMR spectra of compound 3a

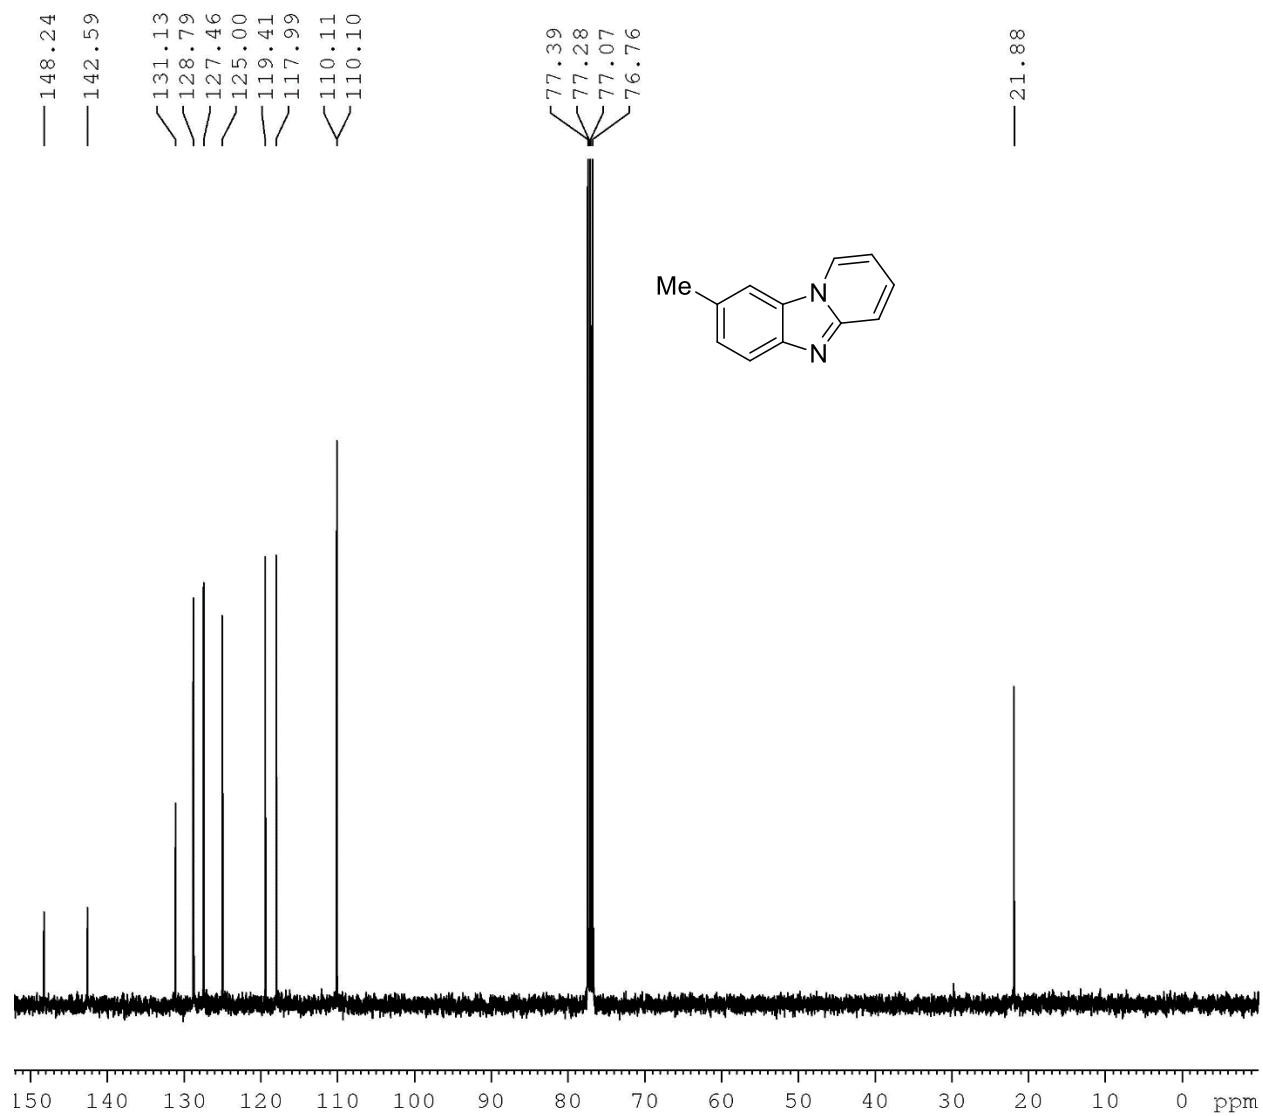

# <sup>1</sup>H NMR spectra of compound 3b

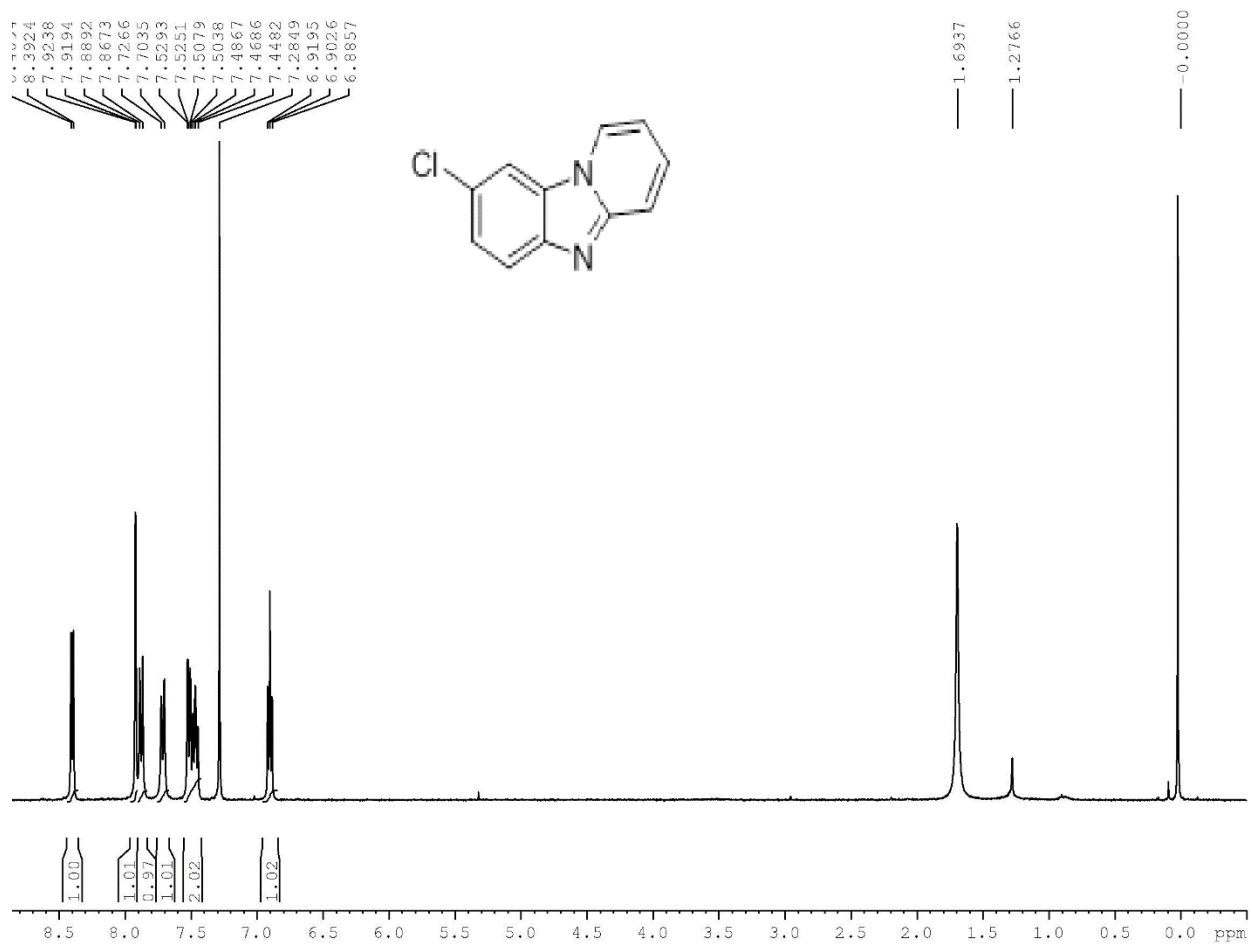



# <sup>13</sup>C NMR spectra of compound 3b

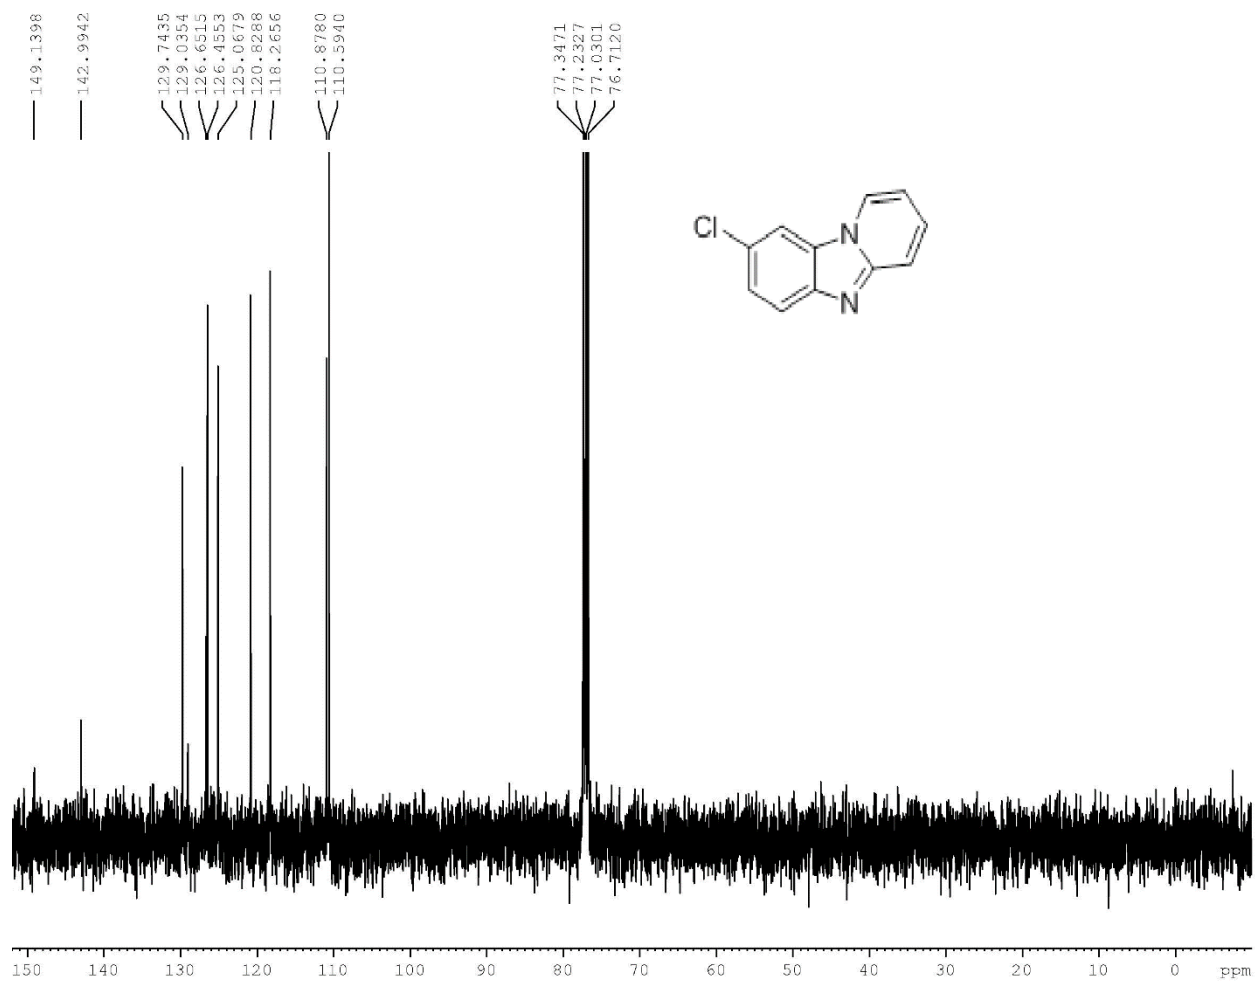

# <sup>1</sup>H NMR spectra of compound 3c

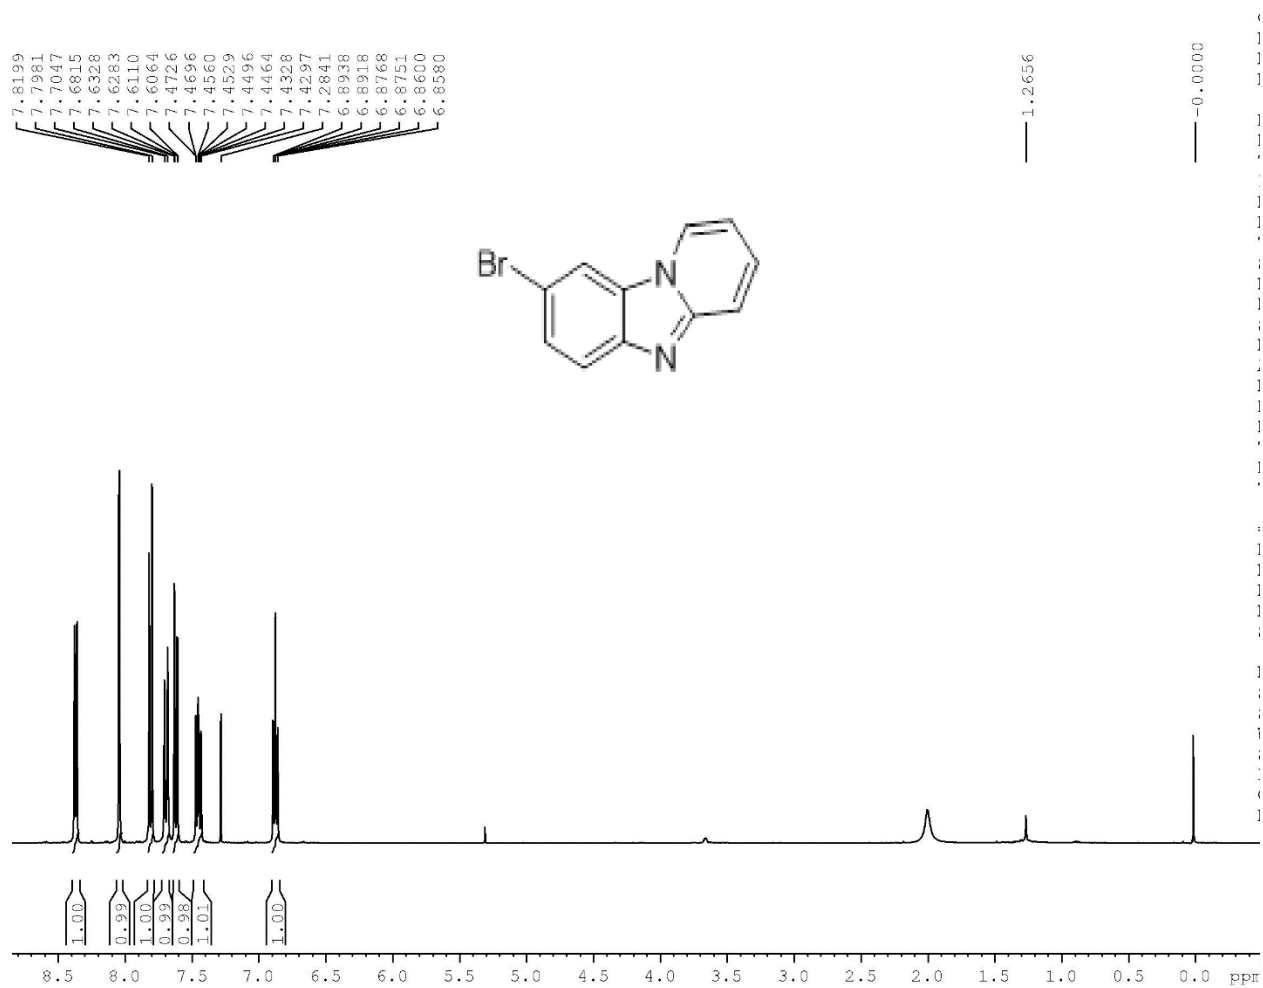

# <sup>13</sup>C NMR spectra of compound 3c

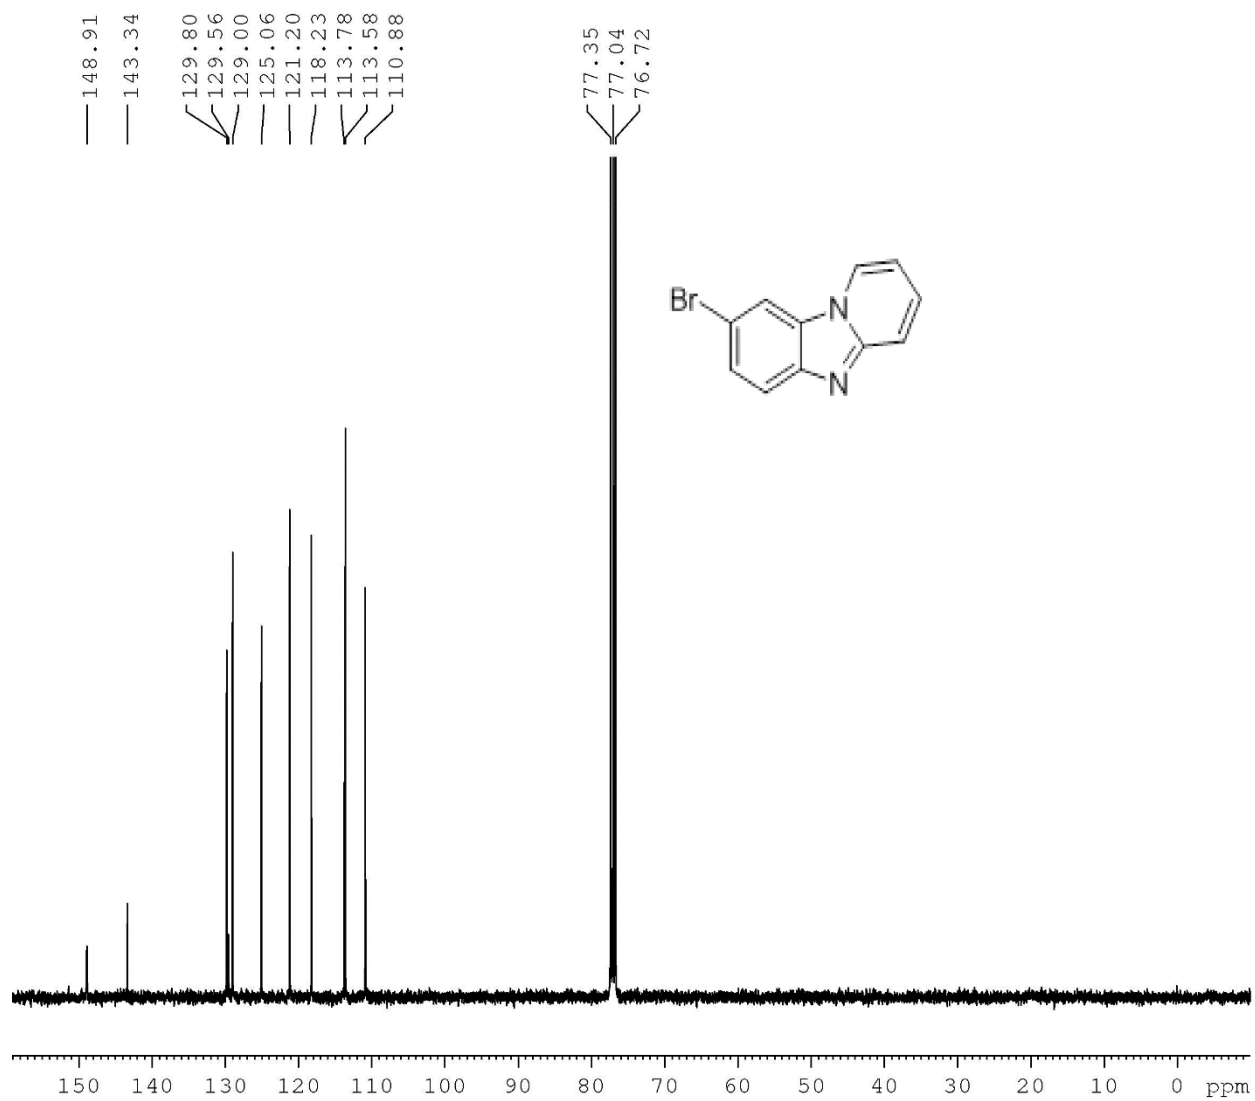

# <sup>1</sup>H NMR spectra of compound 3d

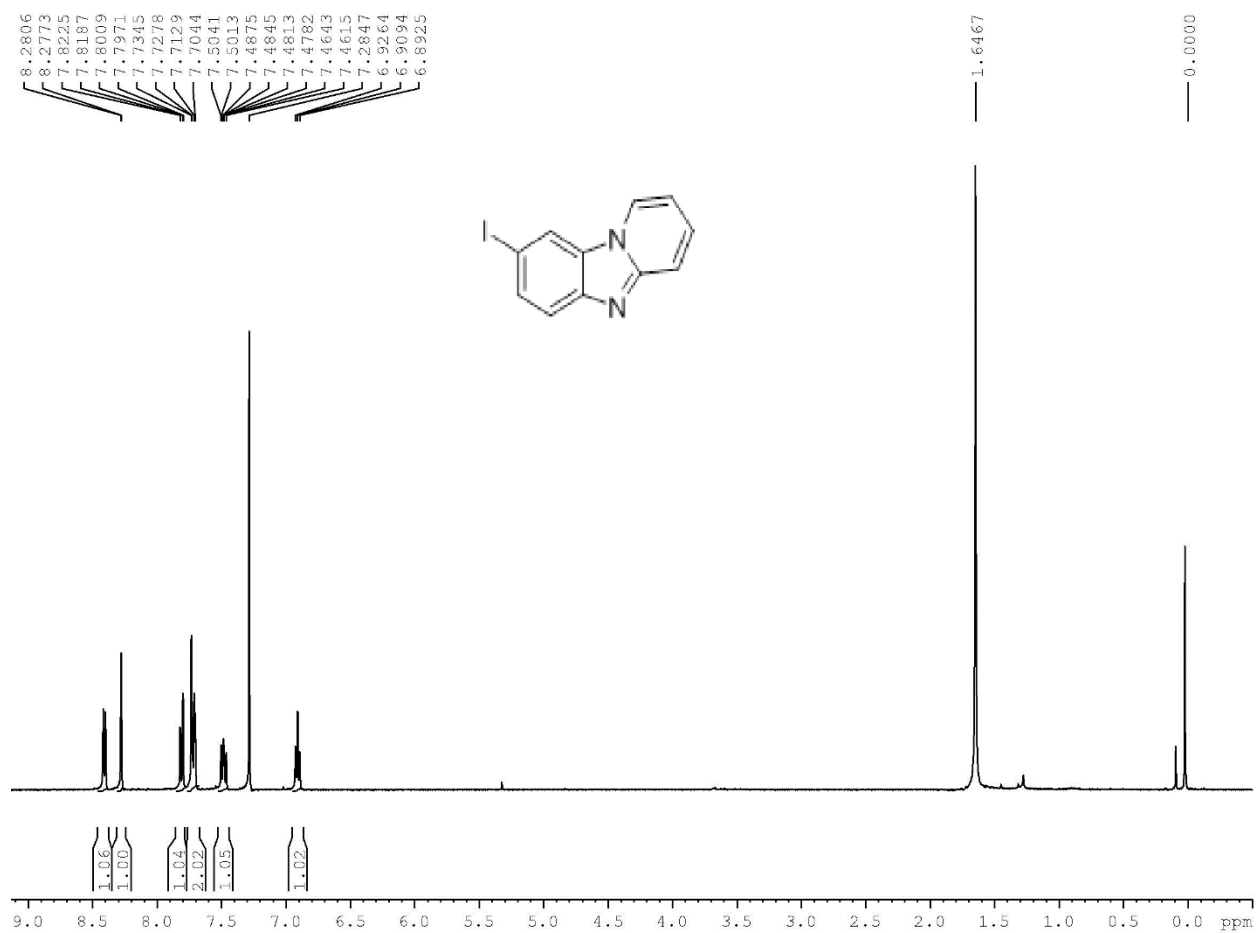

# <sup>13</sup>C NMR spectra of compound 3d

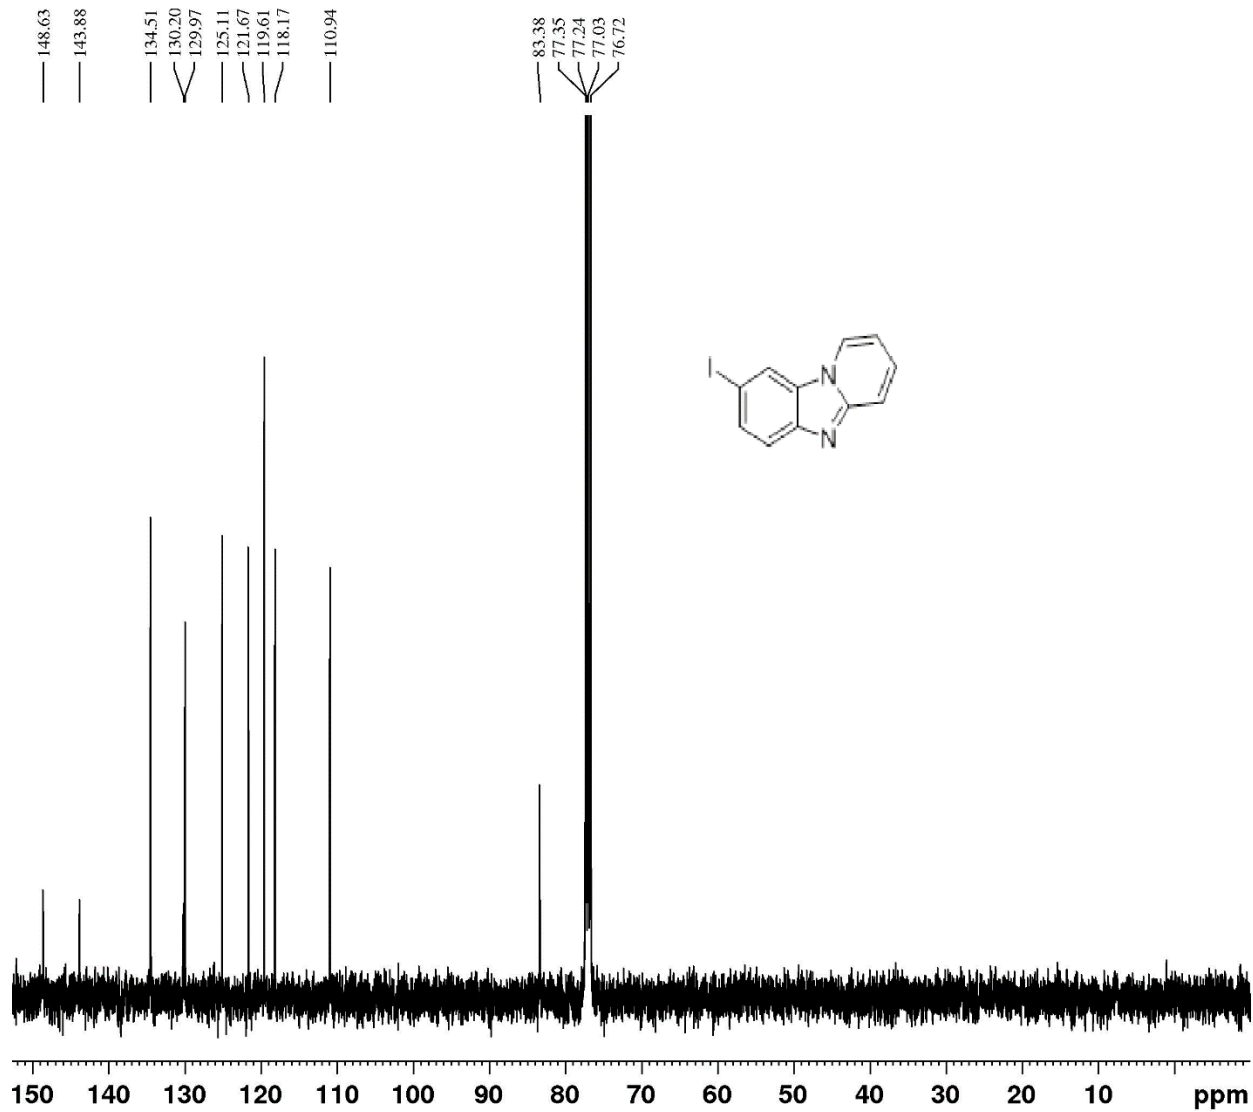

# <sup>1</sup>H NMR spectra of compound 3e

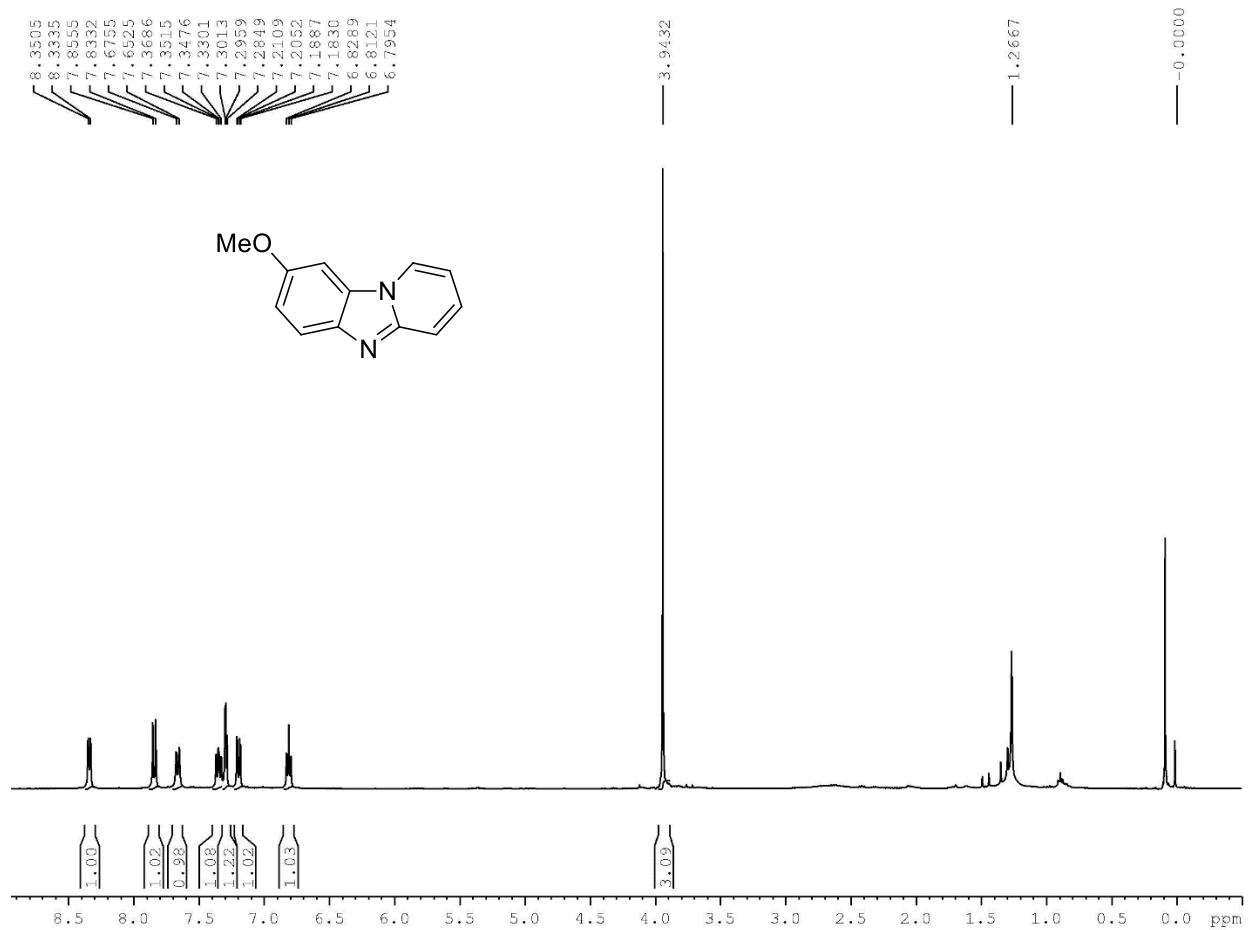

### <sup>13</sup>C NMR spectra of compound 3e

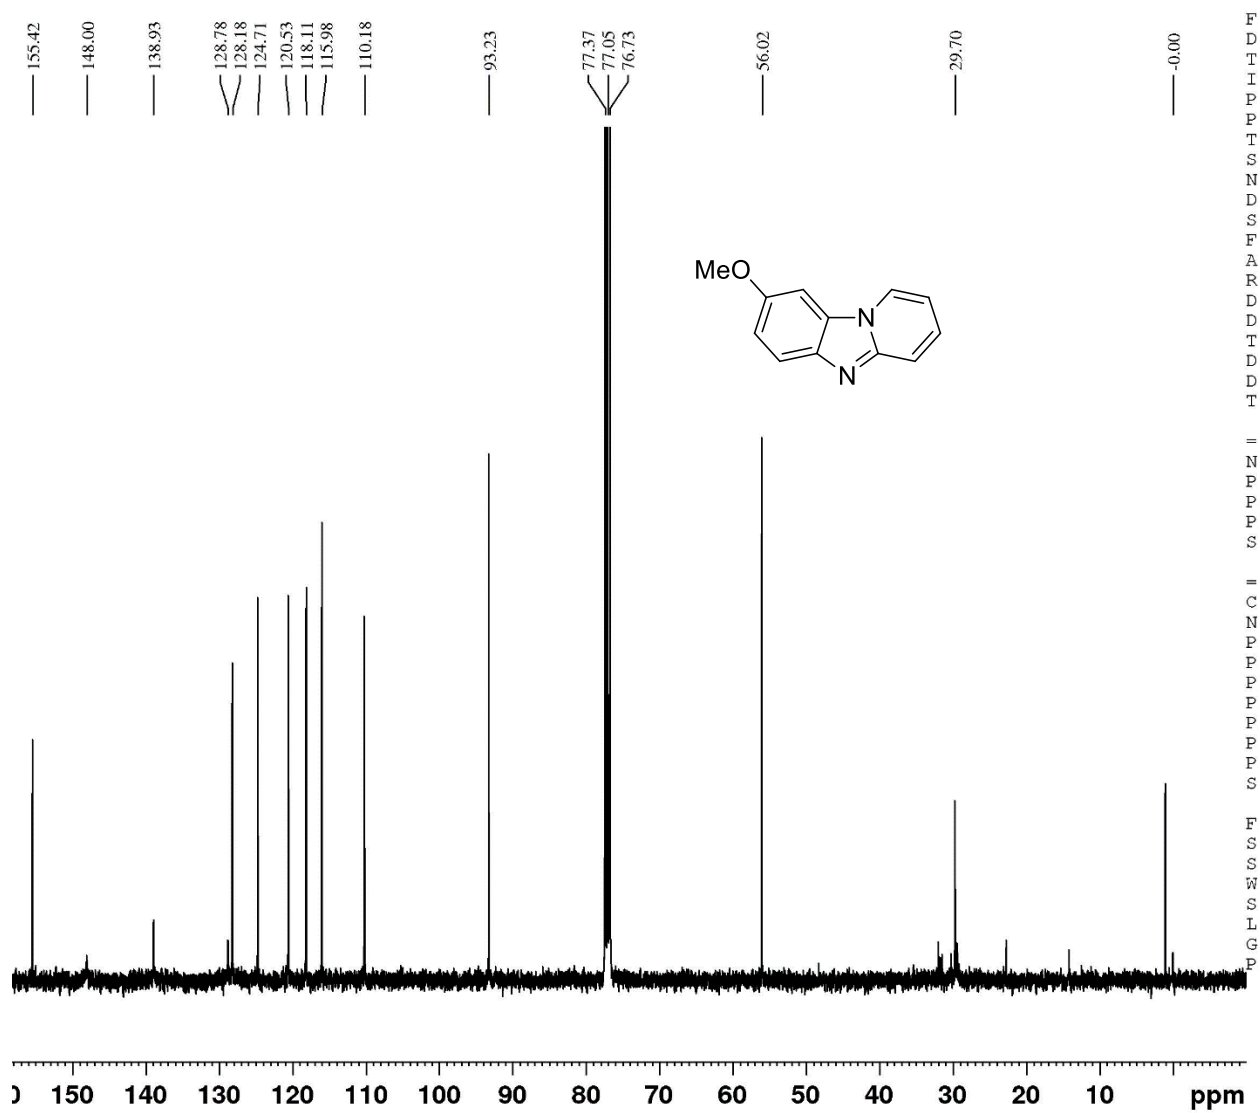

# <sup>1</sup>H NMR spectra of compound 3f

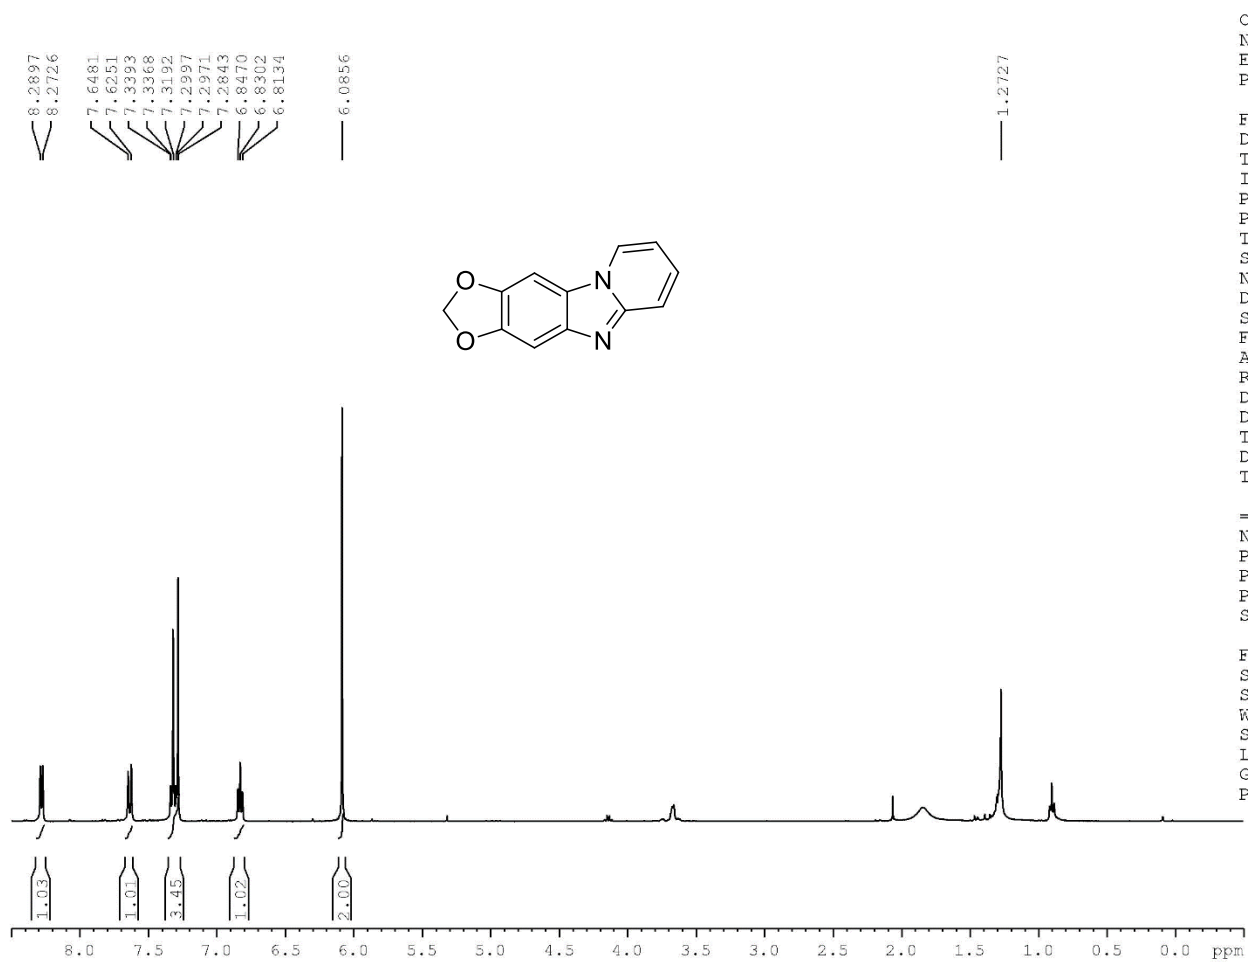



### <sup>13</sup>C NMR spectra of compound 3f

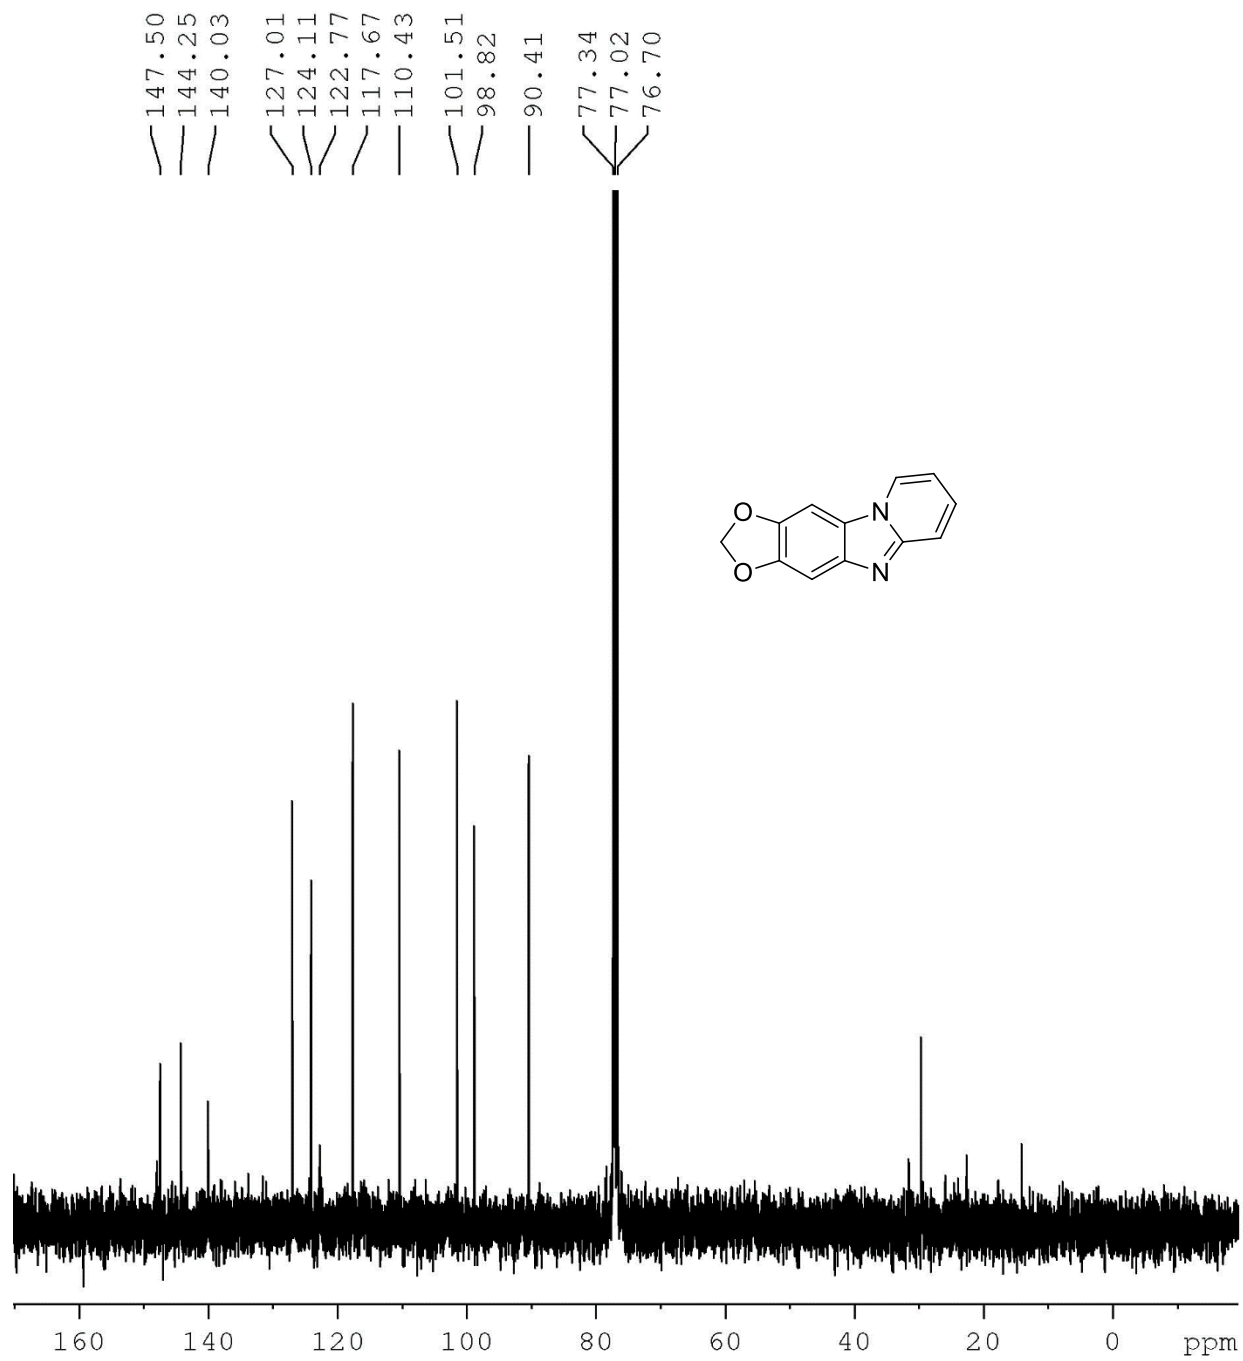

# <sup>1</sup>H NMR spectra of compound 3g

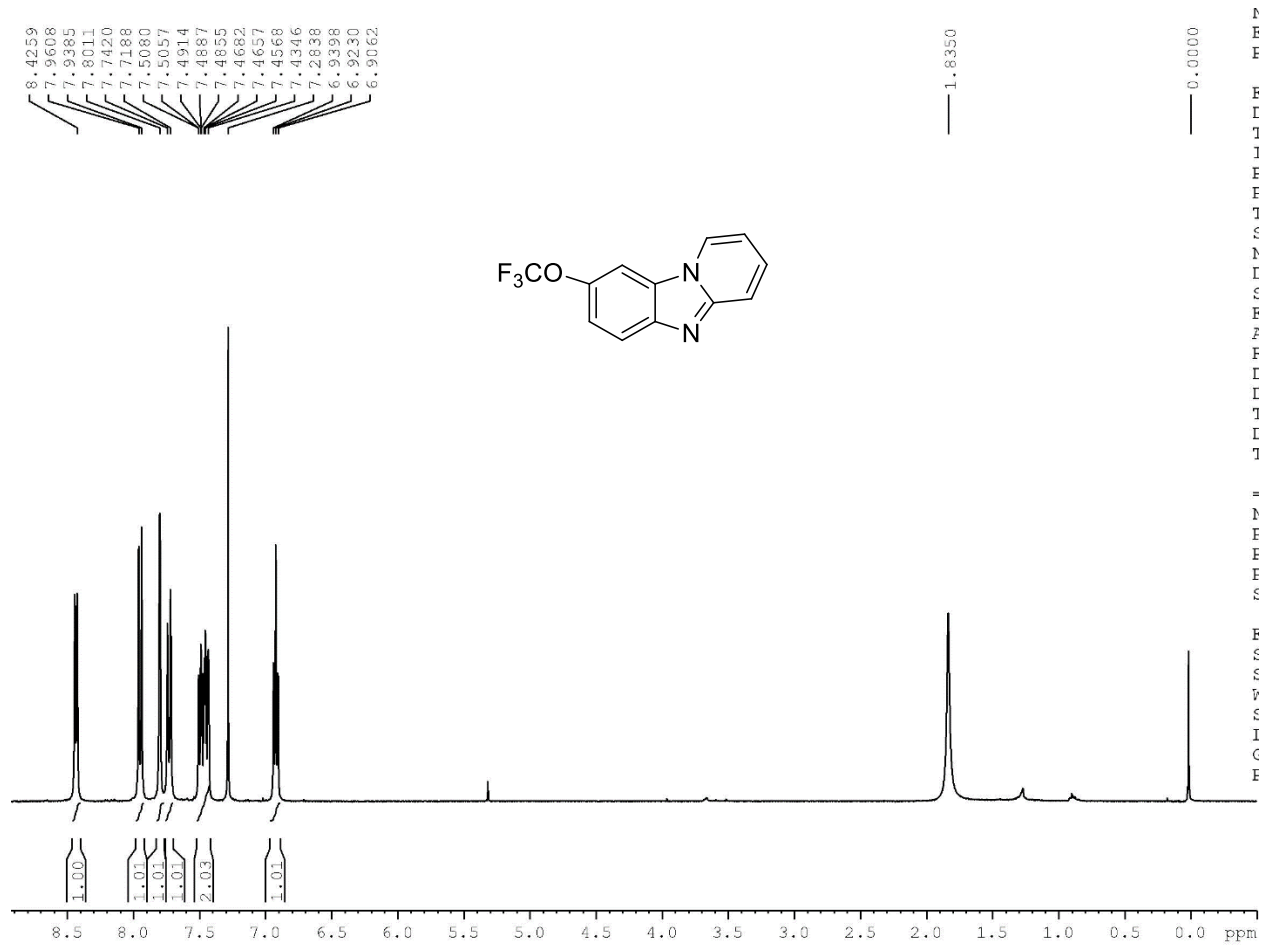

# <sup>13</sup>C NMR spectra of compound 3g

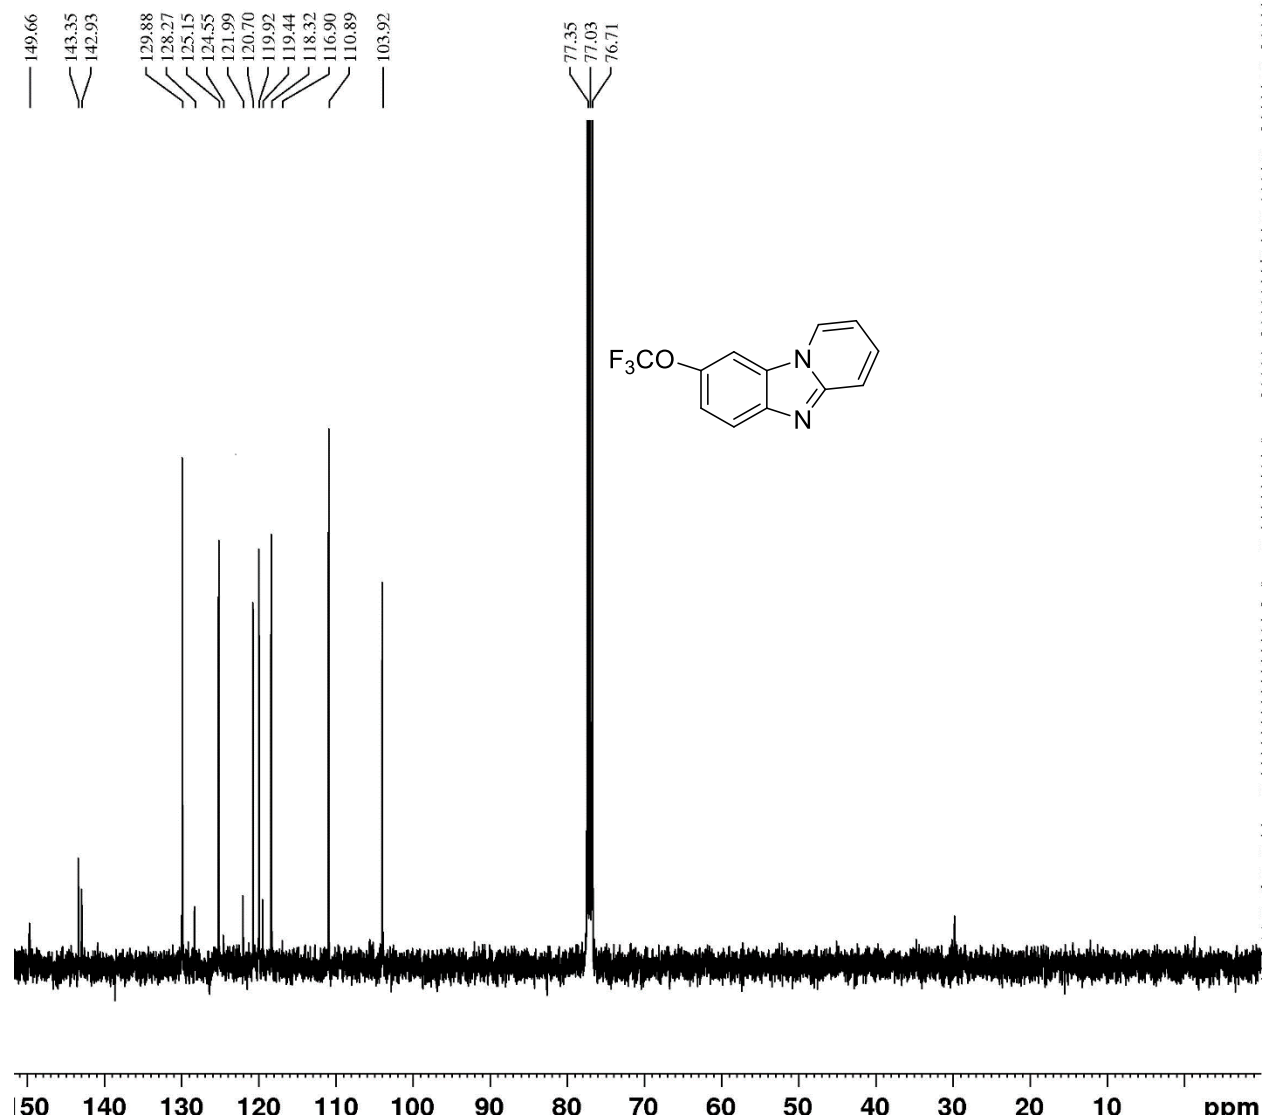

# <sup>1</sup>H NMR spectra of compound 3h

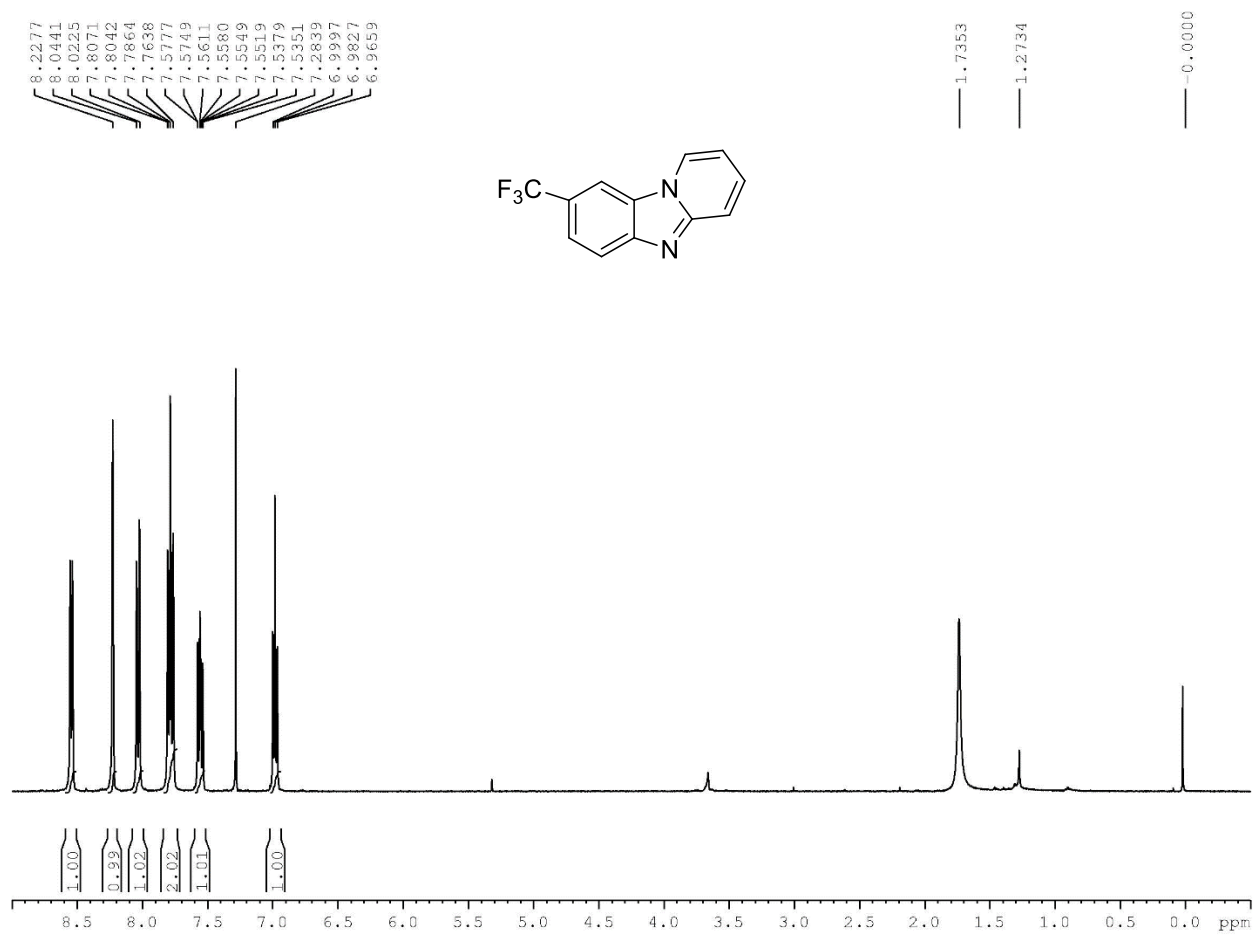

# <sup>13</sup>C NMR spectra of compound 3h

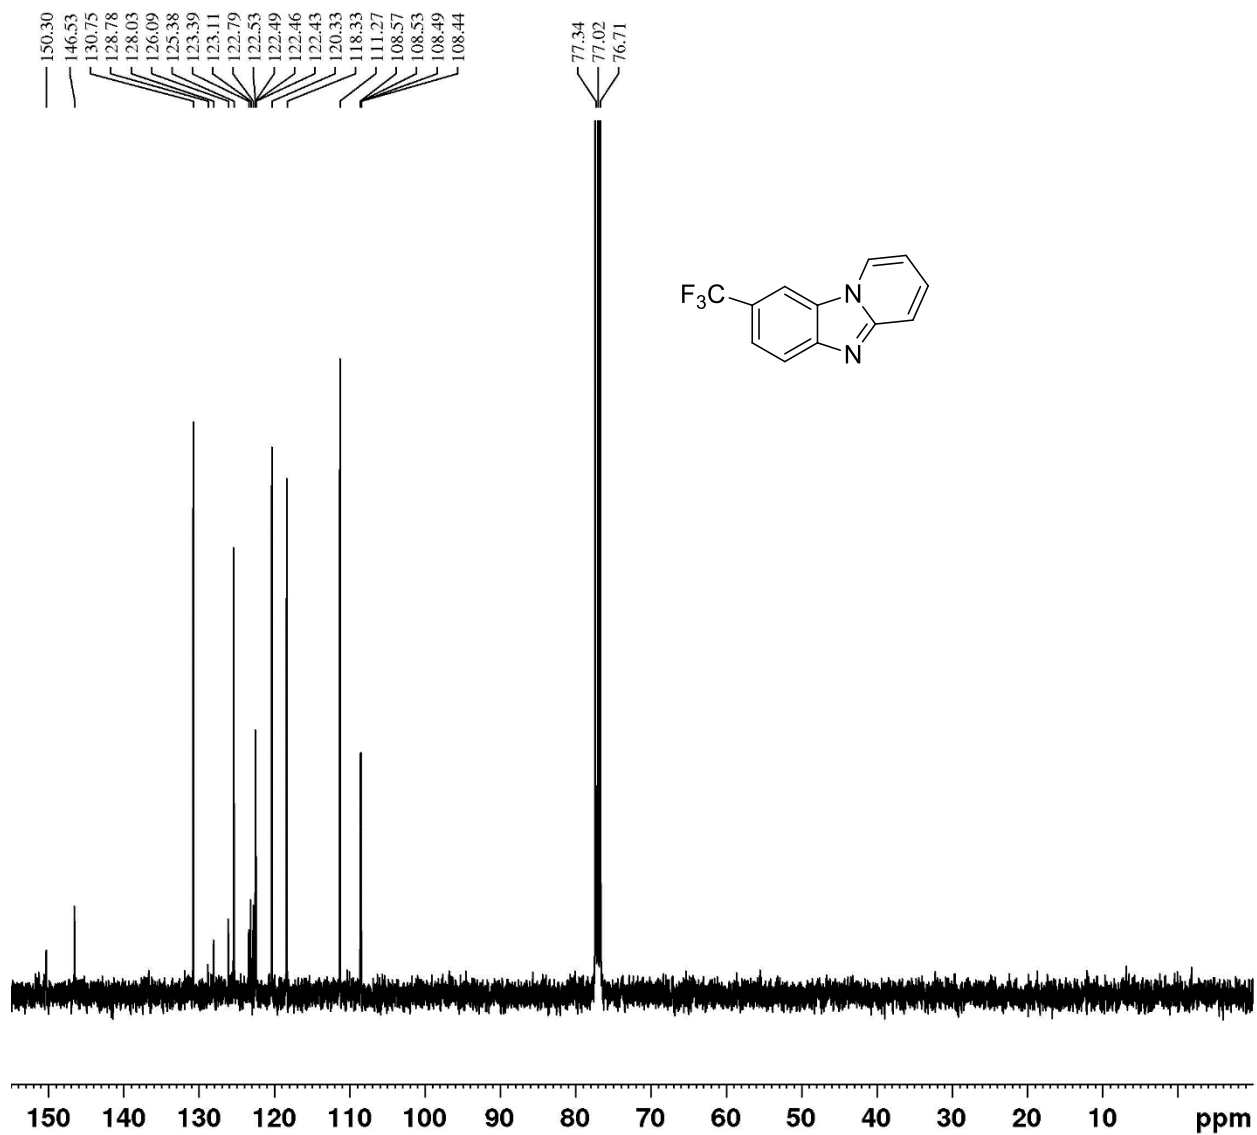

# <sup>1</sup>H NMR spectra of compound 3i

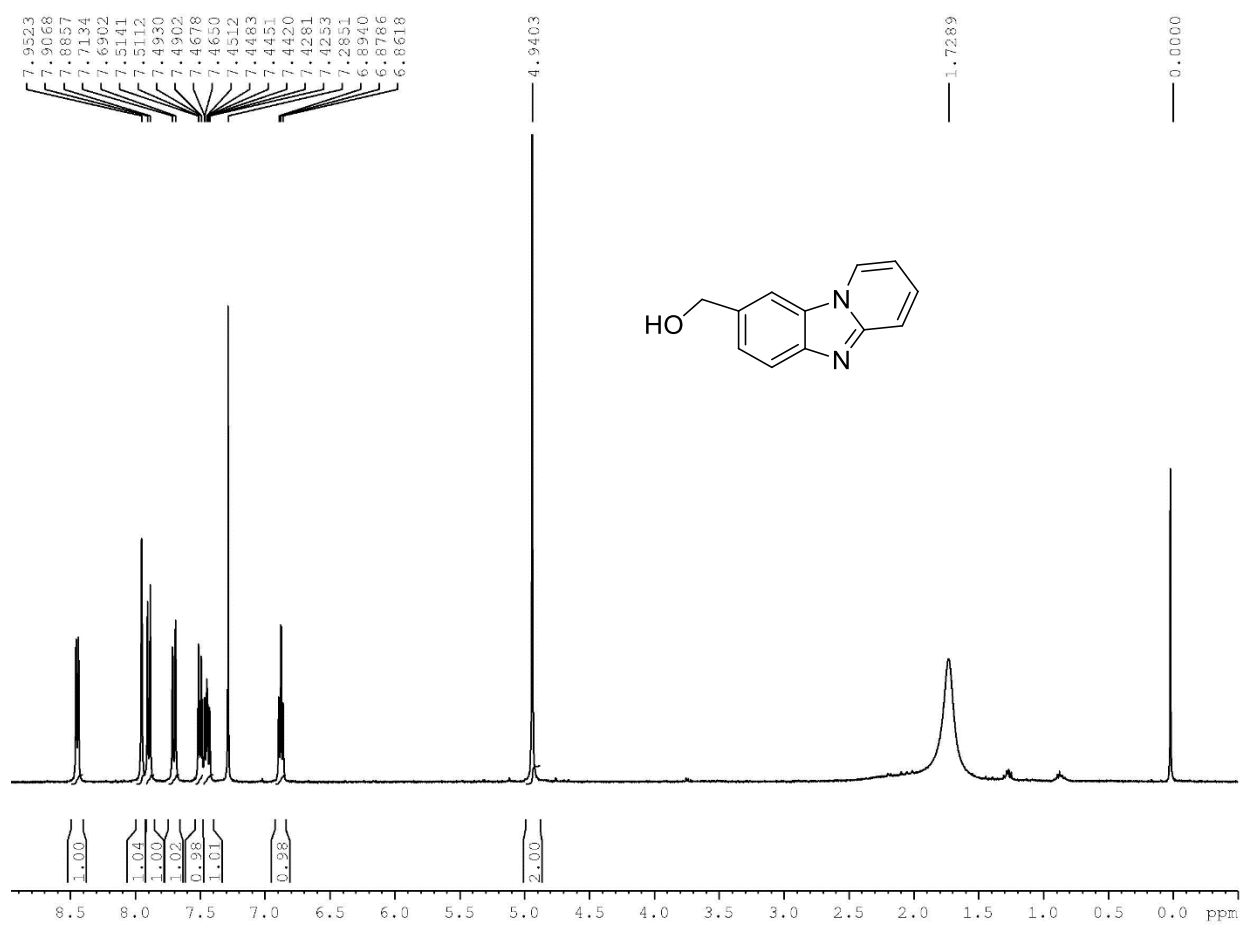

# $^{13}\text{C}$ NMR spectra of compound 3i

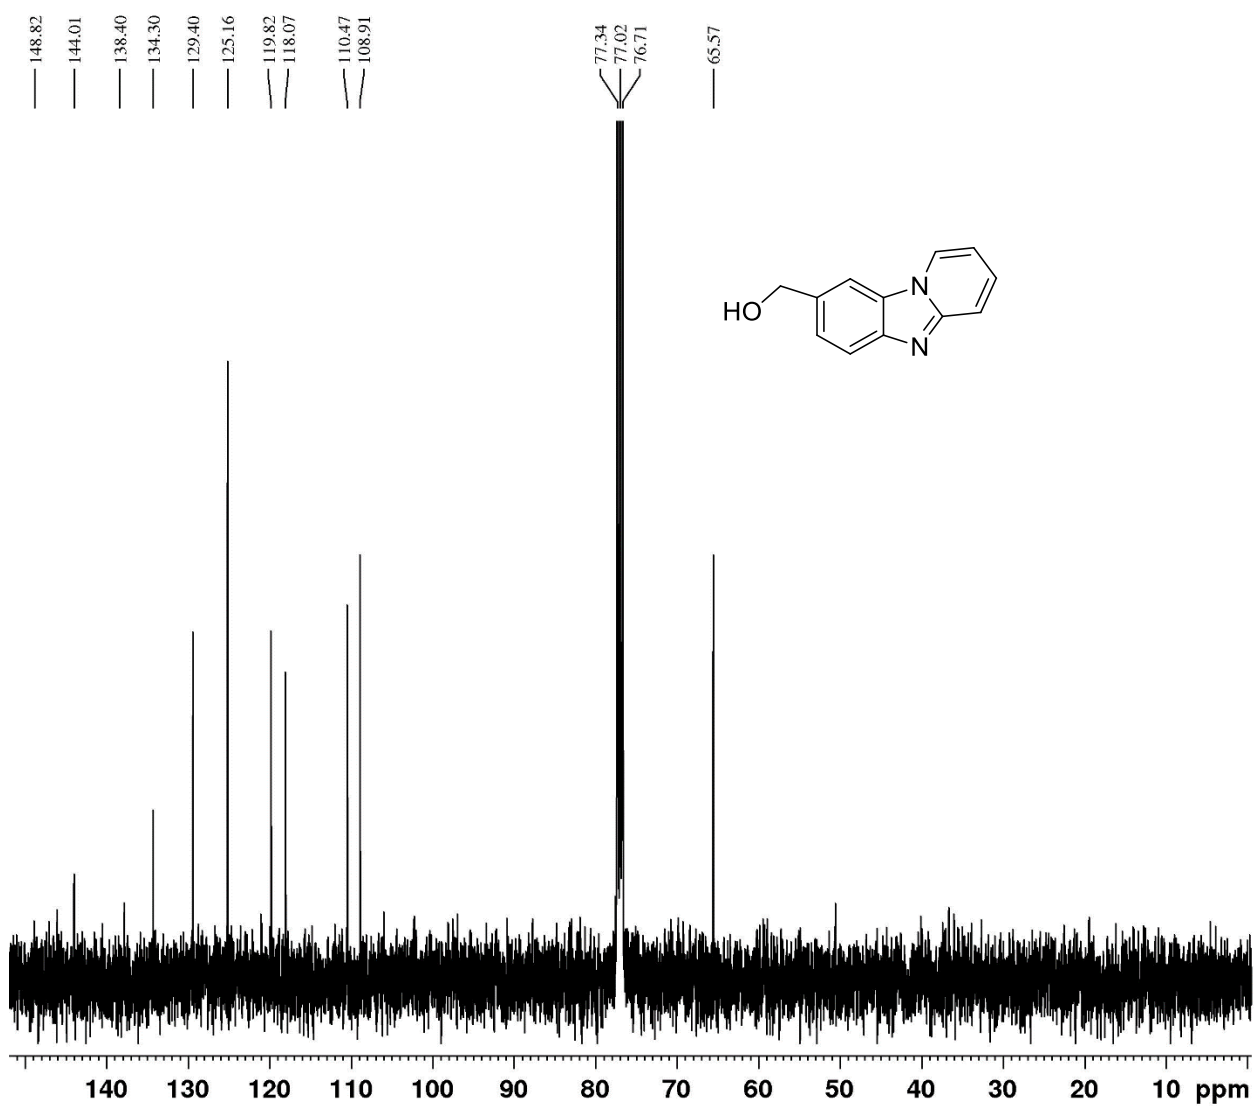

# <sup>1</sup>H NMR spectra of compound 3j

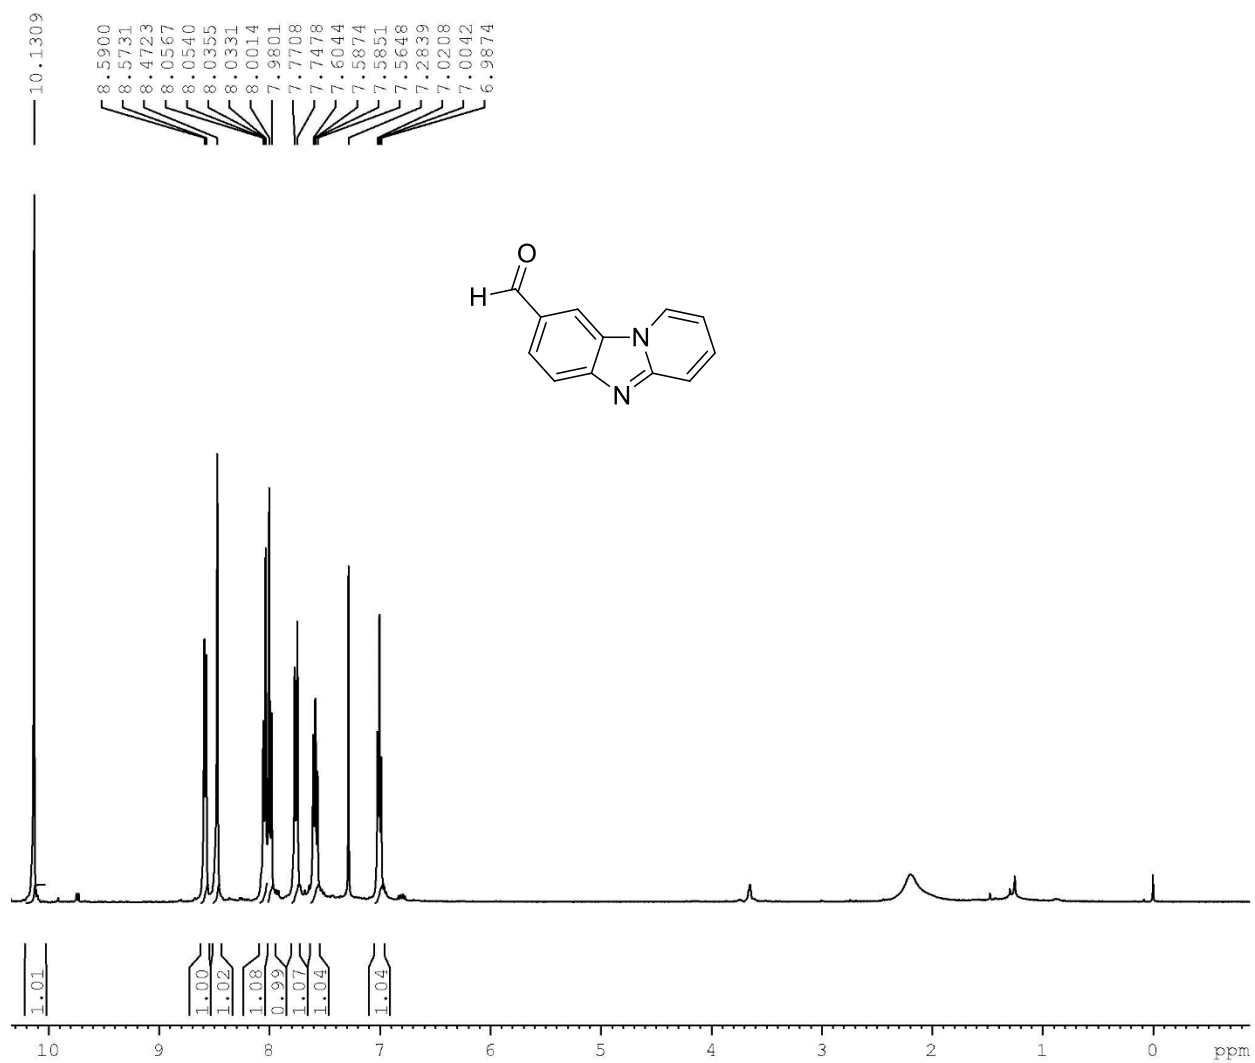



### $^{13}\text{C}$ NMR spectra of compound 3j

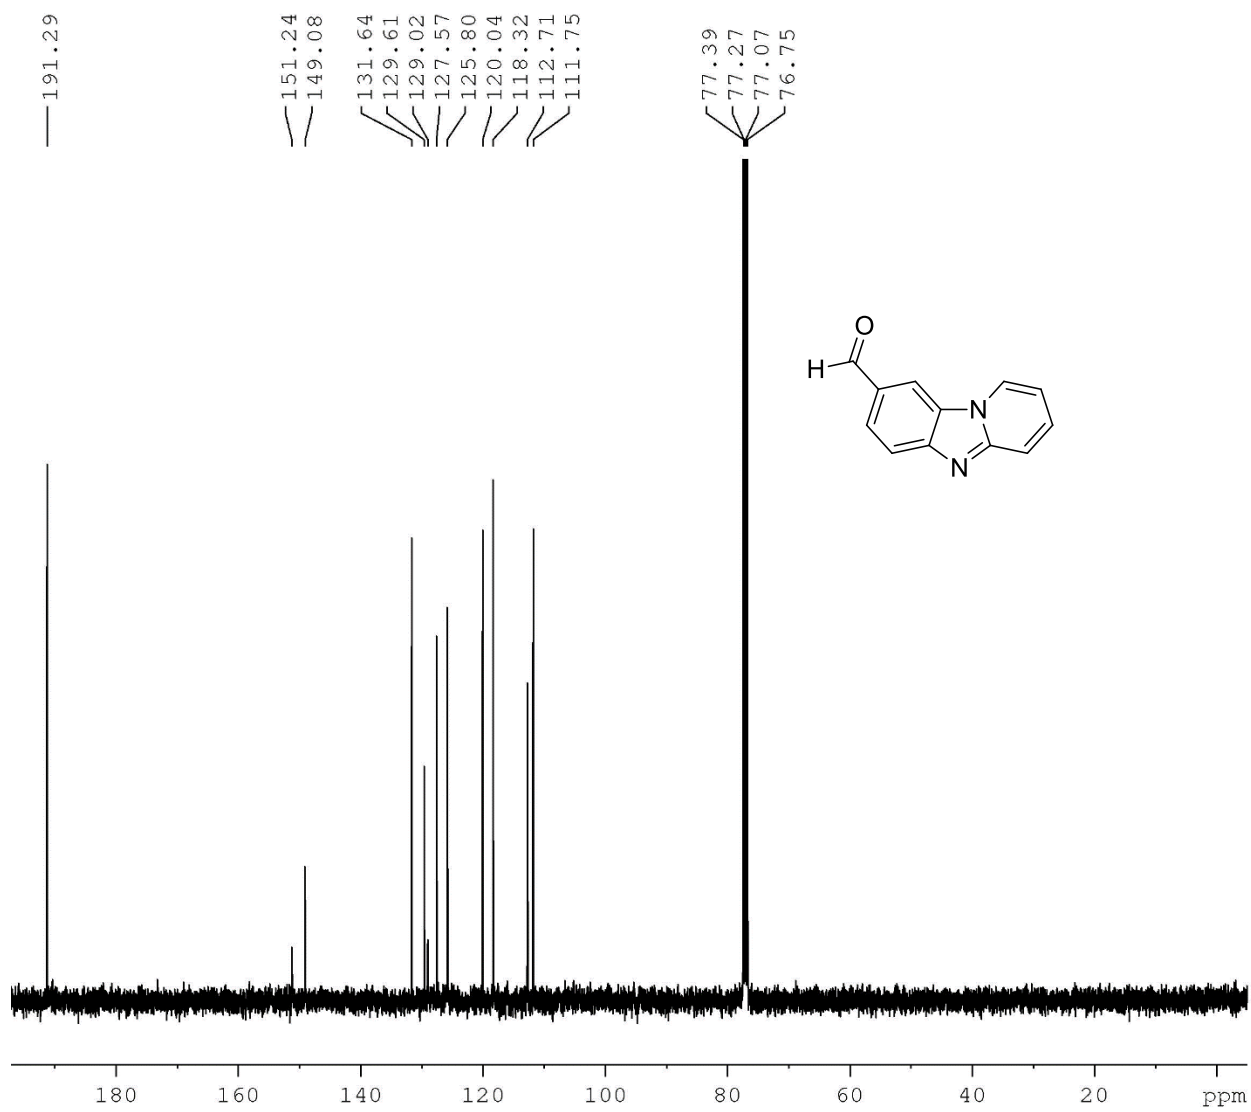

# <sup>1</sup>H NMR spectra of compound 3k

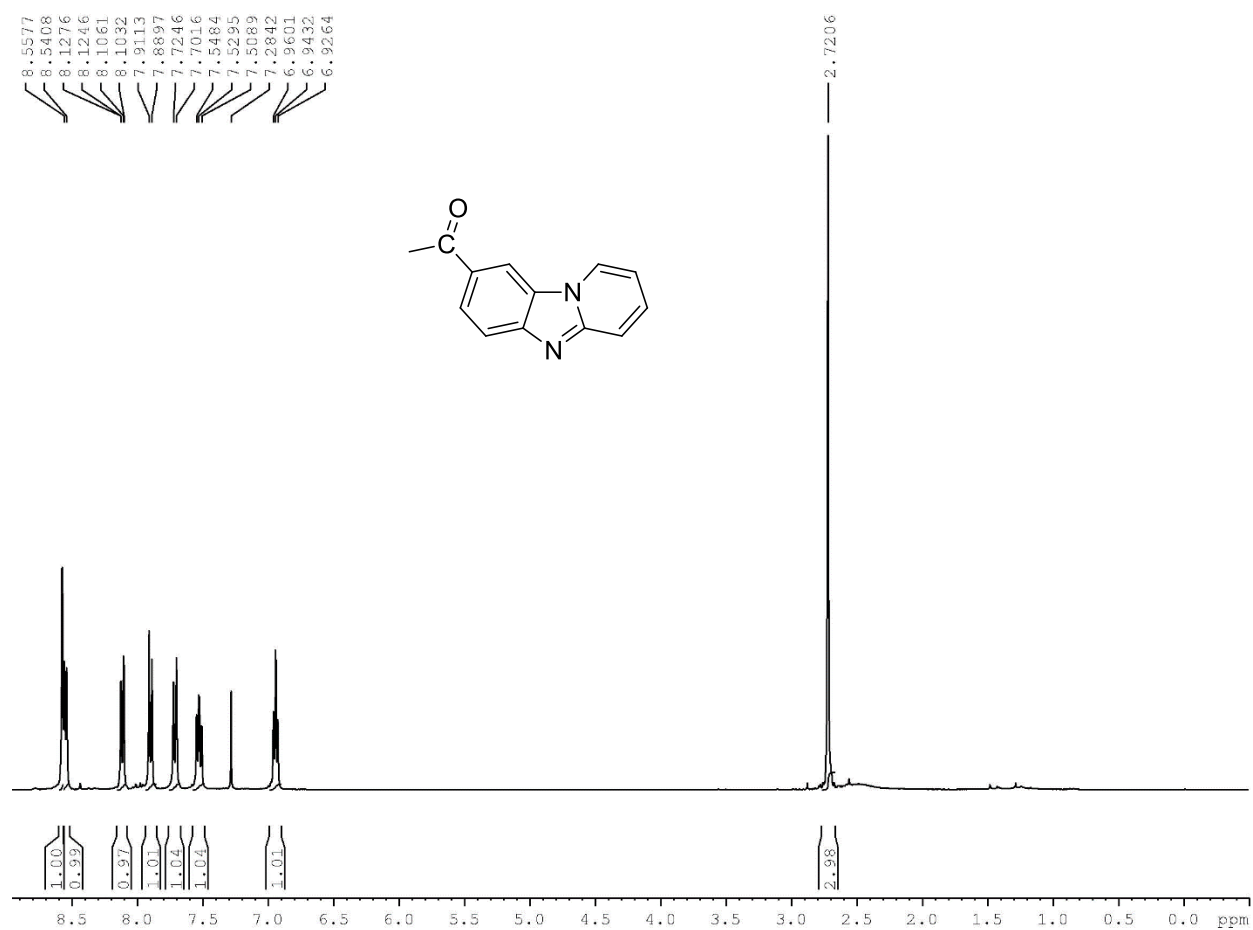

### <sup>13</sup>C NMR spectra of compound 3k

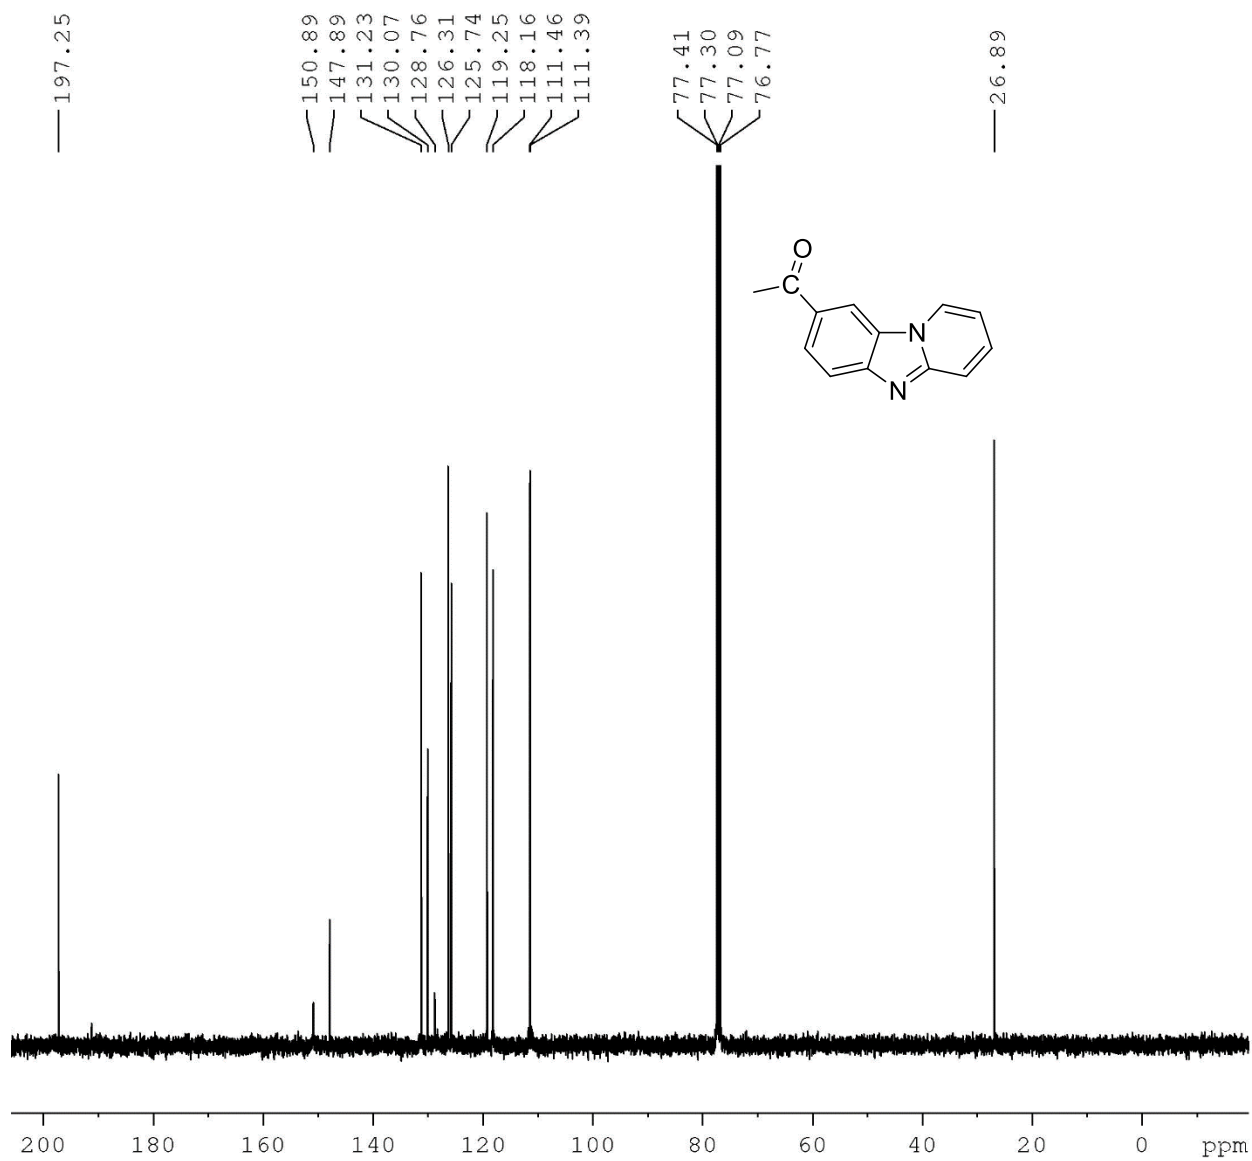

# <sup>1</sup>H NMR spectra of compound 3l

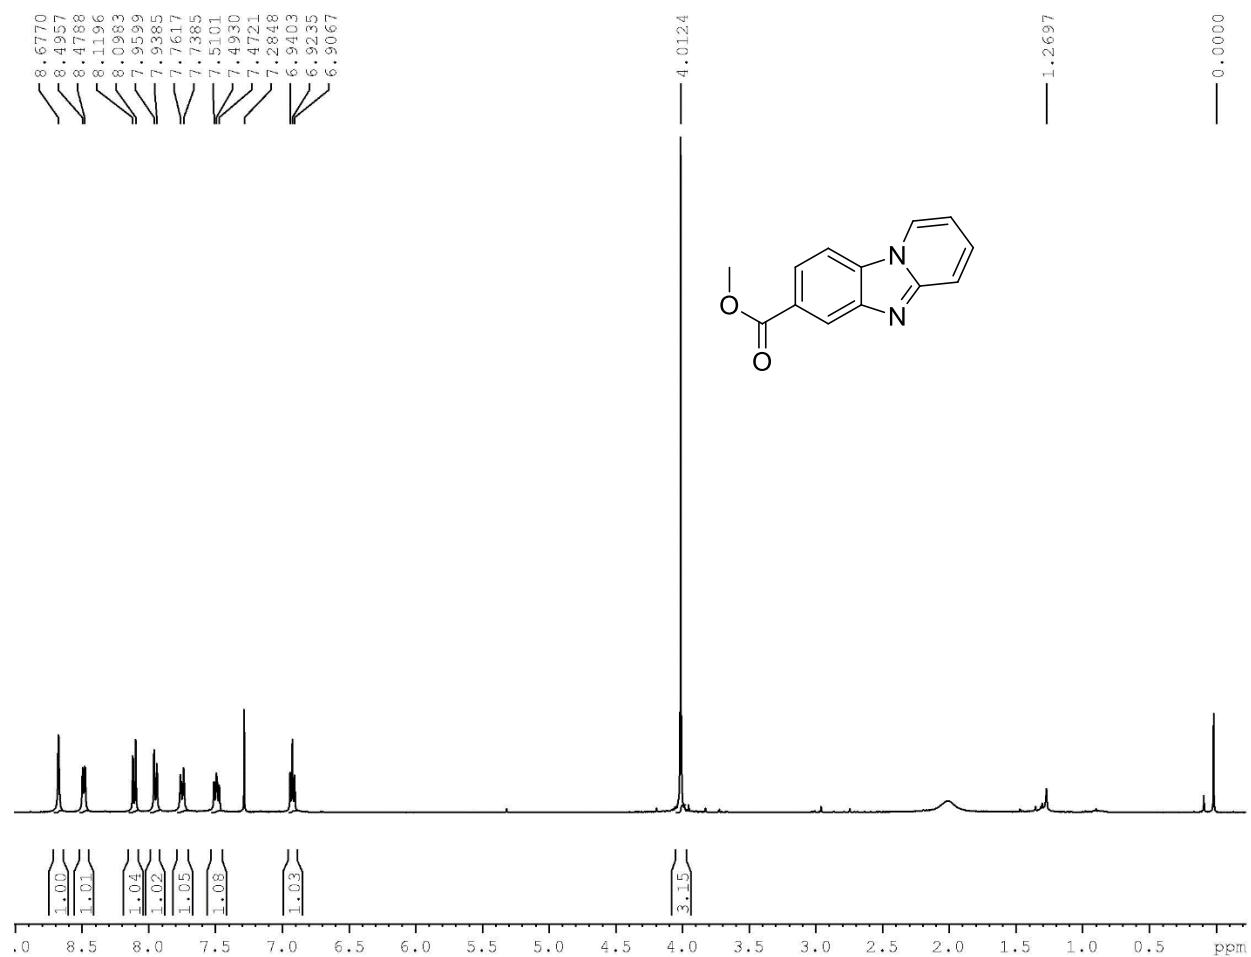

# <sup>13</sup>C NMR spectra of compound 31

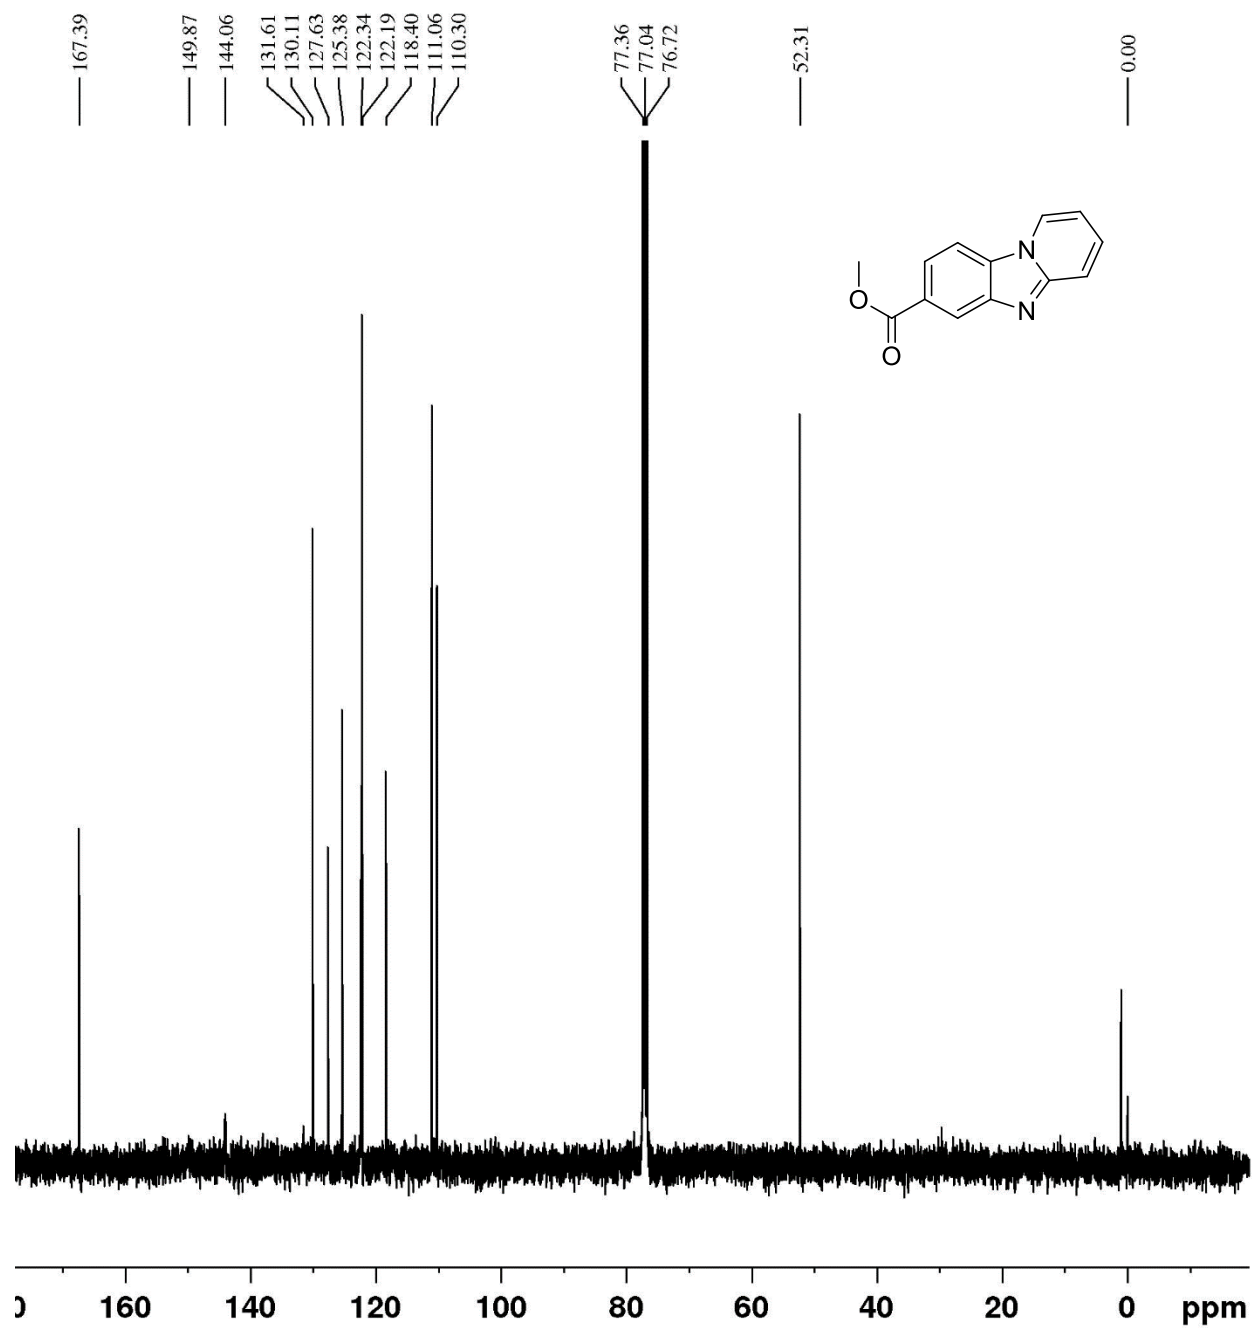

### <sup>1</sup>H NMR spectra of compound 3m

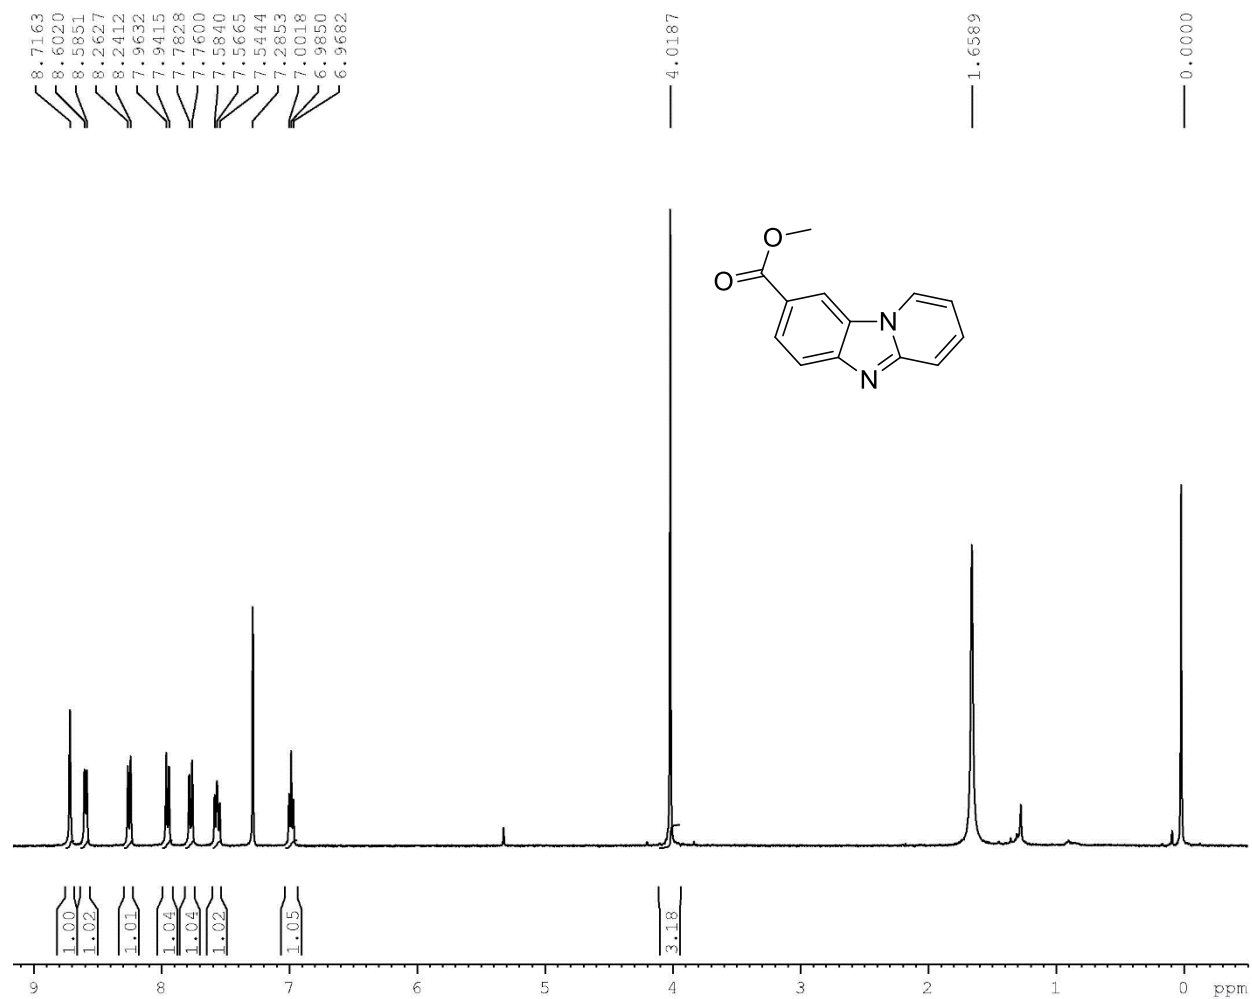

# <sup>13</sup>C NMR spectra of compound 3m

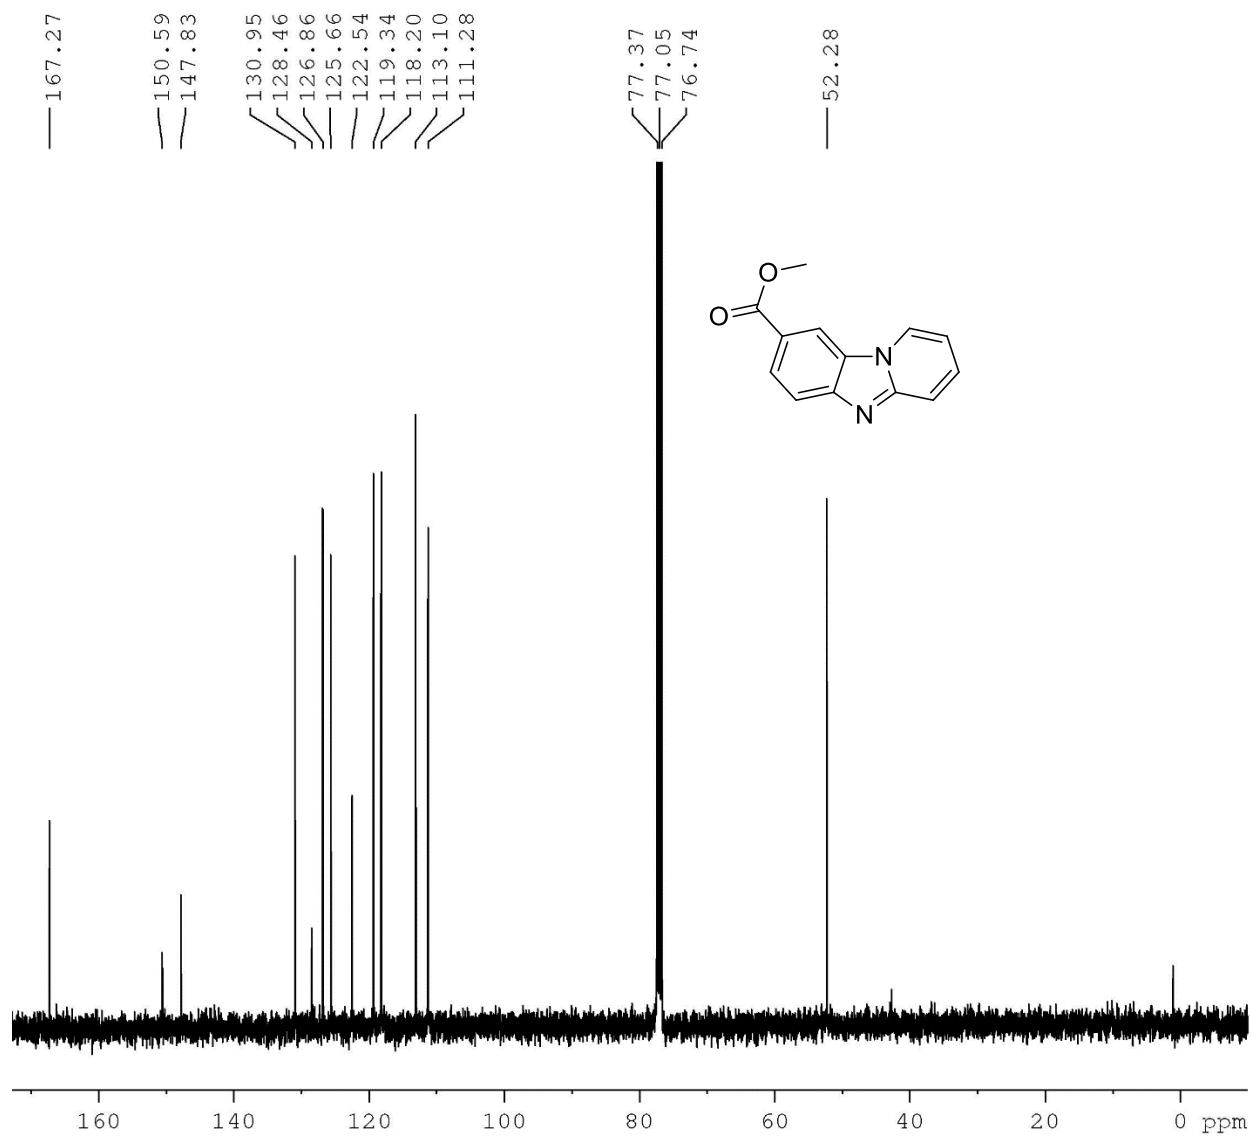

# <sup>1</sup>H NMR spectra of compound 3n

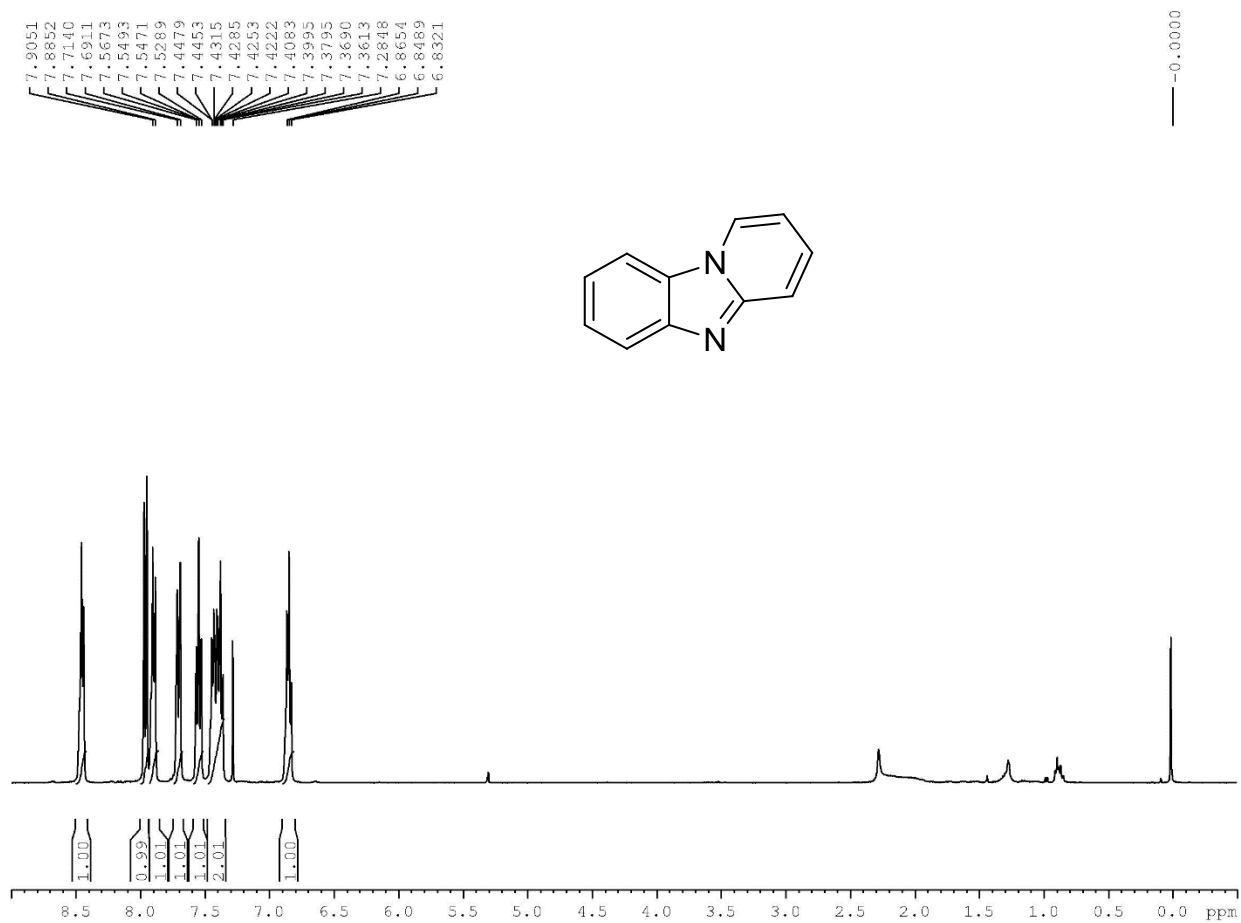



# <sup>13</sup>C NMR spectra of compound 3n

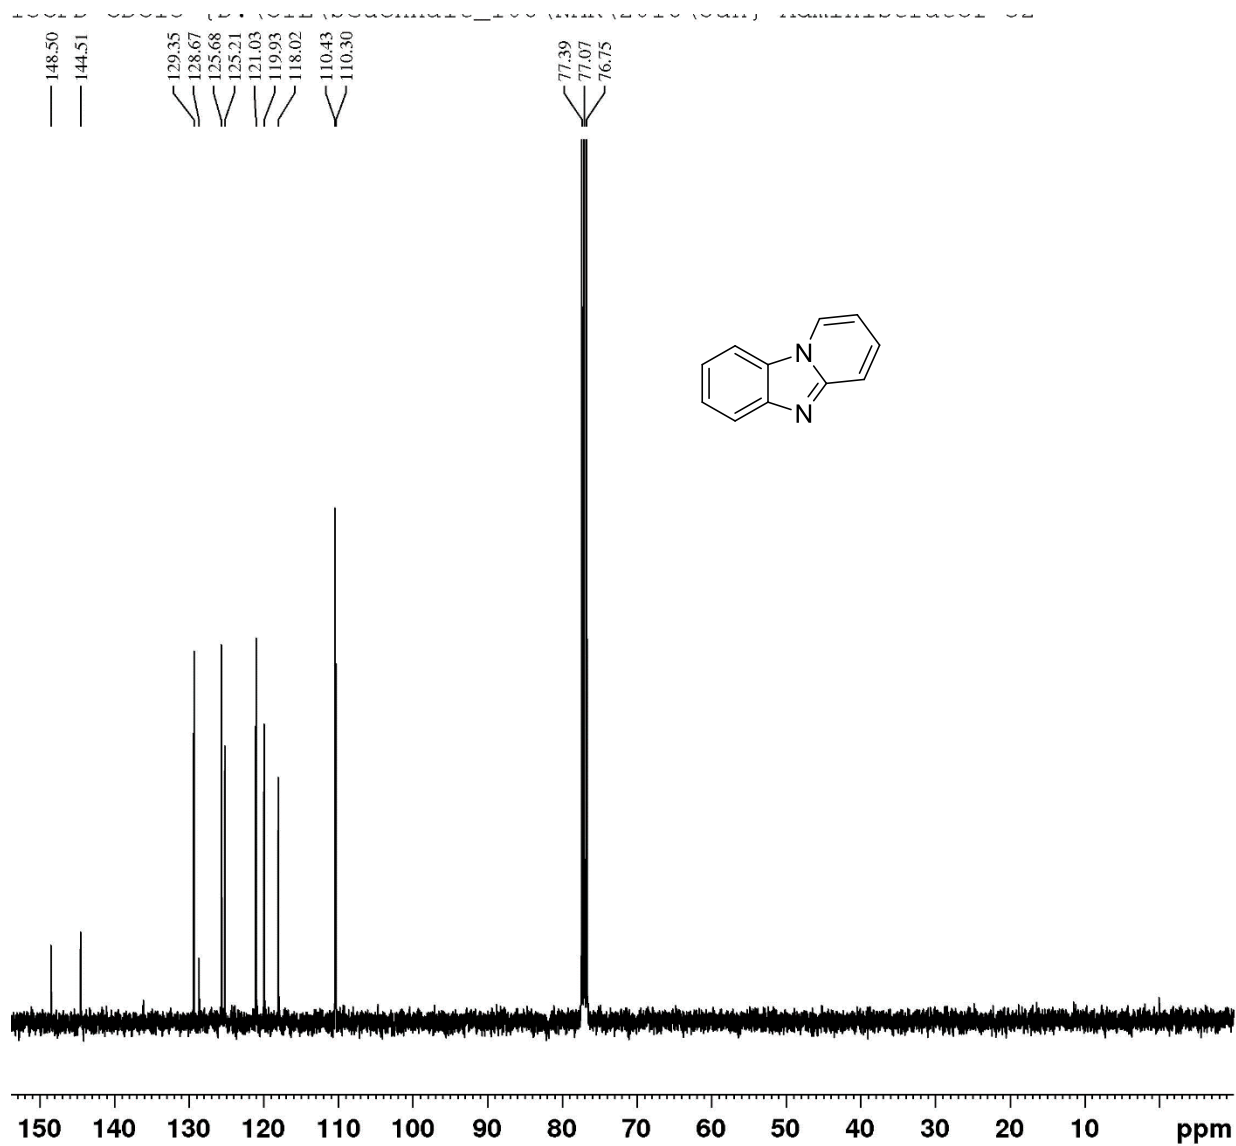

# <sup>1</sup>H NMR spectra of compound 3o

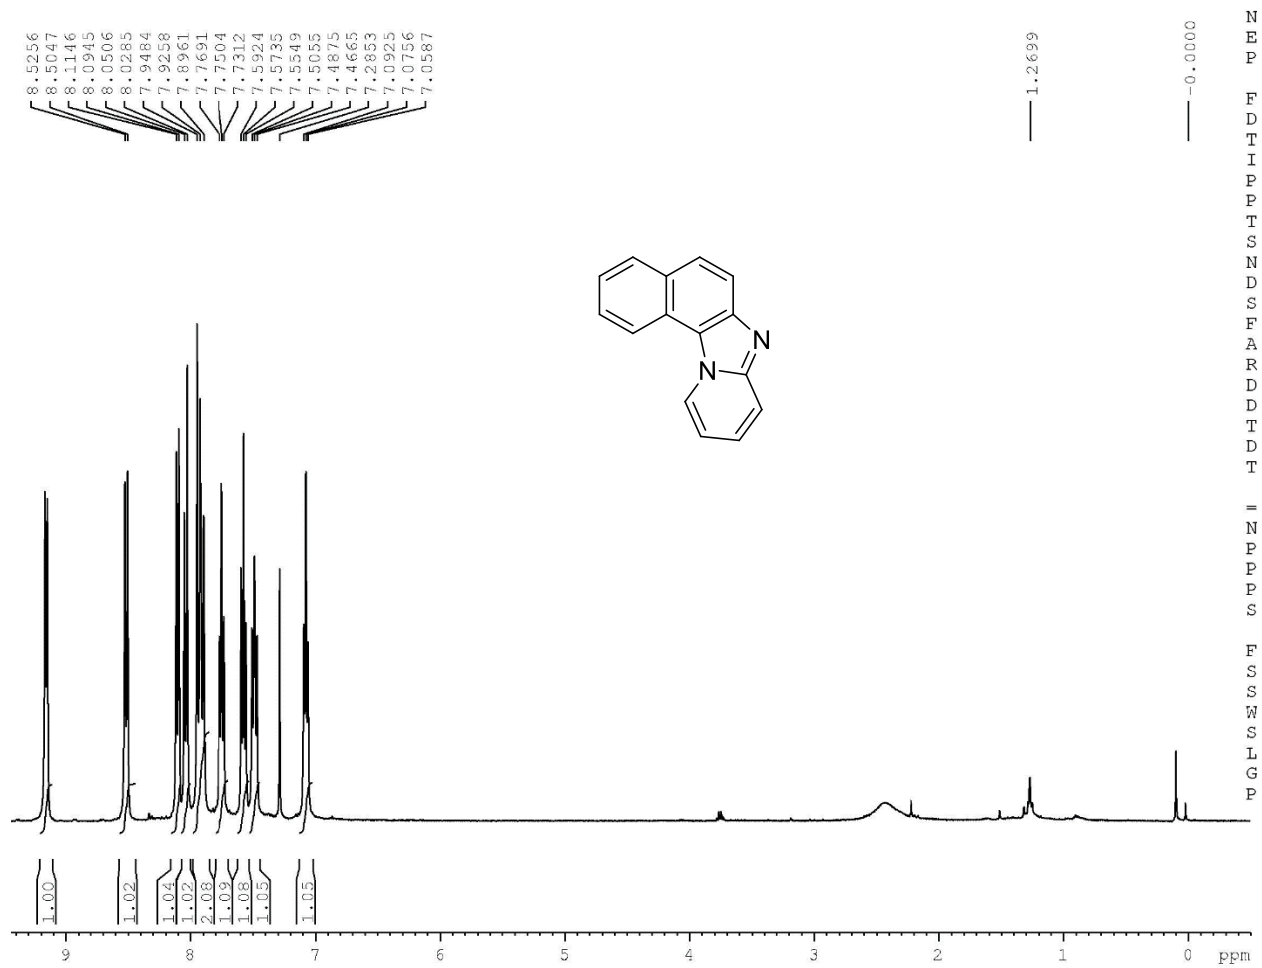

# <sup>13</sup>C NMR spectra of compound 3o

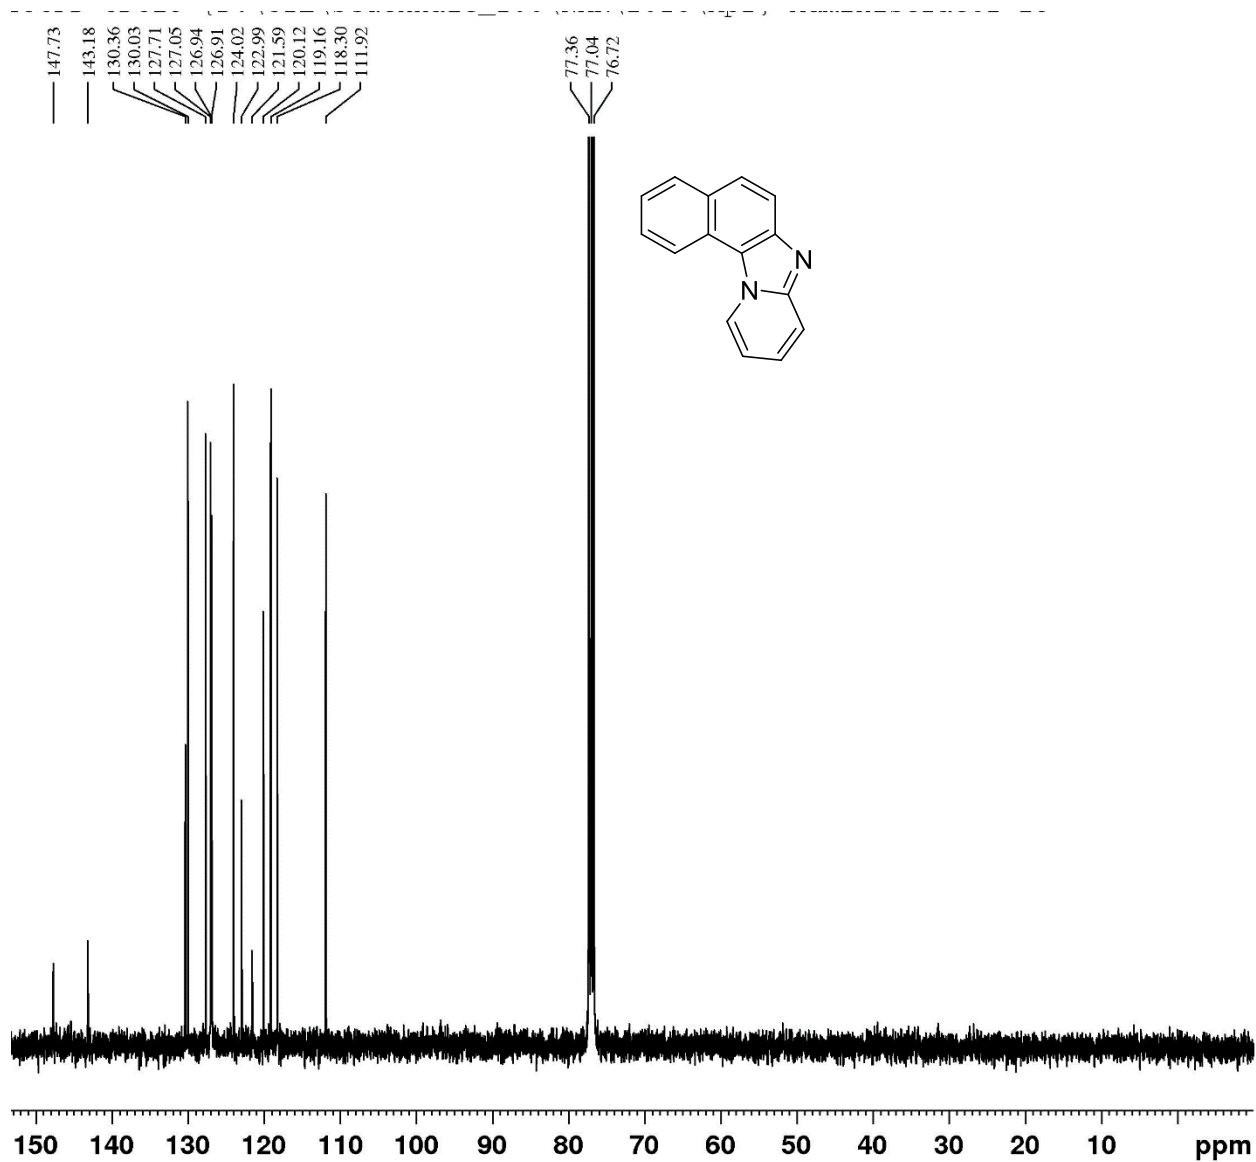

# <sup>1</sup>H NMR spectra of compound 3p

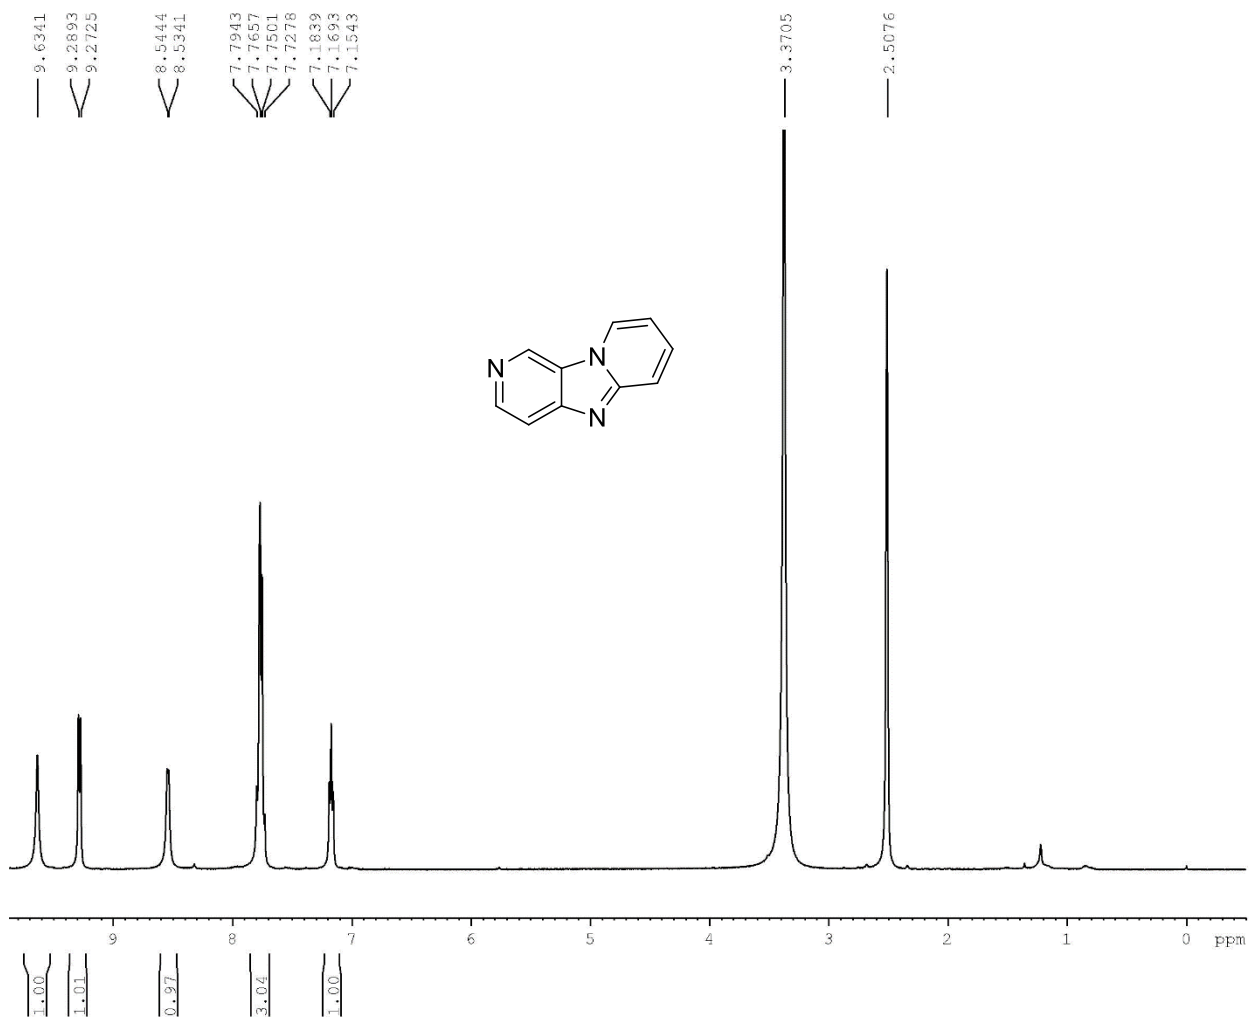

### <sup>13</sup>C NMR spectra of compound 3p

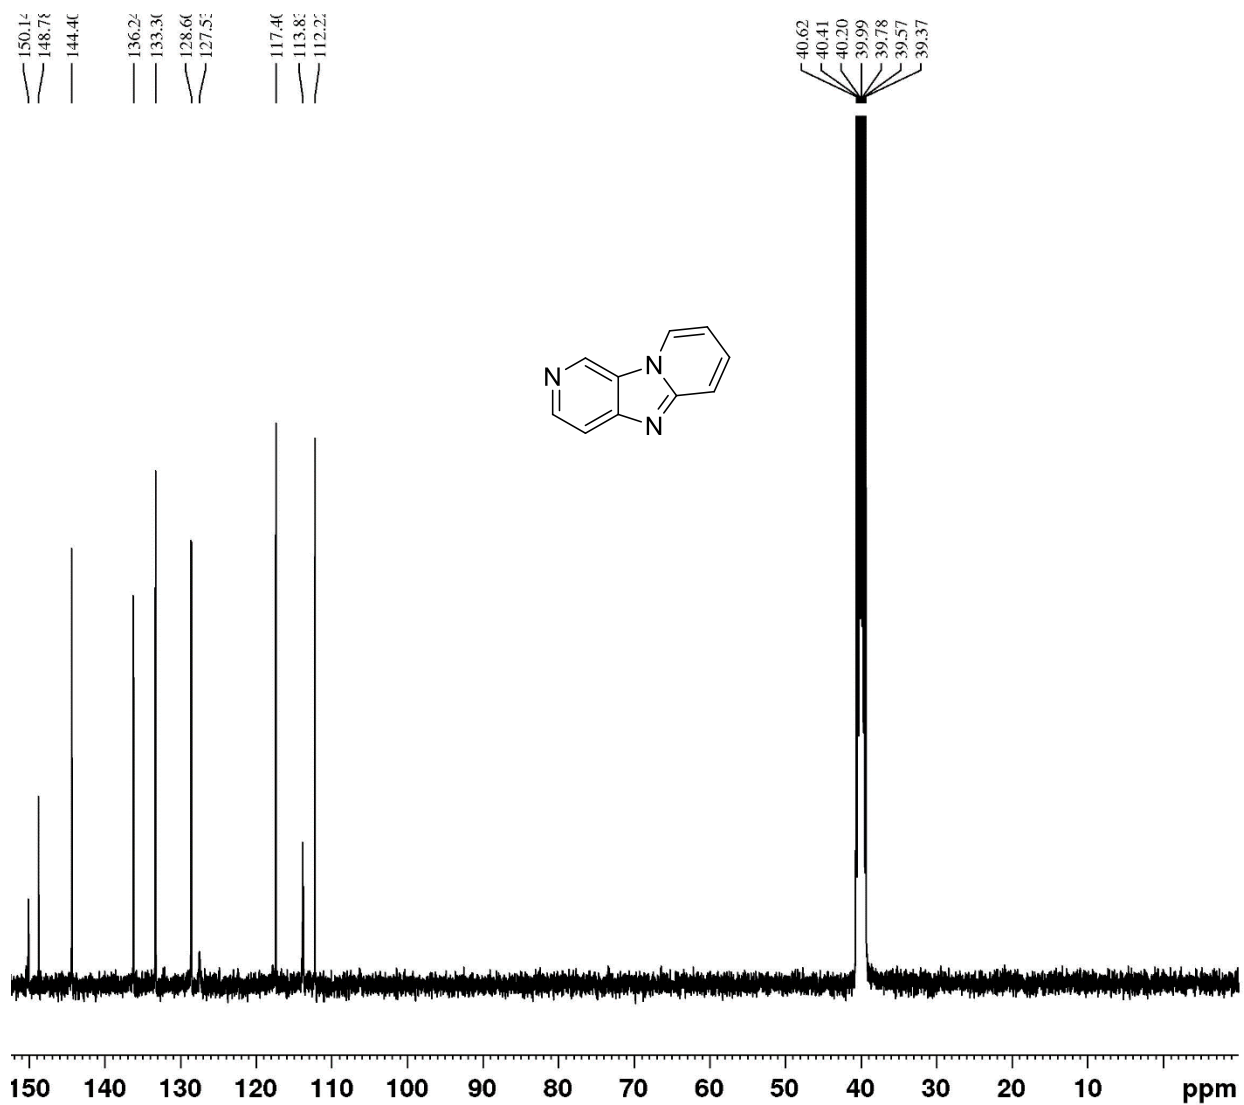

# <sup>1</sup>H NMR spectra of compound 3q

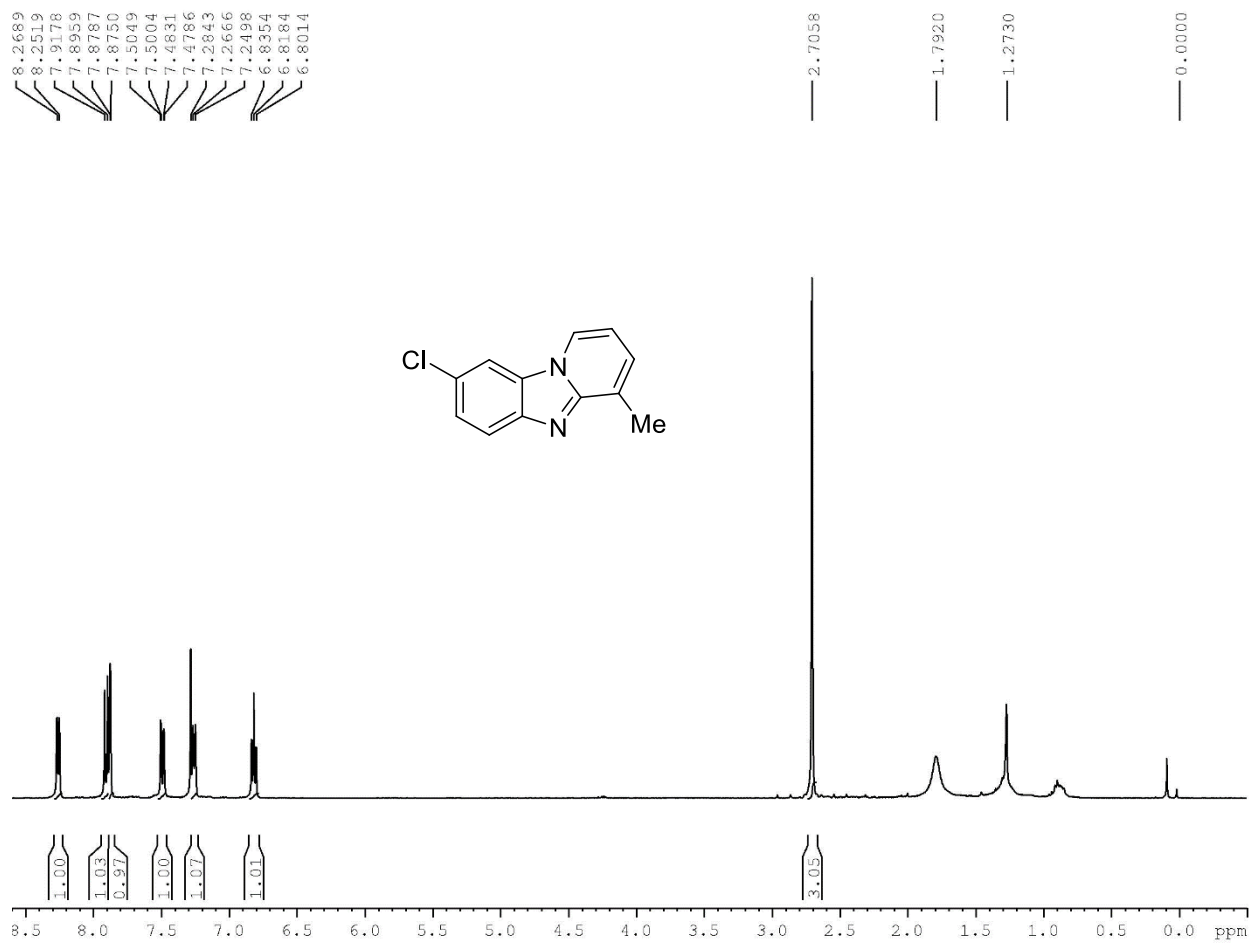

# <sup>13</sup>C NMR spectra of compound 3q

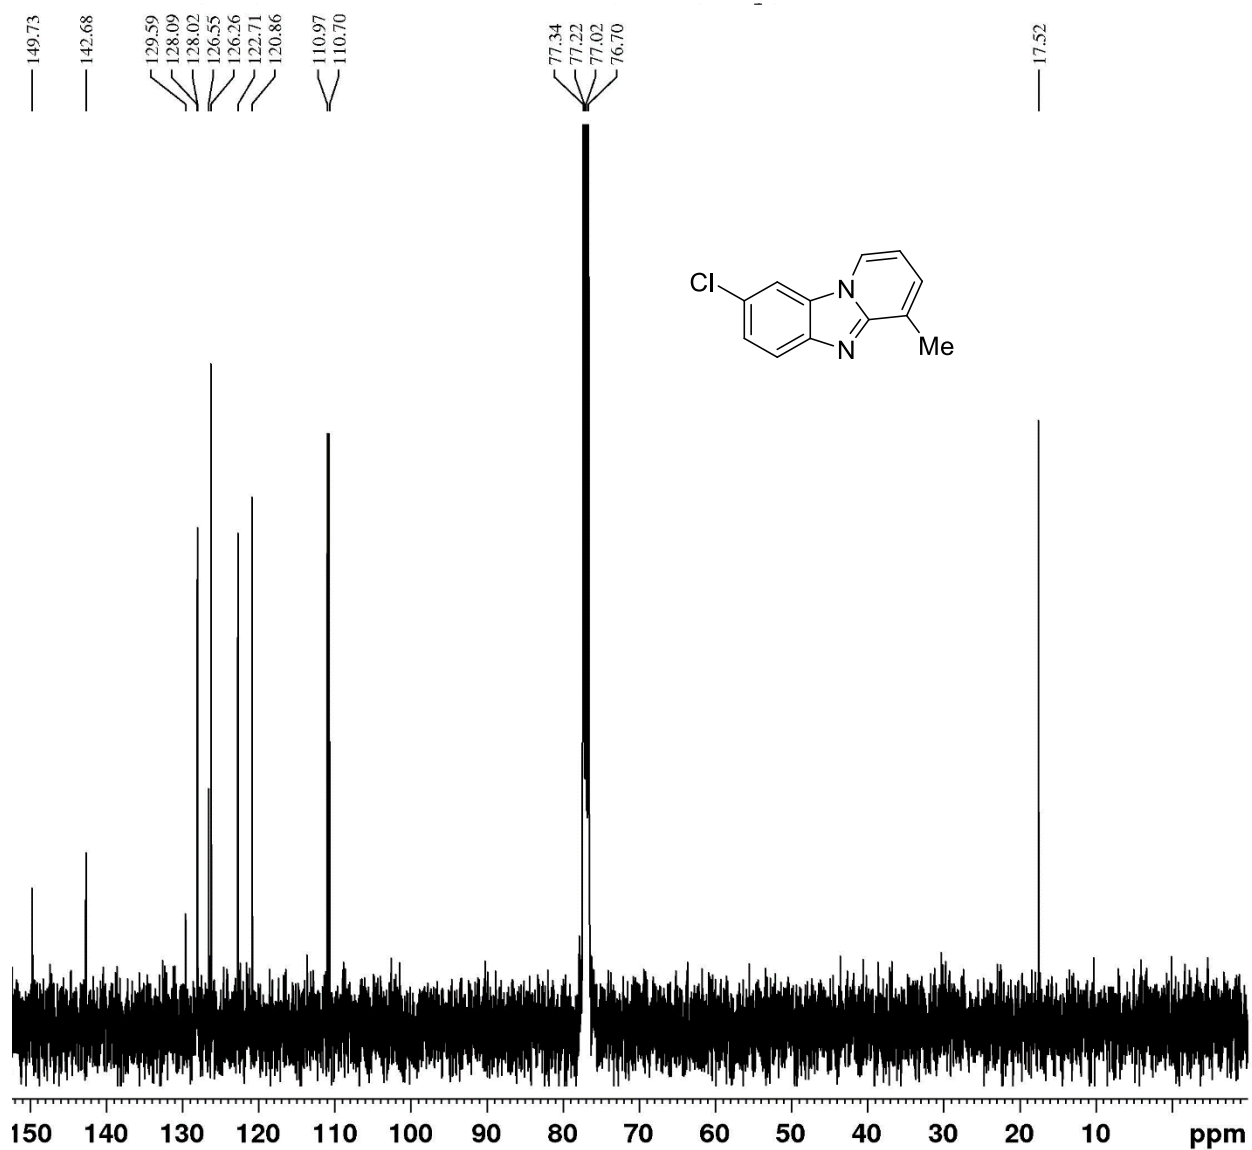

# <sup>1</sup>H NMR spectra of compound 3r

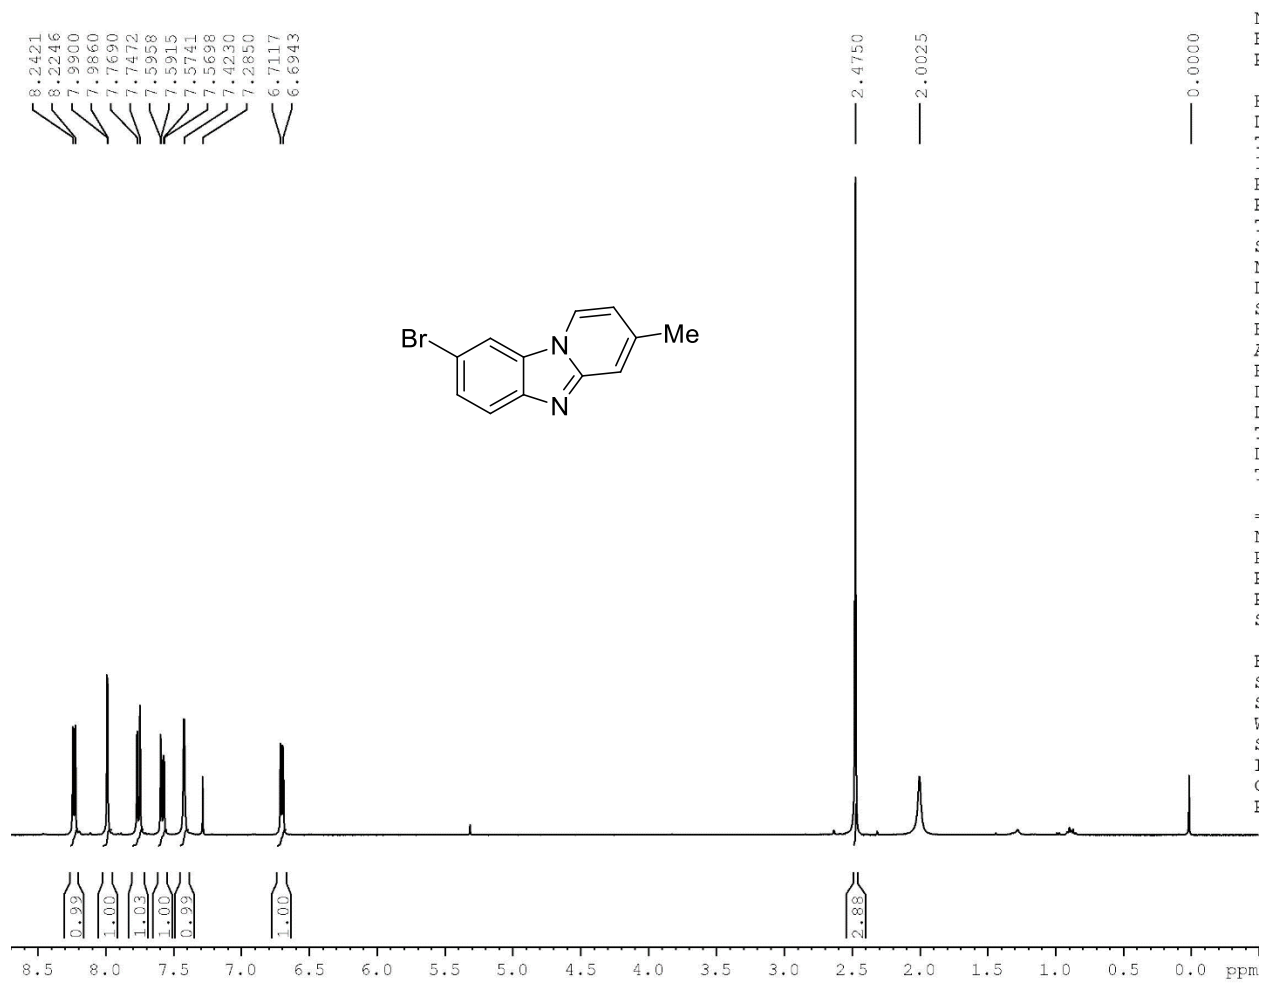



# <sup>13</sup>C NMR spectra of compound 3r

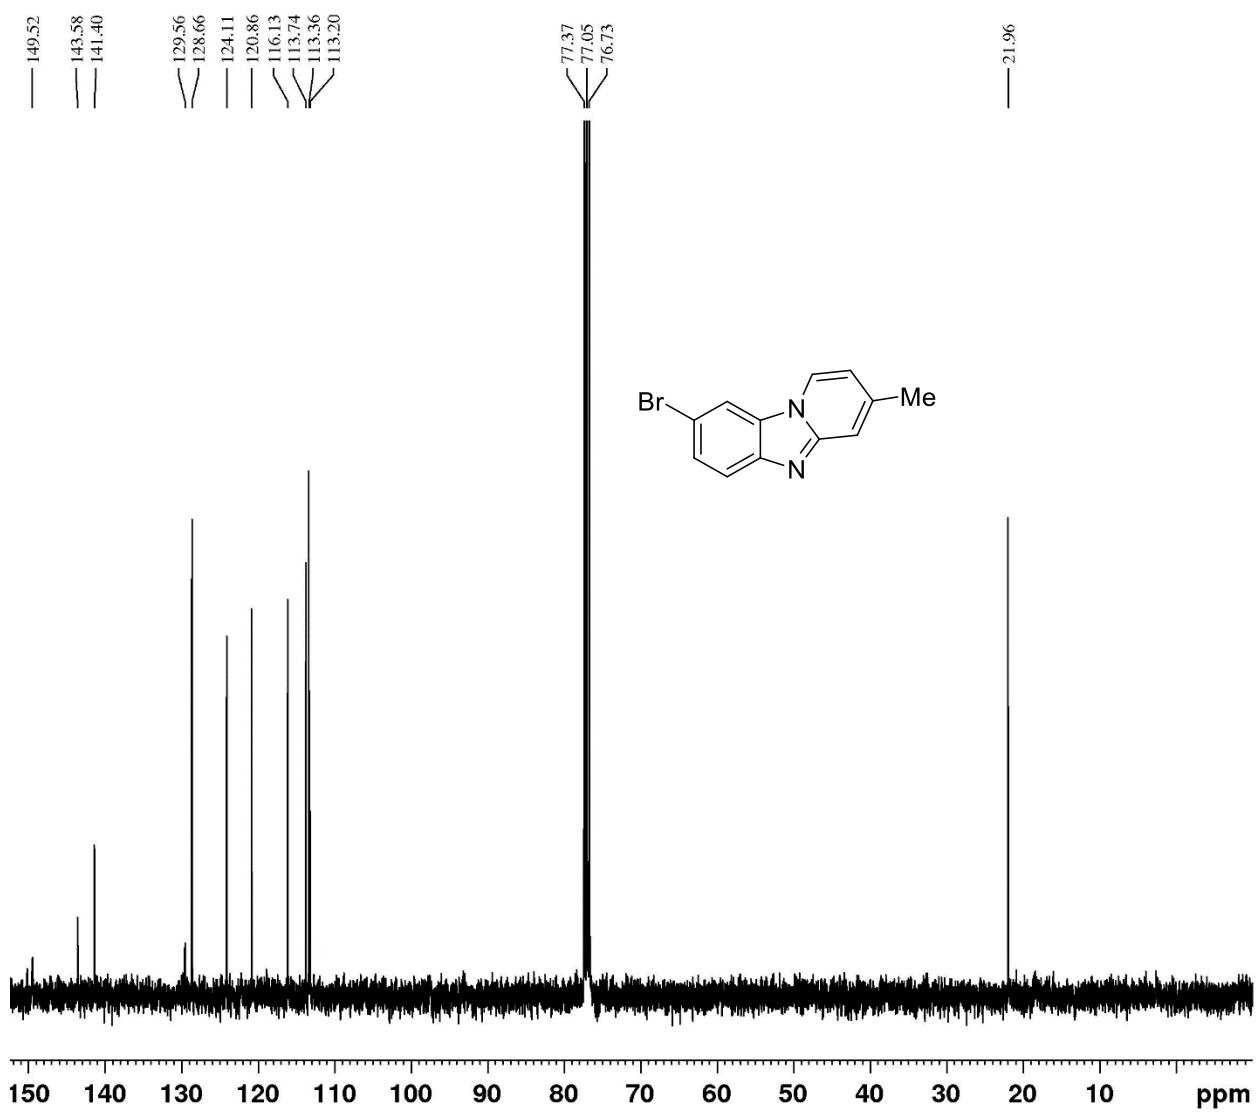

# <sup>1</sup>H NMR spectra of compound 3s

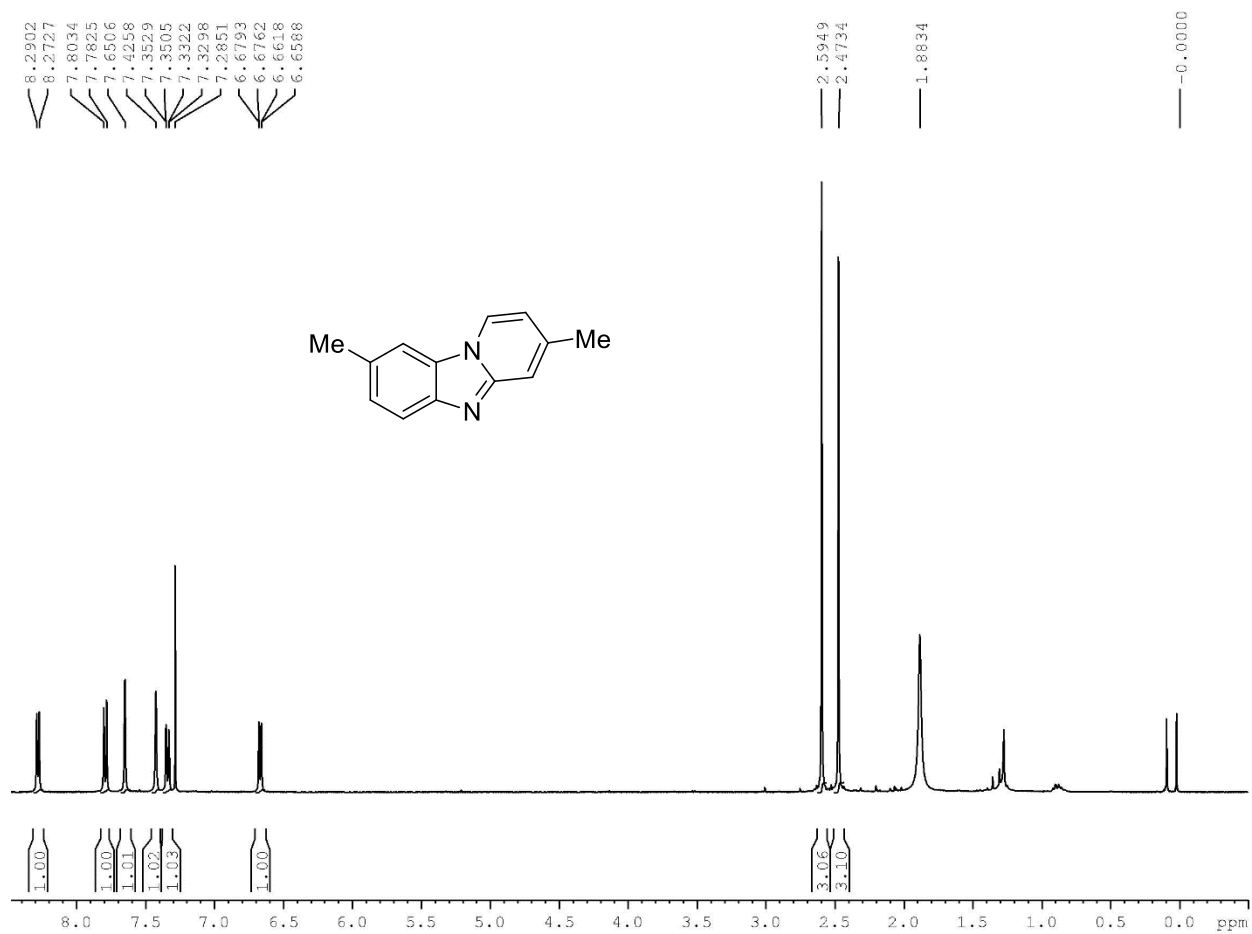

# <sup>13</sup>C NMR spectra of compound 3s

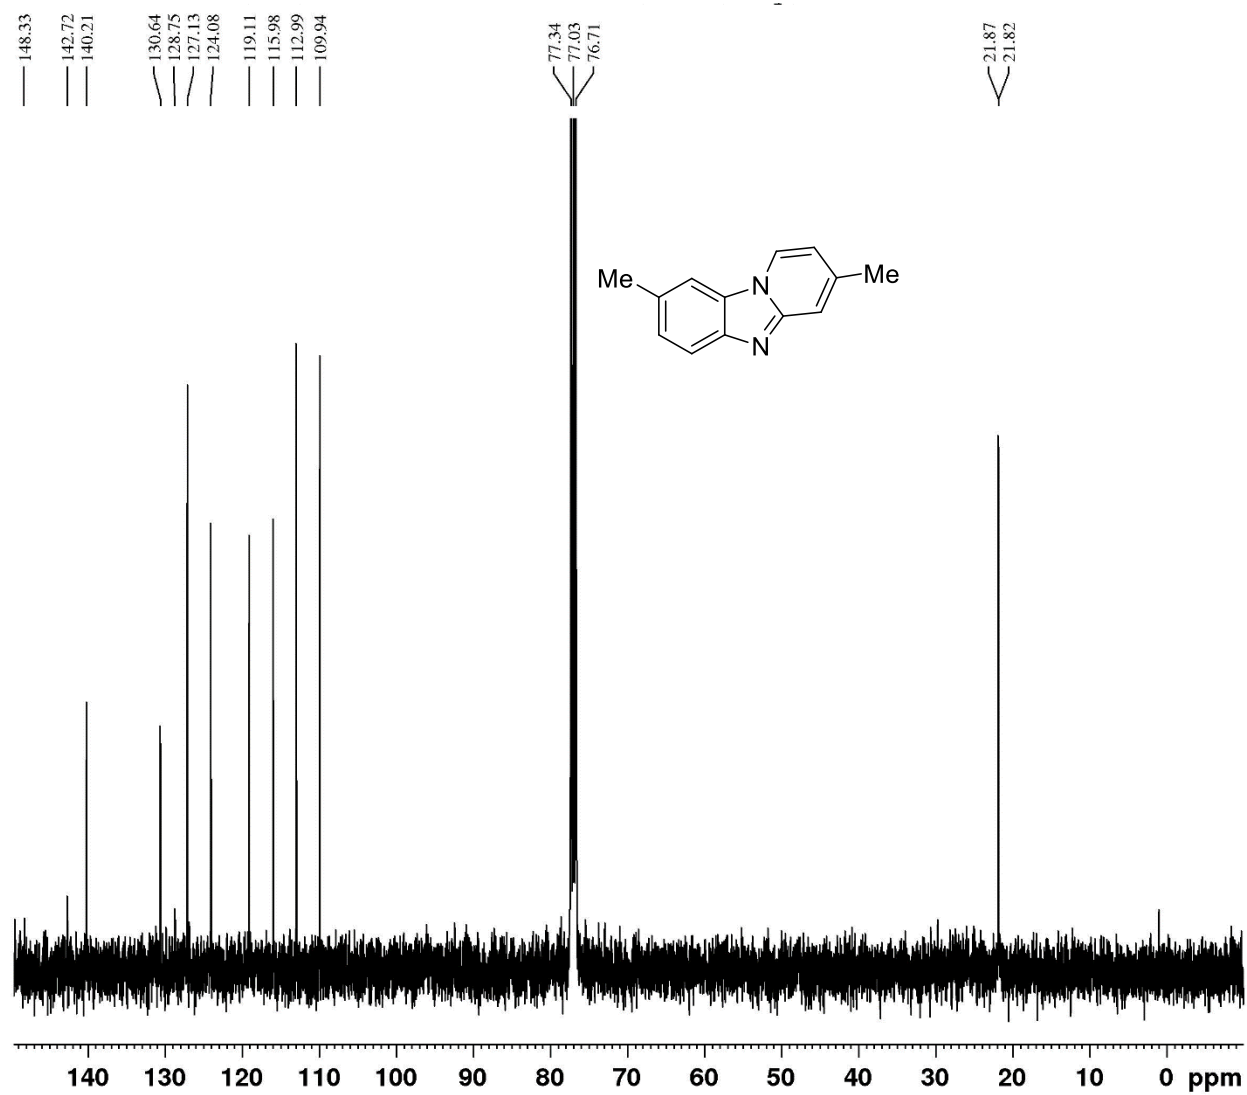

# <sup>1</sup>H NMR spectra of compound 3t

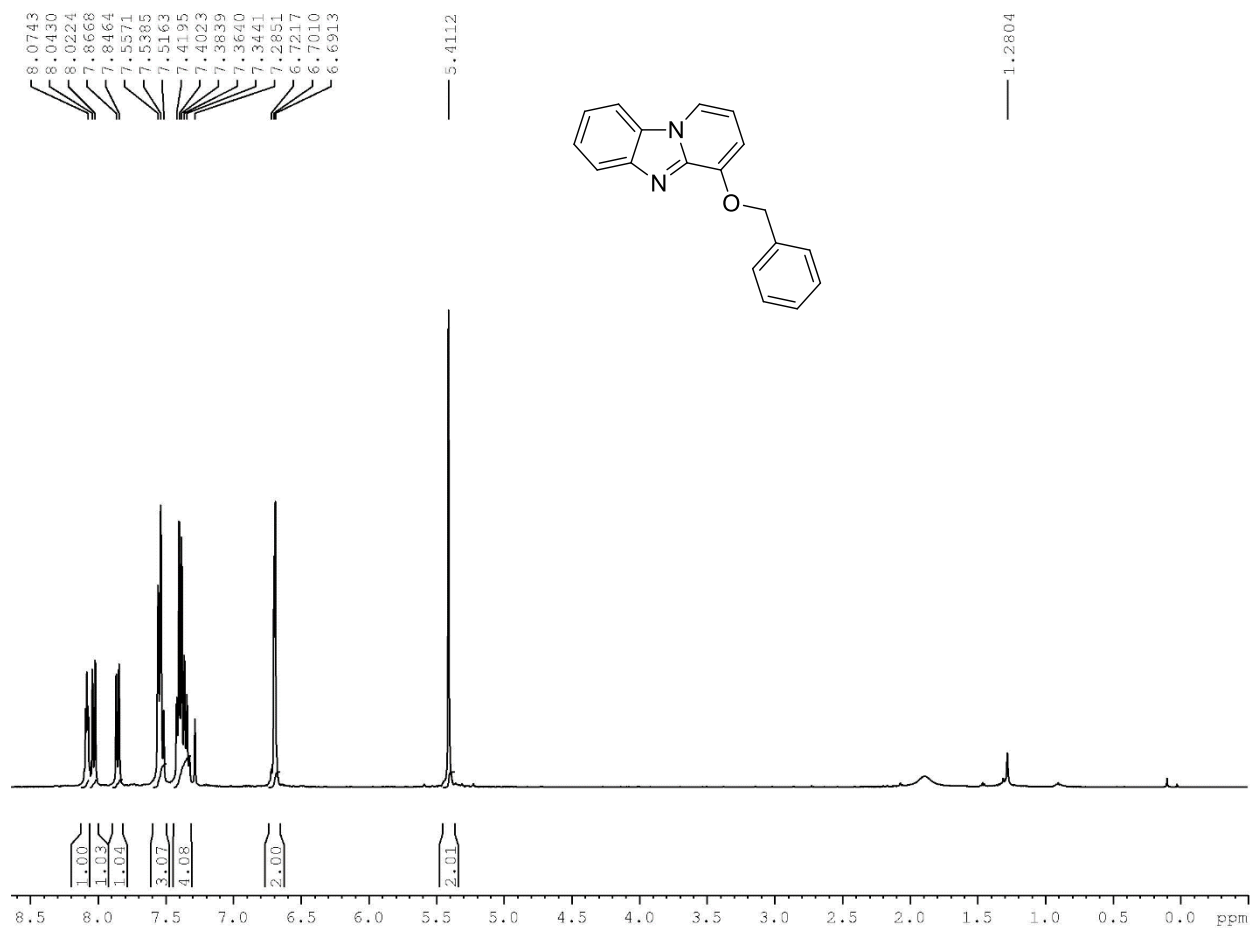

# <sup>13</sup>C NMR spectra of compound 3t

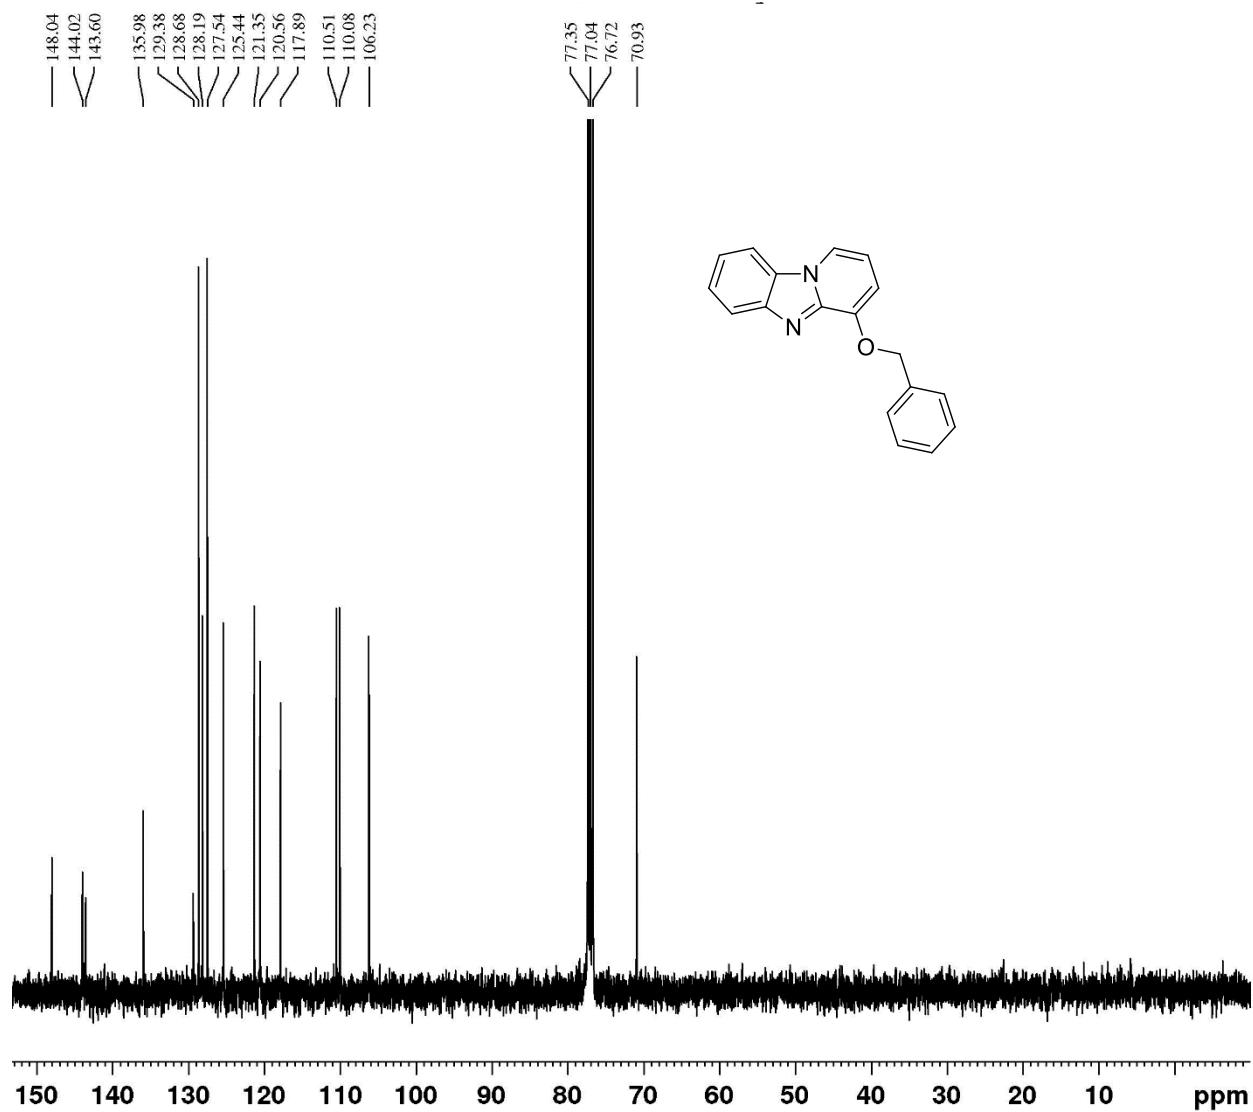

# <sup>1</sup>H NMR spectra of compound 3u

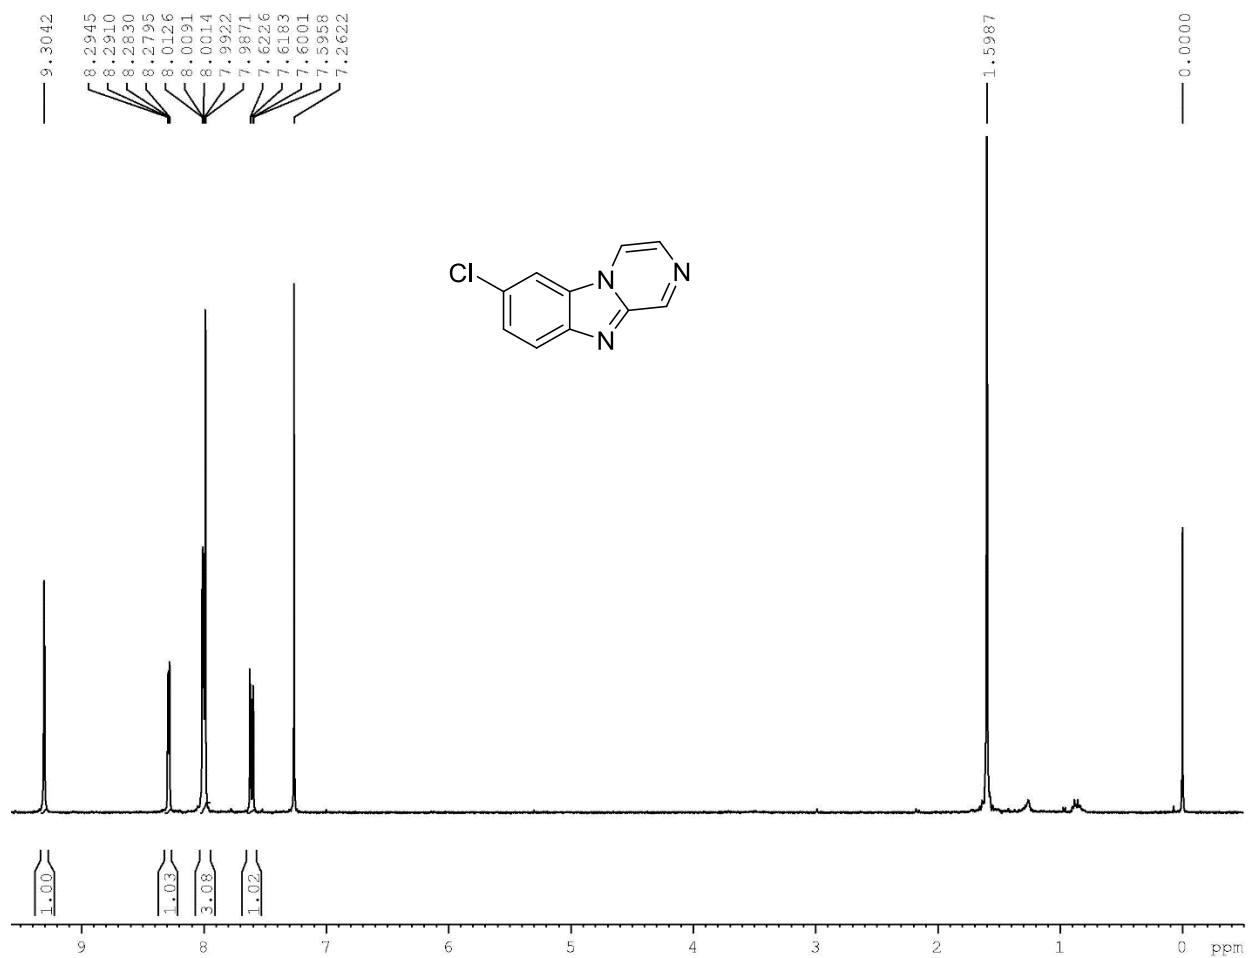

# <sup>13</sup>C NMR spectra of compound 3u

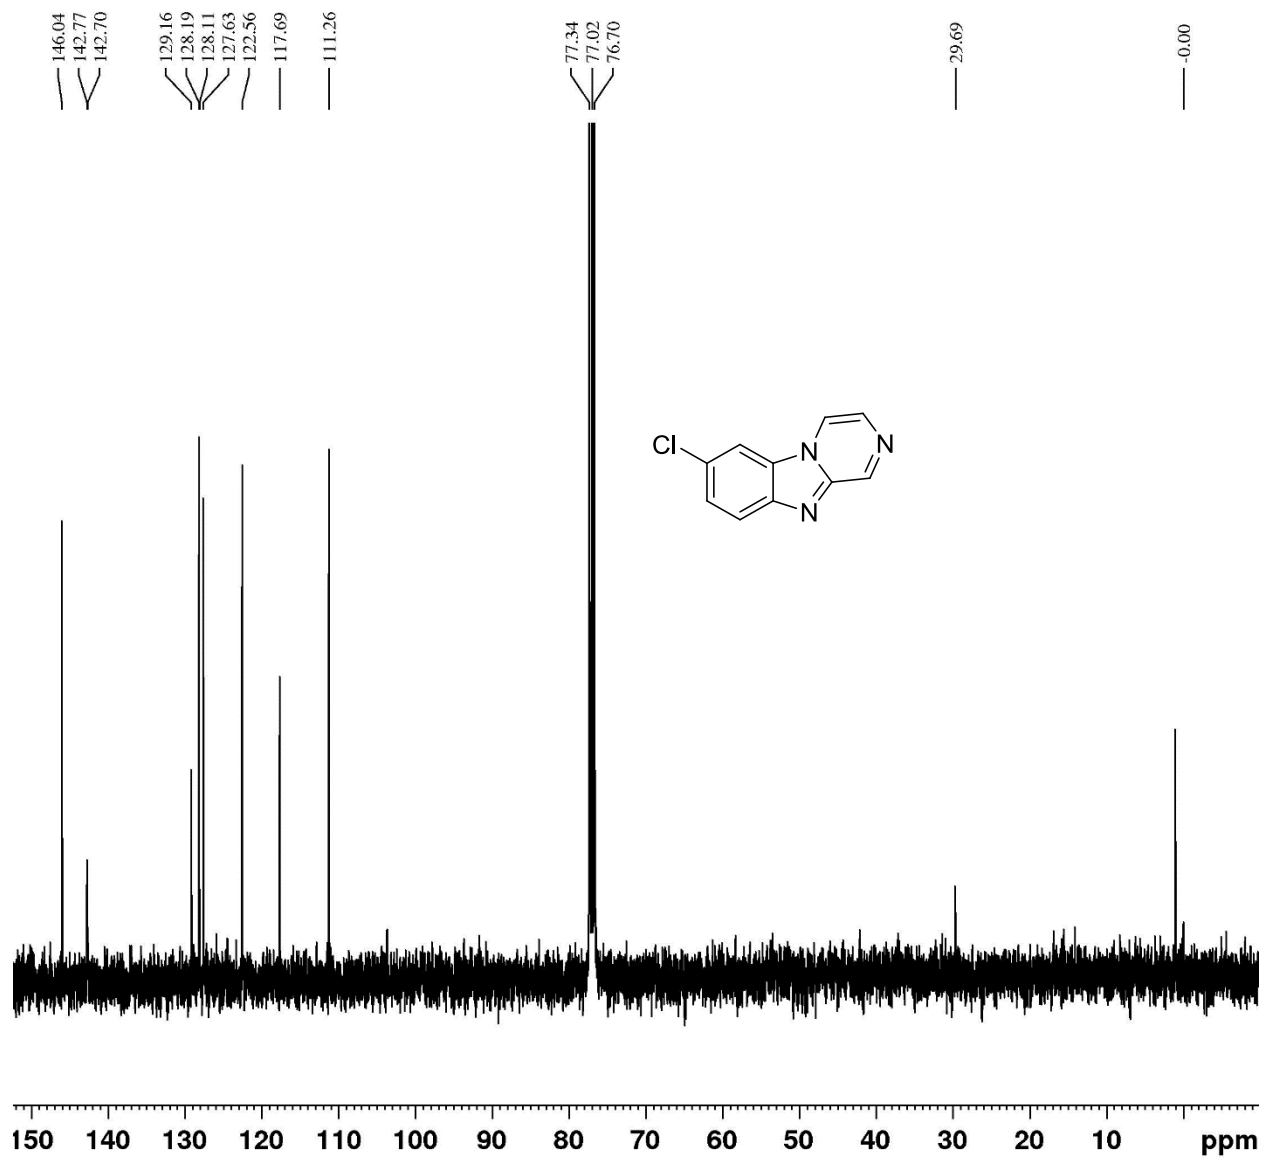

# <sup>1</sup>H NMR spectra of compound 3v

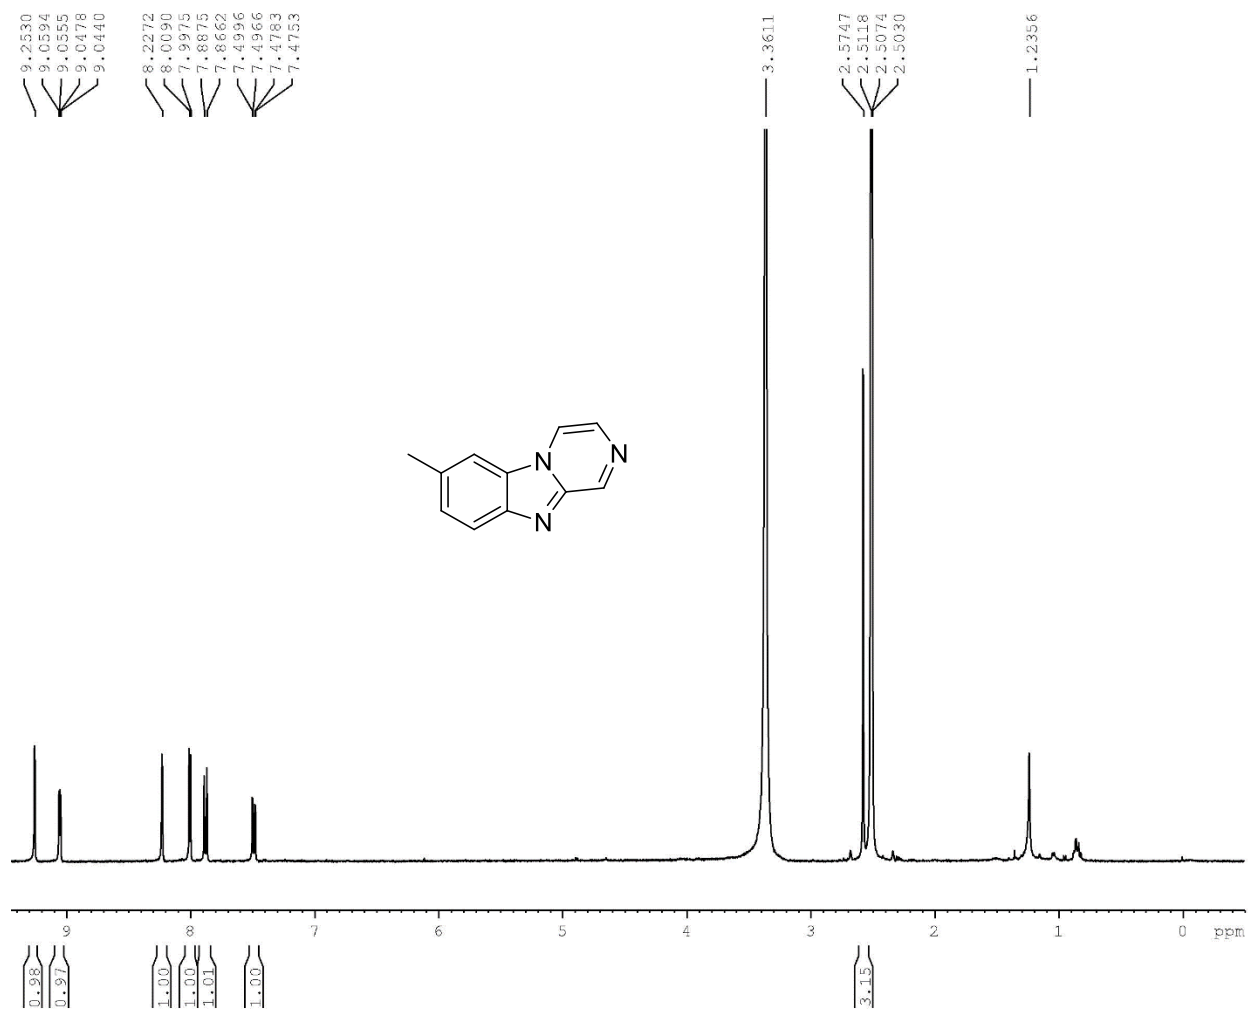



### <sup>13</sup>C NMR spectra of compound 3v

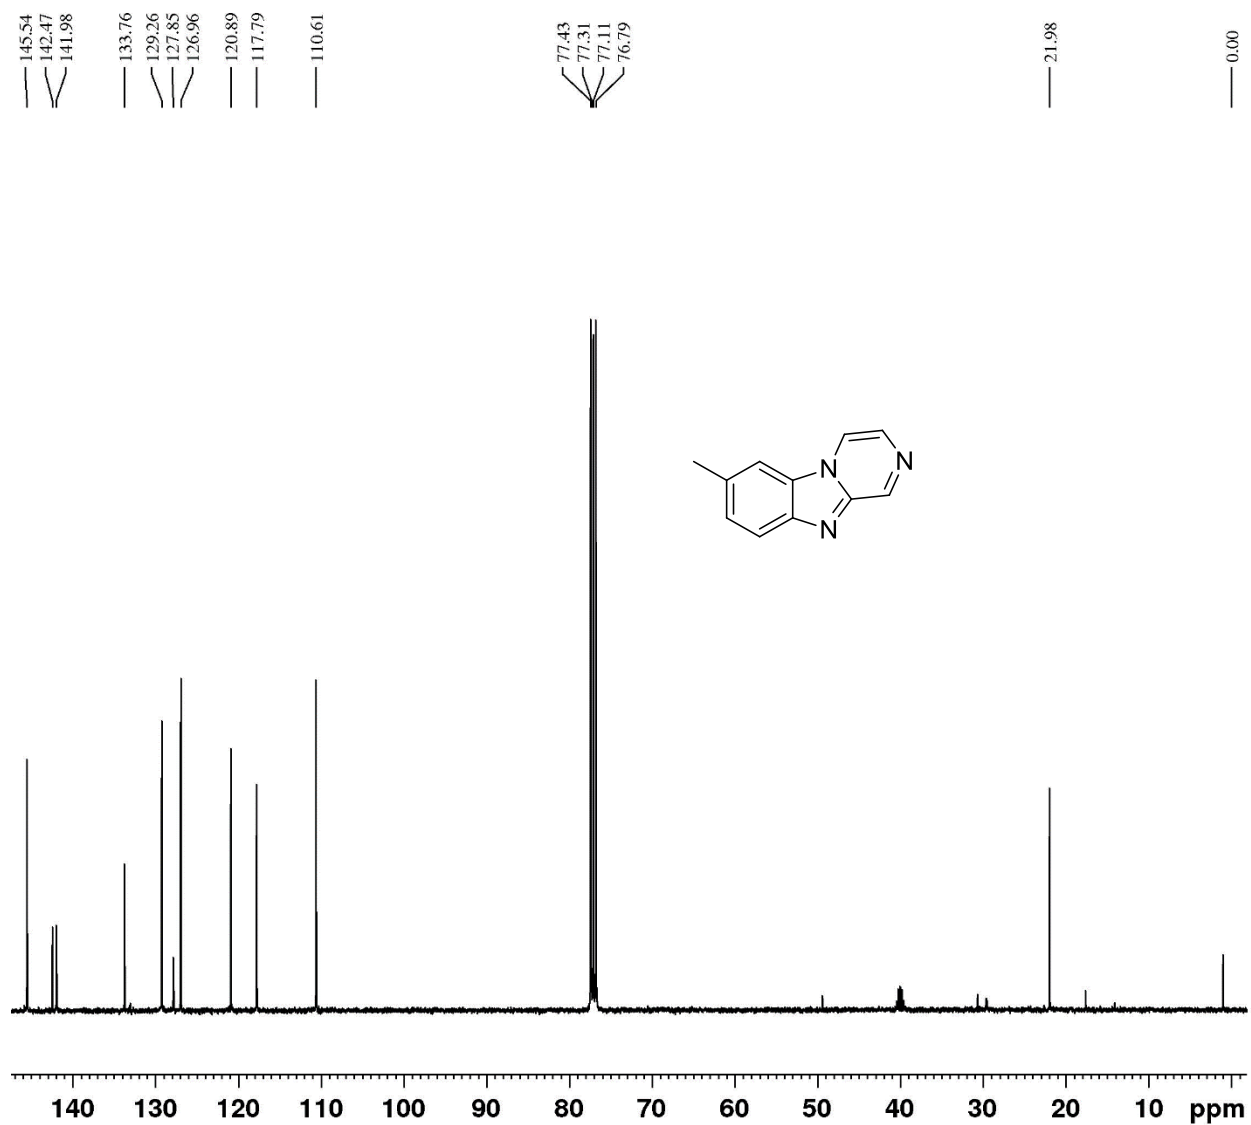

Spectral data of intermediates and side product and intermediates

# <sup>1</sup>H NMR spectra of compound 4s

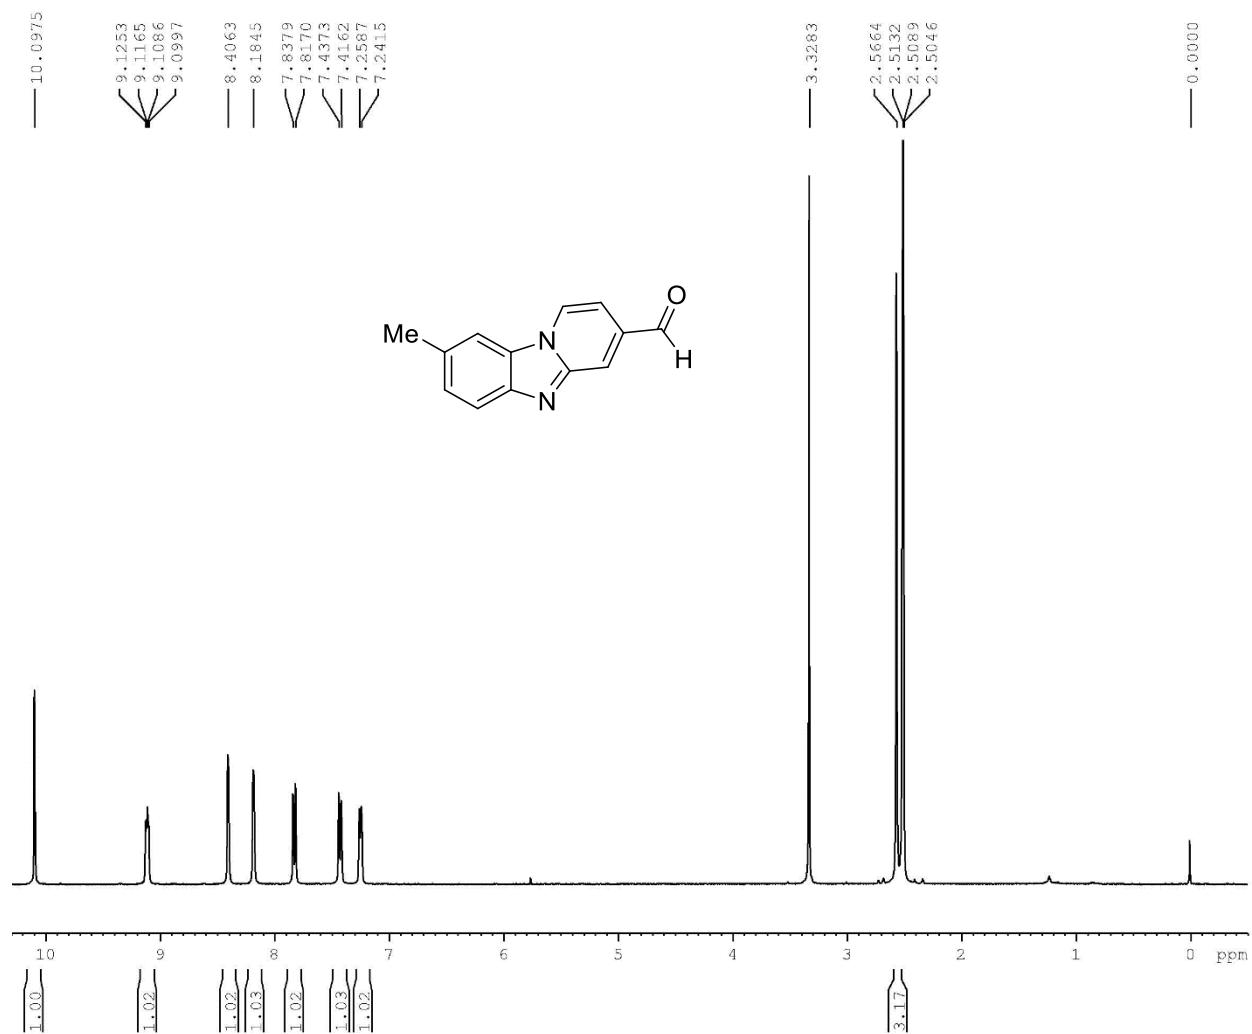

# <sup>13</sup>C NMR spectra of compound 4s

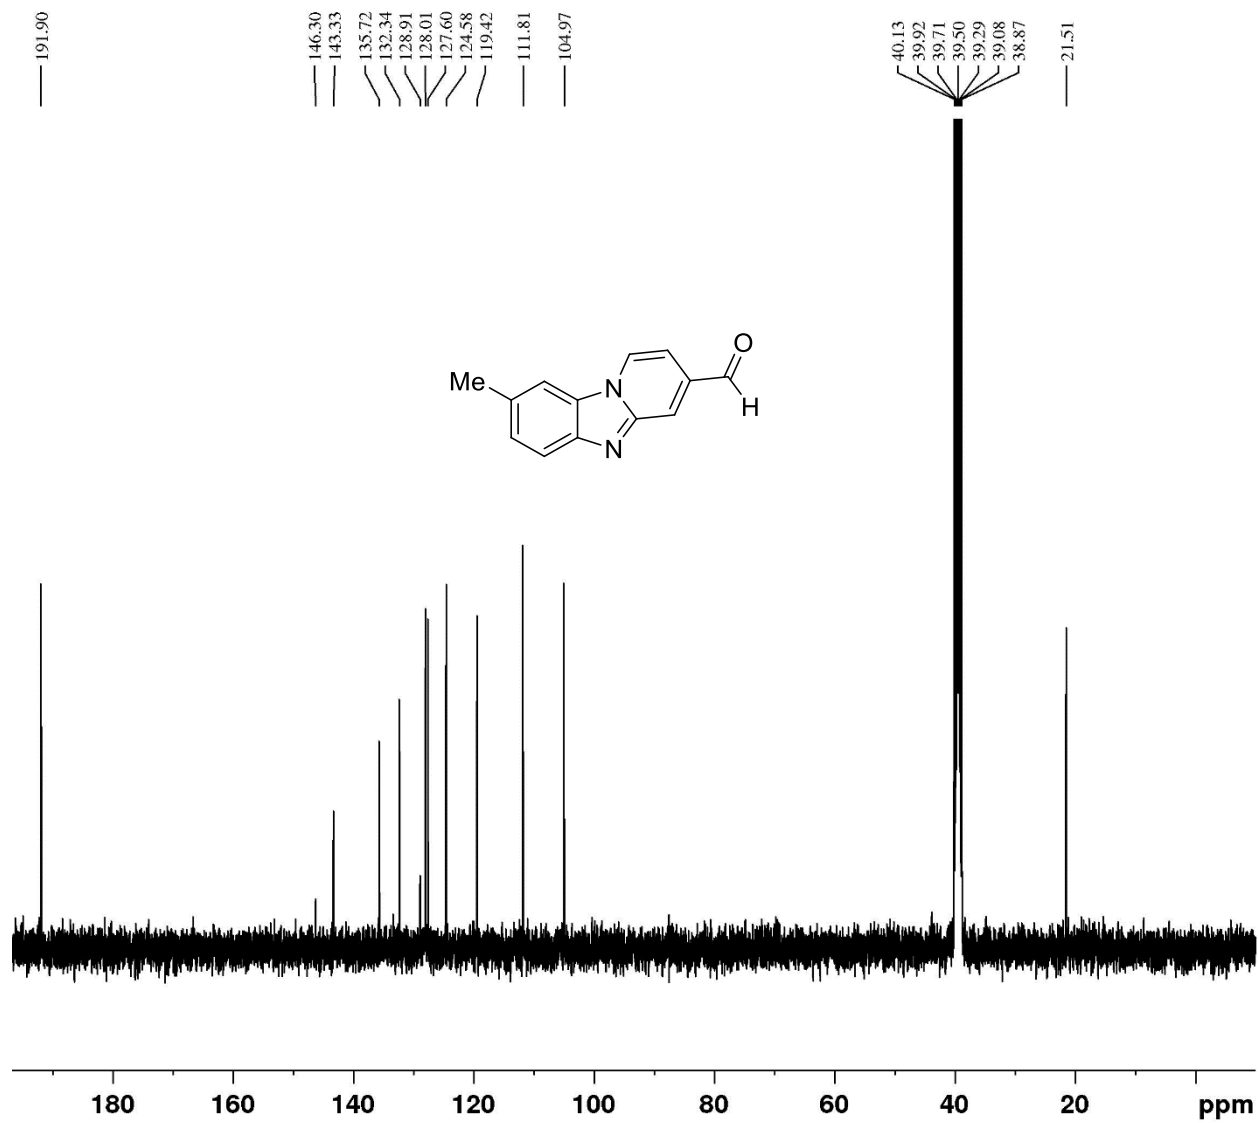

# <sup>1</sup>H NMR spectra of compound 3ai

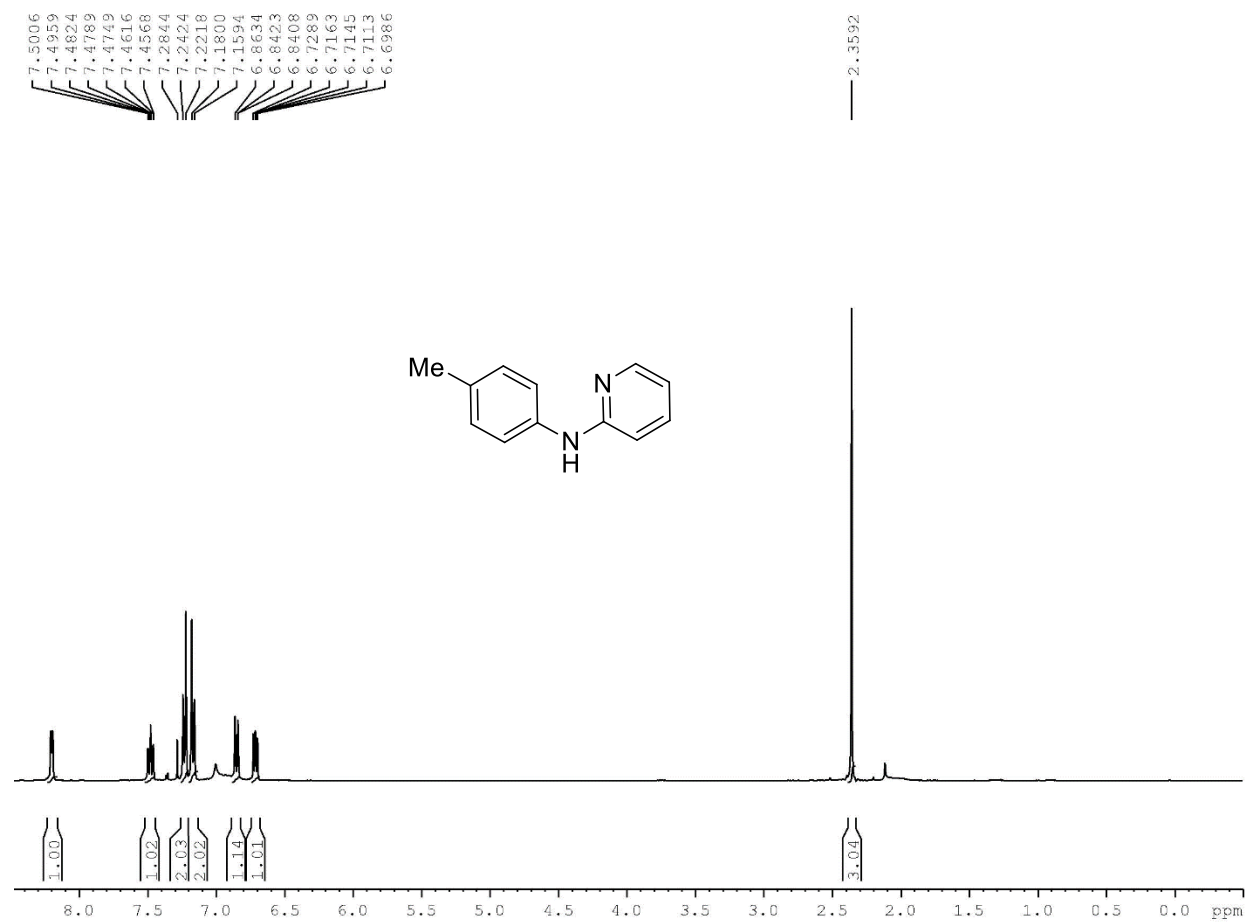

# <sup>13</sup>C NMR spectra of compound 3ai

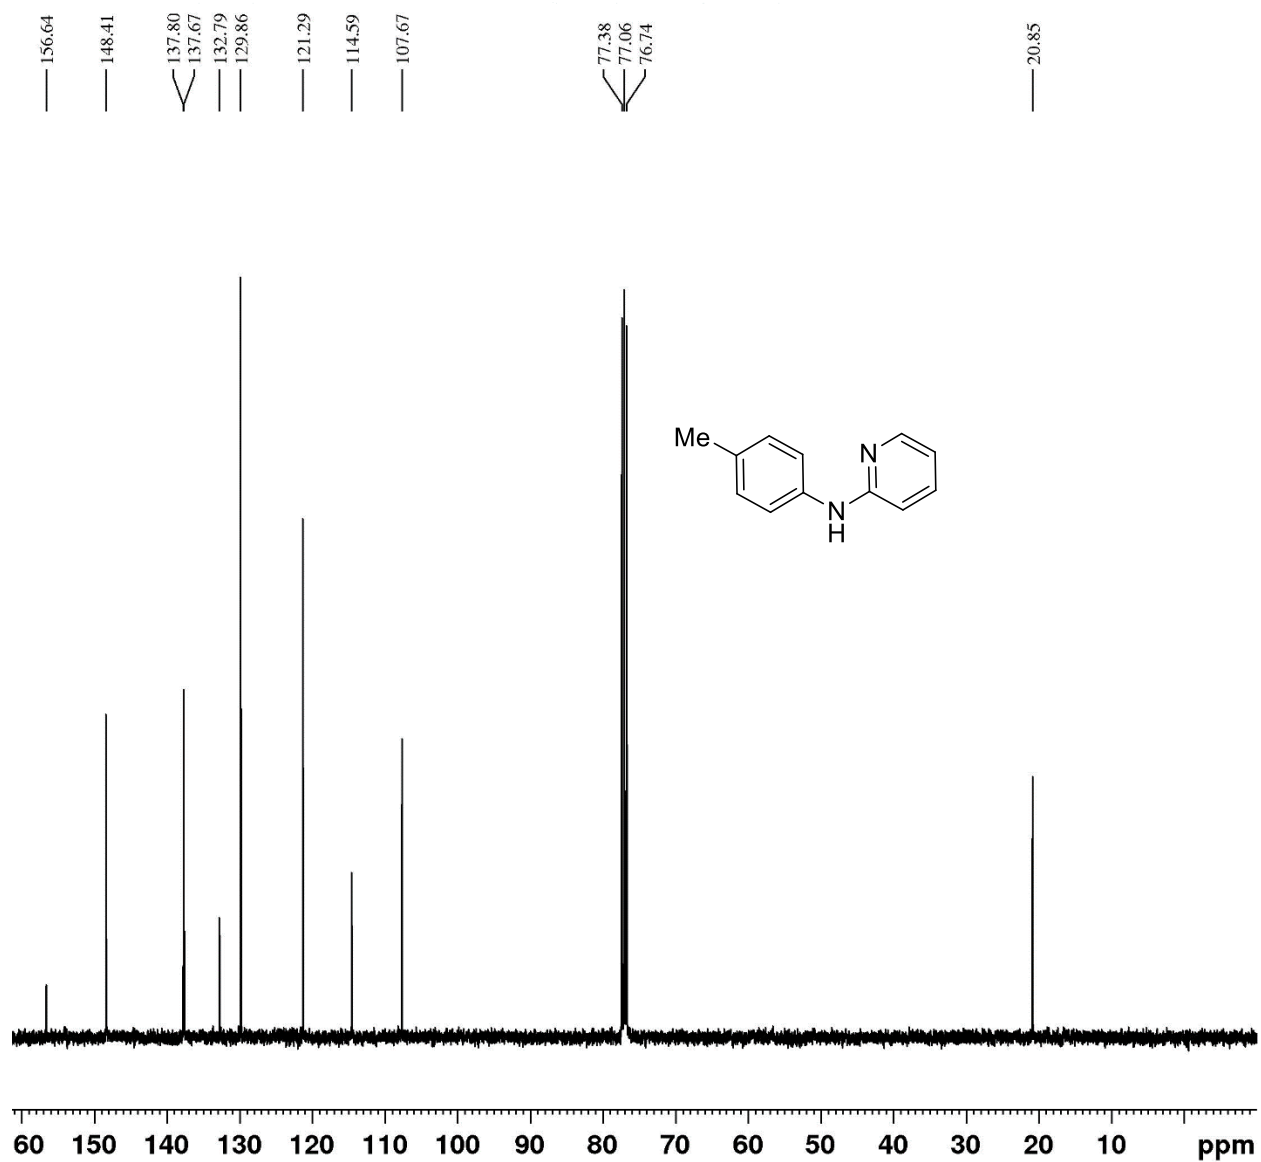

# <sup>1</sup>H NMR spectra of compound 3ci

8.2402  
7.5533  
7.5497  
7.5320  
7.5146  
7.5108  
7.4520  
7.4301  
7.2986  
7.2849  
7.2167  
6.8464  
6.8255  
6.8042  
6.7908  
6.7741  
6.6966

1.7382

0.0000

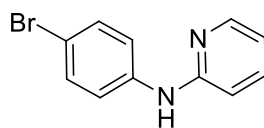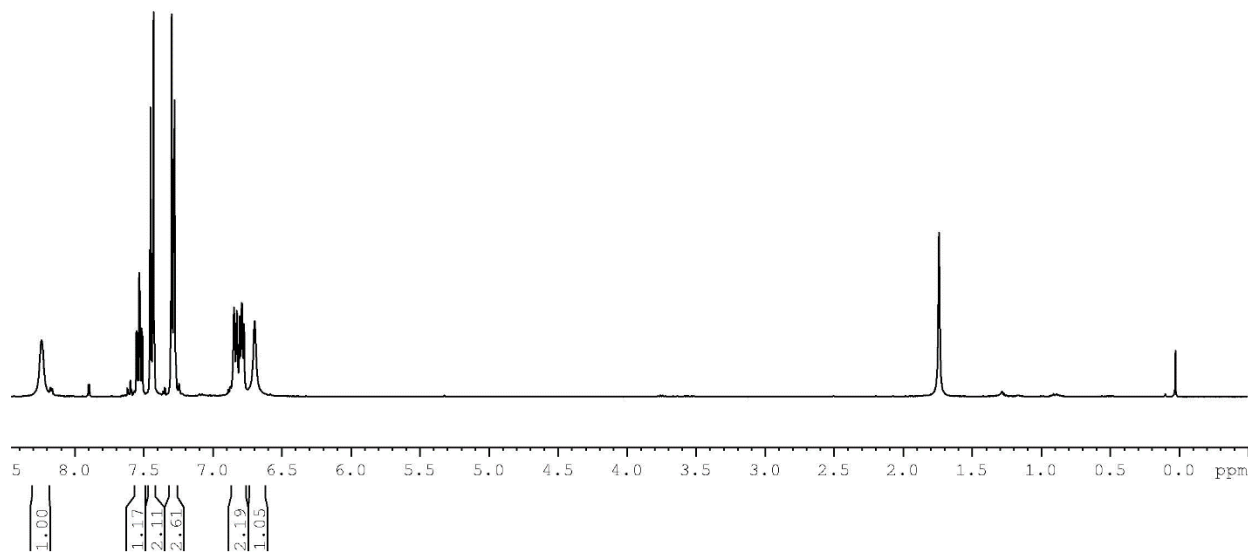

### <sup>13</sup>C NMR spectra of compound 3ci

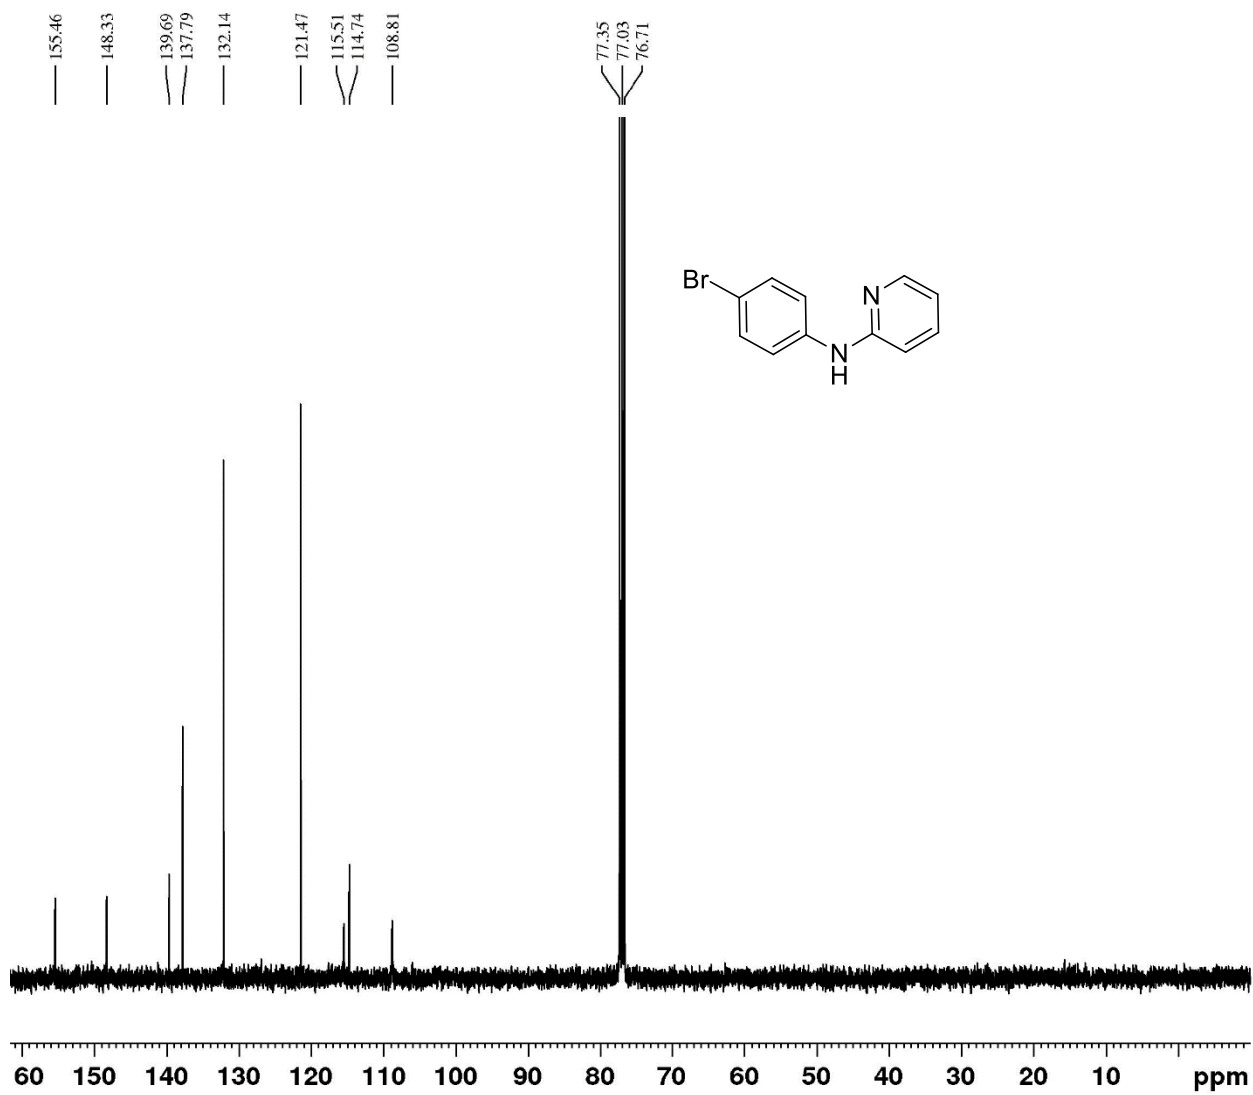

Supplement: c9nj04966e1.pdf [file c9nj04966e1.pdf]
